# Supplementary material for: Quinone derivatives isolated from the endolichenic fungus Phialocephala fortinii are Mdr1 modulators that combat azole resistance in Candida albicans
Source: PubMed Central journal article supplement (PMC5030645; doi:10.1038/srep33687), 2016-09-21
Supplement: srep33687-s1.pdf [file srep33687-s1.pdf]

## Supplementary Results

**Quinone derivatives isolated from the endolichenic fungus *Phialocephala fortinii* are Mdr1 modulators that combat azole resistance in *Candida albicans***

Fei Xie,<sup>‡</sup> Wenqiang Chang,<sup>‡</sup> Ming Zhang,<sup>‡</sup> Ying Li, Wei Li, Hongzhuo Shi, Sha Zheng, and Hongxiang Lou\*

Department of Natural Product Chemistry, Key Lab of Chemical Biology of the Ministry of Education, Shandong University, No. 44 West Wenhua Road, Jinan City, Shandong Province, China

<sup>‡</sup> These authors contributed equally to this work.

\*Corresponding author: Hongxiang Lou.

Mailing address: School of Pharmaceutical Sciences, Shandong University, 44 West Wenhua Road, Jinan 250012, China.

Phone: 86-531-88382012. Fax: 86-531-88382019.

E-mail: louhongxiang@sdu.edu.cn

## Contents

|                                                                                                                                                                                                                  |                |
|------------------------------------------------------------------------------------------------------------------------------------------------------------------------------------------------------------------|----------------|
| <b>Structure elucidation of natural products</b>                                                                                                                                                                 | <b>S3-S13</b>  |
| <b>Table S1.</b> $^1\text{H}$ and $^{13}\text{C}$ NMR Data for Compounds <b>1-4</b>                                                                                                                              | <b>S14</b>     |
| <b>Table S2.</b> $^1\text{H}$ and $^{13}\text{C}$ NMR Data for Compounds <b>7-10</b>                                                                                                                             | <b>S15</b>     |
| <b>Table S3.</b> $^1\text{H}$ and $^{13}\text{C}$ NMR Data for Compounds <b>11-13</b>                                                                                                                            | <b>S16</b>     |
| <b>Table S4.</b> <i>In vitro</i> susceptibilities of compounds in <i>Phialocephala fortinii</i> and FLC acting alone and in combination against <i>C. albicans</i> by checkerboard microdilution assay.          | <b>S17</b>     |
| <b>Table S5.</b> <i>C. albicans</i> strains used in this study.                                                                                                                                                  | <b>S18</b>     |
| <b>Table S6.</b> The primers used in this study.                                                                                                                                                                 | <b>S19</b>     |
| <b>Figure S1</b> The potent activity of the hit enhancing the efficacy of FLC against the azole-resistant <i>C. albicans</i> isolate 24D.                                                                        | <b>S20</b>     |
| <b>Figure S2–S87</b> X-ray crystallographic structure of compounds <b>2-4</b> and <b>7</b> , Key $^1\text{H}$ – $^1\text{H}$ COSY and HMBC correlations for new compounds, NMR, and CD spectra of new compounds. | <b>S21–S63</b> |

### Structure elucidation of natural products

Palmarumycin P1 (**1**) was obtained as a pink powder. An HRESIMS analysis gave a molecular ion at  $m/z$  359.0892 ( $[M + Na]^+$ ; calcd 359.0890), which was consistent with the molecular formula  $C_{20}H_{16}O_5$ . The  $^1H$  and  $^{13}C$  NMR spectra (**Table S1**) showed signals for a 1, 2, 3-trisubstituted aromatic ring ( $\delta_H$  7.13,  $\delta_C$  117.2, CH-5;  $\delta_H$  7.25,  $\delta_C$  128.9, CH-6;  $\delta_H$  6.96,  $\delta_C$  116.2, CH-7), two oxymethine ( $\delta_H$  4.89,  $\delta_C$  62.9, CH-1;  $\delta_H$  3.82,  $\delta_C$  65.9, CH-2), one methylene ( $\delta_H$  2.23 and 2.07,  $\delta_C$  36.2, CH<sub>2</sub>-3) and a set of signals characteristic of the dioxynaphthalene moiety. The correlations among these units were determined by the analysis of  $^1H$ - $^1H$  COSY and HMBC spectra (**Figure S2**). The  $^1H$ - $^1H$  COSY spectrum helped to identify the coupling systems H-1–H-2–H-3 and H-5–H-6–H-7 of structure **1**. The absolute configuration of **1** was determined as 1*R*, 2*S* by the contrary ECD Cotton effects [ $(\Delta\epsilon)$  230 (–2.00)] (**Figure S8**) with those of compound **5** and **6**<sup>1</sup>.

Palmarumycin P2 (**2**) was obtained as a pink crystals (MeOH). The molecular formula of compound **2** was determined to be  $C_{21}H_{18}O_5$  by HRESIMS analysis ( $m/z$  373.1048 ( $[M + Na]^+$ ; calcd 373.1046)). The additional CH<sub>2</sub> in the molecular formula relative to that of **1** and analysis of the  $^1H$  and  $^{13}C$  NMR spectra (**Table S1**) indicated that the hydroxyl group of C-1 in **1** was changed to a methoxy group in **2**. This has also been supported by the HMBC correlation from OCH<sub>3</sub>-1 ( $\delta_H$  3.52) to C-1 (73.0). The structure of compound **2** could be confirmed by other HMBC correlations (**Figure S9**). Comparison of the CD spectra (**Figure S16**) of compounds **5** and **6**<sup>1</sup>, together with the single-crystal X-ray diffraction analysis with Cu K $\alpha$  radiation (**Figure S10**), the absolute configuration of **2** was established as 1*R*, 2*S*.

Palmarumycin P3 (**3**), a pink crystals (MeOH), was assigned to have the same molecular formula  $C_{20}H_{16}O_5$  as Palmarumycin P1 (**1**) on the basis of HRESIMS analysis ( $m/z$  359.0890 ( $[M$

+ Na]<sup>+</sup>; calcd 359.0890)) and NMR data (**Table S1**). The 2D NMR data demonstrated that the compounds **1** and **3** have the same gross structure (**Figure S17**). While the C-1 and C-2 were shifted from  $\delta_C$  62.9 and 65.9 in **1** to  $\delta_C$  71.5 and 68.5 in **3**. Through optical rotation and CD spectra (**Figure S24**) and a single -crystal X-ray diffraction measurement (**Figure S18**), the absolute configuration of **3** could be determined as 1*S*, 2*S*.

Palmarumycin P4 (**4**) was obtained as a pink crystals (MeOH). HRESIMS ( $m/z$  333.0761 ([M – H]<sup>–</sup>; calcd 333.0759)) determined its molecular formula as C<sub>20</sub>H<sub>14</sub>O<sub>5</sub>.

The NMR data (**Table S1**) showed the compound **4** was also a spirobisnaphthalenes, and its structure was confirmed by single-crystal X-ray diffraction study (**Figure S25**).

Phialocephalarin A (**7**), a yellow crystals (MeOH), has the molecular formula C<sub>20</sub>H<sub>16</sub>O<sub>7</sub> as determined by HRESIMS ( $m/z$  367.0814 ([M – H]<sup>–</sup>; calcd 367.0813)) and <sup>13</sup>C NMR data, revealing 13 degrees of unsaturation. Analysis of <sup>1</sup>H, <sup>13</sup>C and HSQC NMR spectra (**Table S2**) showed the presence of five exchangeable protons, two methylene, four methines (three oxygenated), one quaternary carbons, 12 aromatic/olefinic carbons (including three oxygenated carbons and three aromatic methine carbons), and one carbonyl carbon. These data accounted for all <sup>1</sup>H and <sup>13</sup>C NMR resonances and indicated a perylene quinone skeleton with six rings. The <sup>1</sup>H–<sup>1</sup>H COSY spectrum revealed the coupling systems H-1–H-2–H-3 and H-2'–H-3'–H-4'. Through the HMBC spectrum (**Figure S31**), the planar structure of compound **7** was unambiguously established as depicted. The relative configuration of **7** was assigned by analysis of coupling constants of the protons and its NOESY data. In the NOESY spectrum, H-1 was correlated to H-3, which indicated these protons were in the same orientation. While the NMR data could not provide sufficient information to confirm the complete structure, a single-crystal

X-ray diffraction experiment was performed using Cu  $K\alpha$  radiation to clarify the uncertain structure details (**Figure S32**). Thus the absolute configuration of compound **7** was determined as 1*S*, 2*S*, 3*S*, 4*S*, 4'*S*.

Phialocephalarin B (**8**), a brown amorphous powder, HRESIMS ( $m/z$  383.0761 ( $[M - H]^-$ ; calcd 383.0762)) and  $^{13}\text{C}$  NMR data indicated the molecular formula  $\text{C}_{20}\text{H}_{16}\text{O}_8$ . Analysis of its  $^1\text{H}$ ,  $^{13}\text{C}$  and HSQC NMR spectra (**Table S2**) revealed similar structural features to those of **8**, except for the C-4' was shifted from  $\delta_{\text{C}}$  40.3 to  $\delta_{\text{C}}$  70.5. The analysis above indicated that one hydroxyl group attached to C-4', which was supported by detailed analysis of the HMBC spectrum of **8** (**Figure S40**).

Phialocephalarin C (**9**) was obtained as a brown amorphous powder with a molecular formula  $\text{C}_{20}\text{H}_{18}\text{O}_9$  as determined by the same strategy as compound **7** and **8**. The  $^1\text{H}$ ,  $^{13}\text{C}$  and HSQC NMR data (**Table S2**) were close to those of **8** except for the significantly downfield shifts of C-2 ( $\delta_{\text{C}}$  65.0 ppm in **9**;  $\delta_{\text{C}}$  50.6 ppm in **8**) and C-3 ( $\delta_{\text{C}}$  71.3 ppm in **9**;  $\delta_{\text{C}}$  53.4 ppm in **8**) were also different. These evidences indicated that two hydroxyl groups respectively were connected to C-2 and C-3 in **9** (**Figure S48**).

Phialocephalarin D (**10**) was isolated as a brown amorphous powder. HRESIMS and  $^{13}\text{C}$  NMR spectra determined its molecular formula as  $\text{C}_{20}\text{H}_{16}\text{O}_6$ . Analysis of the  $^1\text{H}$ ,  $^{13}\text{C}$  and HSQC data of **10** (**Table S2**) indicated that the presence of two carbonyl carbon and four methylene, one methines, one quaternary carbons, 12 aromatic/olefinic carbons (including three oxygenated carbons and three aromatic methine carbons), which showed that compound **10** was also a novel perylene quinone derivative as **7** (**Figure S56**).

In order to determine the Phialocephalarin B-D (**8-10**) configurations, the NOESY, optical

rotation and CD spectra were detected. From a biosynthetic standpoint, together with comparison of the CD spectra of compounds **7-10** (**Figure S39, S47, S55, S63**), the absolute configuration assignments of **8-10** could be determined (**Figure 1**).

Juglanone C (**11**) was obtained as a brown amorphous powder. Its molecular formula was determined as  $C_{20}H_{18}O_5$  by HRESIMS with  $m/z$  361.1055  $[M + Na]^+$  (calcd 361.1046). The  $^1H$  and  $^{13}C$  NMR together with HSQC data of **2** (**Table S3**) indicated one chelated phenolic H-atom ( $\delta_H$  12.43), two CH-O ( $\delta_H$  4.68,  $\delta_C$  66.5, C-4 and  $\delta_H$  5.74,  $\delta_C$  73.4, C-4') and four  $CH_2$  groups ( $\delta_H$  2.45 and 2.57,  $\delta_C$  36.6, C-2;  $\delta_H$  1.86 and 2.12,  $\delta_C$  31.2, C-3;  $\delta_H$  2.75 and 3.12,  $\delta_C$  33.9, C-2';  $\delta_H$  2.27 and 2.36,  $\delta_C$  27.5, C-3') and six aromatic methines ( $\delta_H$  7.23,  $\delta_C$  119.8, CH-6;  $\delta_H$  7.56,  $\delta_C$  133.9, CH-7;  $\delta_H$  7.33,  $\delta_C$  115.6, CH-8;  $\delta_H$  7.09,  $\delta_C$  119.0, CH-5';  $\delta_H$  7.53,  $\delta_C$  136.6, CH-6';  $\delta_H$  6.95,  $\delta_C$  117.5, CH-7'). The NMR data demonstrated that compound **11** have the same gross structure with Juglanone A<sup>2</sup>, which was confirmed by HMBC spectrum (**Figure S64**). In the NOESY spectrum of **11**, there is no correlation between H-4 and H4'. The CD spectra of **11** and Juglanone A were similar expect that compound **11** showed a negative Cotton effect at 226 nm (**Figure S71**). From a standpoint of biosynthesis, together with comparison of the CD spectra of compound **11** and Juglanone A, the absolute configuration of **11** was established as 4*S*, 4'*S*. Finally, the structure of compound **11** was unambiguously determined as depicted in **Figure 1**.

Juglanone D (**12**) was obtained as a brown amorphous powder. Its molecular formula was established as  $C_{20}H_{20}O_5$  from HRESIMS ( $m/z$  363.1201 ( $[M + Na]^+$ ; calcd 363.1203)). The  $^1H$  and  $^{13}C$  NMR spectra of **12** (**Table S3**) indicated that it was also an tetralone dimer like compound **11** except that the C-1 was changed from an C=O to C-OH at  $\delta_C$  60.0. In the NOESY spectrum of **12**, there is a correlation between H-1 and H-4. The CD behavior and optical rotation of **12** (**Figure**

**S79**) were similar to those of **11**, which proved the absolute configuration at C-4 and C-4' were also assigned *S*. Further, the absolute configuration at C-1 was determined *R*. Thus, the structure of compound **12** was determined as shown in **Figure 1**.

Juglanone E (**13**) was isolated as a brown amorphous powder. The compound **13** was analyzed for C<sub>20</sub>H<sub>20</sub>O<sub>5</sub> by the same strategy as that of **12**. The IR and UV spectra showed the same absorptions which indicated the same skeleton as that of **12**. Careful comparison of their <sup>1</sup>H NMR data (**Table S3**) suggested that the H-atom signals due to an aromatic ring were changed. Further analysis of its <sup>13</sup>C NMR, HMQC and HMBC spectra showed that one subunit of **13** is 8-hydroxy-naphthalenol, as shown in **Figure S79**. NOESY correlations of H-1 with H-4' proved that they were in the same orientation. The absolute configuration of **13** was established as 1*S*, 4*S*, 4'*S* based on comparing the CD spectra (**Figure S87**) and optical rotation of compounds **11**, **12** and **13**.

The known compounds were identified as CJ-12,371(**5**), Palmarumycins CP<sub>19</sub> (**6**), (-)-Regiolone (**14**), Sclerone (**15**), by comparison of their spectroscopic data with previously reported data.<sup>1,3,4</sup>

Fraction D (1.2 g) was subjected to a Sephadex LH-20 CC and eluted with CH<sub>2</sub>Cl<sub>2</sub>/MeOH (1:1) to obtain five subfractions (D<sub>1</sub>-D<sub>5</sub>). Fraction D<sub>5</sub> (146.1mg) was fractionated using MPLC (ODS, MeOH/H<sub>2</sub>O from 50:50 to 100:0) to yield six subfractions (D<sub>5A</sub>-D<sub>5F</sub>). Then, **14** (*t*<sub>R</sub> 17.2 min; 49.6 mg) was isolated from D<sub>5A</sub> (87.4 mg) by HPLC (51% MeOH/H<sub>2</sub>O, 1.5 mL/min). D<sub>5B</sub> (16.7 mg) was purified by HPLC (81% MeOH/H<sub>2</sub>O, 1.5 mL/min) to yield **6** (*t*<sub>R</sub> 23.0 min; 4.1 mg).

Fraction E (1.2 g) was separated using Sephadex LH-20 CC by elution with CH<sub>2</sub>Cl<sub>2</sub>/MeOH (1:1) to afford four subfractions (E<sub>1</sub>-E<sub>4</sub>). Fraction E<sub>4</sub> (212.4 mg) was separated to subfractions E<sub>4A</sub>-E<sub>4G</sub> by MPLC (ODS, MeOH/H<sub>2</sub>O from 30:70 to 100:0). Fraction E<sub>4A</sub> (24.1 mg) was further purified

using HPLC (30% MeOH /H<sub>2</sub>O, 1.5 mL/min) to yield **15** (1.8 mg,  $t_R = 27.2$  min). Separation of fraction E<sub>4E</sub> following a similar procedure to that used for fraction D<sub>5A</sub> afforded **2** (HPLC, 67% MeOH/H<sub>2</sub>O, 1.5 mL/min; 2.7 mg,  $t_R = 40.7$  min). Further purification of E<sub>4D</sub> (31.9 mg) with HPLC (60% MeOH/H<sub>2</sub>O, 1.5 mL/min) yielded **11** ( $t_R$  17.0 min; 1.4 mg) and **10** ( $t_R$  30.0 min; 3.9 mg). Fraction E<sub>4F</sub> was purified to give **4** ( $t_R$  23.0 min; 2.6 mg) and **5** ( $t_R$  19.0 min; 1.0 mg) by using HPLC (80% MeOH/H<sub>2</sub>O, 1.5 mL/min).

Fraction F (1.6 g) was fractionated using MPLC (ODS, MeOH/H<sub>2</sub>O from 40:60 to 100:0) to yield three subfractions (F<sub>1</sub>–F<sub>3</sub>). Fraction F<sub>1</sub> (21.9 mg) was subjected to HPLC using 50% aqueous MeOH (1.5 mL/min) to yield **13** (1.2 mg,  $t_R = 32.0$  min). Fraction F<sub>2</sub> (56.0 mg) was purified by HPLC using MeOH/H<sub>2</sub>O (70:30, 1.5 mL/min) to afford **12** (1.8 mg,  $t_R = 15.1$  min), **1** (1.4 mg,  $t_R = 23.3$  min) and **3** (38.0 mg,  $t_R = 30.0$  min).

Fraction G (2.2 g) was also separated using Sephadex LH-20 CC by elution with CH<sub>2</sub>Cl<sub>2</sub>/MeOH (1:1) to afford three subfractions (G<sub>1</sub>–G<sub>3</sub>). Fraction G<sub>3</sub> was further purified using HPLC(40% MeOH/H<sub>2</sub>O, 1.5 mL/min) afforded **7** (10.0mg,  $t_R = 35.5$  min). Fraction H (3.9 g) was purified to give **8** (39.1 mg;  $t_R = 15.0$  min) and **9** (1.9 mg;  $t_R = 18.7$  min) by using HPLC (25% MeOH/H<sub>2</sub>O, 1.5 mL/min).

*Palmarumycin P1 (1)*: pink powder;  $[\alpha]_D^{20} -26.0$  (c 0.1, MeOH); ECD (MeOH)  $\lambda_{\max}$  ( $\Delta\epsilon$ ) 230 (-2.00); UV (MeOH)  $\lambda_{\max}$  (log  $\epsilon$ ) 227 (3.97), 285 (3.15), 300 (3.08), 315 (3.00), 327 (2.96) nm; IR (KBr)  $\nu_{\max}$  3375, 2921, 2851, 1635, 1605, 1582, 1456, 1410, 1377, 1269, 1165, 1122, 1059, 955, 746 cm<sup>-1</sup>; for <sup>1</sup>H and <sup>13</sup>C NMR data, see Table S1; HRESIMS  $m/z$  359.0892 [M + Na]<sup>+</sup> (calcd for C<sub>20</sub>H<sub>16</sub>O<sub>5</sub>Na 359.0890).

*Palmarumycin P2 (2)*: pink crystals; mp > 250 °C;  $[\alpha]_D^{20} -89.1$  (c 0.1, MeOH); ECD (MeOH)



$\lambda_{\max}$  ( $\Delta\epsilon$ ) 227 (-9.16); UV (MeOH)  $\lambda_{\max}$  ( $\log \epsilon$ ) 227 (4.79), 287 (3.92), 300 (3.86), 315 (3.77), 327 (3.43) nm; IR (KBr)  $\nu_{\max}$  3226, 2938, 2837, 1633, 1604, 1471, 1410, 1377, 1323, 1272, 1124, 1054, 940, 753  $\text{cm}^{-1}$ ; for  $^1\text{H}$  and  $^{13}\text{C}$  NMR data, see Table S1; HRESIMS  $m/z$  373.1048  $[\text{M} + \text{Na}]^+$  (calcd for  $\text{C}_{21}\text{H}_{18}\text{O}_5\text{Na}$  373.1046).

*Palmarumycin P3 (3)*: pink crystals; mp > 250 °C;  $[\alpha]_D^{20}$  +1.2 (c 0.05, MeOH); ECD (MeOH)  $\lambda_{\max}$  ( $\Delta\epsilon$ ) 226 (+1.83); UV (MeOH)  $\lambda_{\max}$  ( $\log \epsilon$ ) 227 (4.41), 287 (3.61), 300 (3.60), 315 (3.51), 327 (3.30) nm; IR (KBr)  $\nu_{\max}$  3422, 3370, 3005, 2924, 2853, 1634, 1607, 1462, 1413, 1379, 1270, 1119, 1063, 943, 756  $\text{cm}^{-1}$ ; for  $^1\text{H}$  and  $^{13}\text{C}$  NMR data, see Table S1; HRESIMS  $m/z$  359.0890  $[\text{M} + \text{Na}]^+$  (calcd for  $\text{C}_{20}\text{H}_{16}\text{O}_5\text{Na}$  359.0890).

*Palmarumycin P4 (4)*: pink crystals; mp > 250 °C; UV (MeOH)  $\lambda_{\max}$  ( $\log \epsilon$ ) 227 (4.41), 287 (3.61), 300 (3.60), 315 (3.51), 327 (3.30) nm; IR (KBr)  $\nu_{\max}$  3422, 3370, 3005, 2924, 2853, 1634, 1607, 1462, 1413, 1379, 1270, 1119, 1063, 943, 756  $\text{cm}^{-1}$ ; for  $^1\text{H}$  and  $^{13}\text{C}$  NMR data, see Table S1; HRESIMS  $m/z$  333.0761  $[\text{M} - \text{H}]^-$  (calcd for  $\text{C}_{20}\text{H}_{13}\text{O}_5$  333.0759).

*Phialocephalarin A (7)*: yellow crystals; mp > 250 °C;  $[\alpha]_D^{20}$  -291.2 (c 0.006, MeOH); ECD (MeOH)  $\lambda_{\max}$  ( $\Delta\epsilon$ ) 209 (+18.85), 236 (-10.00), 260 (-4.69), 309 (-3.51); UV (MeOH)  $\lambda_{\max}$  ( $\log \epsilon$ ) 210 (4.41), 260 (4.12), 278 (4.15), 382 (3.34) nm; IR (KBr)  $\nu_{\max}$  3354, 2957, 1639, 1596, 1458, 1361, 1281, 1167, 1023  $\text{cm}^{-1}$ ; for  $^1\text{H}$  and  $^{13}\text{C}$  NMR data, see Table S2; HRESIMS  $m/z$  367.0814  $[\text{M} - \text{H}]^-$  (calcd for  $\text{C}_{20}\text{H}_{15}\text{O}_8$  367.0813).

*Phialocephalarin B (8)*: brown amorphous powder;  $[\alpha]_D^{20}$  -365.4 (c 0.1, MeOH); ECD (MeOH)  $\lambda_{\max}$  ( $\Delta\epsilon$ ) 209 (+34.69), 236 (-18.28), 261 (-10.10), 308 (-8.52); UV (MeOH)  $\lambda_{\max}$  ( $\log \epsilon$ ) 210 (4.60), 261 (4.35), 280 (4.39), 382 (3.49) nm; IR (KBr)  $\nu_{\max}$  3540, 3211, 1638, 1493, 1393, 1336, 1291, 1248, 1181, 1038  $\text{cm}^{-1}$ ; for  $^1\text{H}$  and  $^{13}\text{C}$  NMR data, see Table S2; HRESIMS  $m/z$  383.0761

$[M - H]^-$  (calcd for  $C_{20}H_{15}O_8$  383.0762).

*Phialocephalarin C (9)*: brown amorphous powder;  $[\alpha]_D^{20}$   $-136.0$  (c 0.01, MeOH); ECD (MeOH)  $\lambda_{max}$  ( $\Delta\epsilon$ ) 207 (+10.23), 236 (-8.33), 259 (-2.77), 311 (-2.56); UV (MeOH)  $\lambda_{max}$  ( $\log \epsilon$ ) 210 (4.36), 261 (3.93), 280 (3.97), 382 (3.03) nm; IR (KBr)  $\nu_{max}$  3439, 2919, 1724, 1628, 1586, 1434, 1368, 1239, 1042  $cm^{-1}$ ; for  $^1H$  and  $^{13}C$  NMR data, see Table S2; HRESIMS  $m/z$  401.0871  $[M - H]^-$  (calcd for  $C_{20}H_{17}O_9$  401.0867).

*Phialocephalarin D (10)*: brown amorphous powder;  $[\alpha]_D^{20}$   $-282.8$  (c 0.025, MeOH); ECD (MeOH)  $\lambda_{max}$  ( $\Delta\epsilon$ ) 217 (+7.07), 259 (-5.29); UV (MeOH)  $\lambda_{max}$  ( $\log \epsilon$ ) 216 (4.12), 250 (4.02), 259 (4.00), 340 (3.29) nm; IR (KBr)  $\nu_{max}$  3392, 2922, 1627, 1544, 1451, 1336, 1244, 1169, 1024  $cm^{-1}$ ; for  $^1H$  and  $^{13}C$  NMR data, see Table S2; HRESIMS  $m/z$  351.0855  $[M - H]^-$  (calcd for  $C_{20}H_{15}O_6$  351.0864).

*Juglanone C (11)*: brown amorphous powder;  $[\alpha]_D^{20}$   $-62.8$  (c 0.05, MeOH); ECD (MeOH)  $\lambda_{max}$  ( $\Delta\epsilon$ ) 226 (-4.67), 245 (+3.65), 263 (-5.53), 310 (-1.64); UV (MeOH)  $\lambda_{max}$  ( $\log \epsilon$ ) 213 (3.46), 258 (3.03), 321 (2.62) nm; IR (KBr)  $\nu_{max}$  3396, 2924, 2854, 1635, 1588, 1454, 1243, 1162, 1098, 805, 747  $cm^{-1}$ ; for  $^1H$  and  $^{13}C$  NMR data, see Table S3; HRESIMS  $m/z$  361.1055  $[M + Na]^+$  (calcd for  $C_{20}H_{18}O_5Na$  361.1046).

*Juglanone D (12)*: brown amorphous powder;  $[\alpha]_D^{20}$   $-108.4$  (c 0.03, MeOH); ECD (MeOH)  $\lambda_{max}$  ( $\Delta\epsilon$ ) 226 (-2.18), 265 (-3.33); UV (MeOH)  $\lambda_{max}$  ( $\log \epsilon$ ) 212 (3.26), 257 (2.83), 330 (2.39) nm; IR (KBr)  $\nu_{max}$  3401, 2925, 2855, 1727, 1639, 1582, 1456, 1248, 1165, 1099, 806, 744  $cm^{-1}$ ; for  $^1H$  and  $^{13}C$  NMR data, see Table S3; HRESIMS  $m/z$  363.1201  $[M + Na]^+$  (calcd for  $C_{20}H_{20}O_5Na$  363.1203).

*Juglanone E (13)*: brown amorphous powder;  $[\alpha]_D^{20}$   $-53.6$  ( $c$  0.05, MeOH); ECD (MeOH)  $\lambda_{\max}$  ( $\Delta\epsilon$ ) 265 ( $-2.13$ ), 332 ( $-0.56$ ); UV (MeOH)  $\lambda_{\max}$  ( $\log \epsilon$ ) 213 (4.31), 257 (3.76), 330 (2.43) nm; IR (KBr)  $\nu_{\max}$  3376, 2925, 2852, 1633, 1582, 1454, 1245, 1162, 1011, 799, 745  $\text{cm}^{-1}$ ; for  $^1\text{H}$  and  $^{13}\text{C}$  NMR data, see Table S3; HRESIMS  $m/z$  363.1204  $[\text{M} + \text{Na}]^+$  (calcd for  $\text{C}_{20}\text{H}_{20}\text{O}_5\text{Na}$  363.1203).

**X-ray Crystallographic Analysis of Compound 2.**  $\text{C}_{21}\text{H}_{17}\text{O}_5$ ,  $M_r = 349.35$ , monoclinic system, space group  $P2(1)$ ; unit cell dimensions were determined to be  $a = 11.7030(6)$  Å,  $b = 9.1801(5)$  Å,  $c = 16.8493(8)$  Å,  $V = 1714.96(15)$  Å<sup>3</sup>,  $Z = 4$ ,  $D_{\text{calcd}} = 1.353$  Mg/mm<sup>3</sup>,  $\mu$  (Cu  $K\alpha$ ) = 0.797 mm<sup>-1</sup>,  $F(000) = 732$ ,  $T = 299(2)$  K, 31389 reflections measured, 5731 unique reflections ( $R_{\text{int}} = 0.05$ ) which were used in all calculations. A crystal of dimensions  $0.30 \times 0.15 \times 0.10$  mm<sup>3</sup> was selected for measurements on a Bruker D8 venture diffractometer employing APEX II CCD using Cu  $K\alpha$  radiation. APEX2 Software Suite was used for cell refinement and data reduction. The structure was refined with full-matrix least-squares calculations on  $F^2$  using SHELXL-2014/7 (Sheldrick, 2014). The final stage converged to  $R_1 = 0.0373$  ( $wR_2 = 0.0820$ ) for 4696 observed reflections [with  $I > 2\sigma(I)$ ] and 473 variable parameters,  $R_1 = 0.0516$  ( $wR_2 = 0.0896$ ) for all unique reflections, and goodness-of-fit = 1.039. The Flack parameter is 0.02(10).

**X-ray Crystallographic Analysis of Compound 3.**  $\text{C}_{21}\text{H}_{20}\text{O}_6$ ,  $M_r = 368.37$ , monoclinic system, space group  $P2(1)$ ; unit cell dimensions were determined to be  $a = 4.98480(10)$  Å,  $b = 21.1663(6)$  Å,  $c = 8.4299(2)$  Å,  $V = 872.38(4)$  Å<sup>3</sup>,  $Z = 2$ ,  $D_{\text{calcd}} = 1.402$  Mg/mm<sup>3</sup>,  $\mu$  (Cu  $K\alpha$ ) = 0.854 mm<sup>-1</sup>,  $F(000) = 388$ ,  $T = 300(2)$  K, 11835 reflections measured, 3151 unique reflections ( $R_{\text{int}} = 0.0367$ ) which were used in all calculations. A crystal of dimensions  $0.46 \times 0.17 \times 0.13$  mm<sup>3</sup> was selected for measurements on a Bruker D8 venture diffractometer employing APEX II CCD using Cu  $K\alpha$  radiation. APEX2 Software Suite was used for cell refinement and data reduction. The structure

was refined with full-matrix least-squares calculations on  $F^2$  using SHELXL-2014/7 (Sheldrick, 2014). The final stage converged to  $R_1 = 0.0336$  ( $wR_2 = 0.0852$ ) for 2983 observed reflections [with  $I > 2\sigma(I)$ ] and 256 variable parameters,  $R_1 = 0.0361$  ( $wR_2 = 0.0873$ ) for all unique reflections, and goodness-of-fit = 1.088. The Flack parameter is 0.17(7).

**X-ray Crystallographic Analysis of Compound 4.**  $C_{20}H_{14}O_5$ ,  $M_r = 334.31$ , monoclinic system, space group  $P2(1)$ ; unit cell dimensions were determined to be  $a = 9.3210(7)$  Å,  $b = 7.9839(6)$  Å,  $c = 20.5119(15)$  Å,  $V = 1518.5(2)$  Å<sup>3</sup>,  $Z = 4$ ,  $D_{\text{calcd}} = 1.462$  Mg/mm<sup>3</sup>,  $\mu$  (Cu  $K\alpha$ ) = 0.876 mm<sup>-1</sup>,  $F(000) = 696$ ,  $T = 299(2)$  K, 20936 reflections measured, 2683 unique reflections ( $R_{\text{int}} = 0.0457$ ) which were used in all calculations. A crystal of dimensions  $0.26 \times 0.18 \times 0.12$  mm<sup>3</sup> was selected for measurements on a Bruker D8 venture diffractometer employing APEX II CCD using Cu  $K\alpha$  radiation. APEX2 Software Suite was used for cell refinement and data reduction. The structure was refined with full-matrix least-squares calculations on  $F^2$  using SHELXL-2014/7 (Sheldrick, 2014). The final stage converged to  $R_1 = 0.0391$  ( $wR_2 = 0.0920$ ) for 2105 observed reflections [with  $I > 2\sigma(I)$ ] and 234 variable parameters,  $R_1 = 0.0544$  ( $wR_2 = 0.1006$ ) for all unique reflections, and goodness-of-fit = 1.021.

**X-ray Crystallographic Analysis of Compound 7.**  $C_{41}H_{41}O_{18}$ ,  $M_r = 821.74$ , monoclinic system, space group  $P2(1)$ ; unit cell dimensions were determined to be  $a = 12.7755(7)$  Å,  $b = 7.2748(3)$  Å,  $c = 20.3792(13)$  Å,  $V = 1811.55(17)$  Å<sup>3</sup>,  $Z = 2$ ,  $D_{\text{calcd}} = 1.506$  Mg/mm<sup>3</sup>,  $\mu$  (Cu  $K\alpha$ ) = 1.014 mm<sup>-1</sup>,  $F(000) = 862$ ,  $T = 293(2)$  K, 5942 reflections measured, 4043 unique reflections ( $R_{\text{int}} = 0.0409$ ) which were used in all calculations. A crystal of dimensions  $0.26 \times 0.12 \times 0.10$  mm<sup>3</sup> was selected for measurements on a Bruker APEX DUO diffractometer employing APEX II CCD using Cu  $K\alpha$  radiation. APEX2 Software Suite was used for cell refinement and data reduction.

The structure was refined with full-matrix least-squares calculations on  $F^2$  using SHELXL-97 (Sheldrick, 1997). The final stage converged to  $R_1 = 0.0564$  ( $wR_2 = 0.1014$ ) for 2477 observed reflections [with  $I > 2\sigma(I)$ ] and 534 variable parameters,  $R_1 = 0.1034$  ( $wR_2 = 0.1147$ ) for all unique reflections, and goodness-of-fit = 1.043. The Flack parameter is 0.3(4).

Crystallographic data for these structures have been deposited with the Cambridge Crystallographic Data Centre as CCDC 1441582 for **2**, CCDC 1441583 for **3**, CCDC 1441584 for **4**, and CCDC 1441585 for **7**. Copies of the data can be obtained free of charge at [www.ccdc.cam.ac.uk/conts/retrieving.html](http://www.ccdc.cam.ac.uk/conts/retrieving.html) (or from the Cambridge Crystallographic Data Centre, 12 Union Road, Cambridge CB2 1EZ, UK; fax: (+44) 1223-336-033; e-mail: [deposit@ccdc.cam.ac.uk](mailto:deposit@ccdc.cam.ac.uk)).

**Table S1.  $^1\text{H}$  (600 MHz) and  $^{13}\text{C}$  (150 MHz) NMR Data for Compounds 1-4 in  $\text{DMSO-}d_6$**

| Position            | 1                     |                                     | 2                     |                                     | 3                     |                                     | 4                     |                                     |
|---------------------|-----------------------|-------------------------------------|-----------------------|-------------------------------------|-----------------------|-------------------------------------|-----------------------|-------------------------------------|
|                     | $d_{\text{C}}$ , type | $d_{\text{H}}$ , mult. ( $J$ in Hz) | $d_{\text{C}}$ , type | $d_{\text{H}}$ , mult. ( $J$ in Hz) | $d_{\text{C}}$ , type | $d_{\text{H}}$ , mult. ( $J$ in Hz) | $d_{\text{C}}$ , type | $d_{\text{H}}$ , mult. ( $J$ in Hz) |
| 1                   | 62.9, CH              | 4.89, br s                          | 73.0, CH              | 4.62, d (3.0)                       | 71.5, CH              | 4.78, d (7.2)                       | 204.1, C              |                                     |
| 2                   | 65.9, CH              | 3.82, br d(10.8)                    | 66.7, CH              | 3.93, br d (10.2)                   | 68.5, CH              | 3.94, t (7.8)                       | 34.0, $\text{CH}_2$   | 2.77, t (6.0)                       |
| 3a                  | 32.8, $\text{CH}_2$   | 2.24, m                             | 33.7, $\text{CH}_2$   | 2.22, t (12.6)                      | 36.2, $\text{CH}_2$   | 2.34, dd (13.2, 3.6)                | 28.9, $\text{CH}_2$   | 2.38, t(6.0)                        |
| 3b                  |                       | 2.07, m                             |                       | 2.12, dd (12.6, 3.6)                |                       | 1.93, dd (13.2, 10.8)               |                       |                                     |
| 4                   | 101.2, C              |                                     | 101.0, C              |                                     | 100.0, C              |                                     | 98.5, C               |                                     |
| 5                   | 117.6, CH             | 7.13, d (7.8)                       | 118.0, CH             | 7.13, d (7.8)                       | 117.7, CH             | 7.17, d (7.8)                       | 116.6, CH             | 7.19, m                             |
| 6                   | 128.9, CH             | 7.25, t (7.8)                       | 129.3, CH             | 7.27, d (7.8)                       | 128.8, CH             | 7.27, t (7.8)                       | 121.5, CH             | 7.19, m                             |
| 7                   | 116.1, CH             | 6.96, d (7.8)                       | 116.1, CH             | 6.99, d (7.8)                       | 116.9, CH             | 6.93, d (7.8)                       | 147.3, C              |                                     |
| 8                   | 155.6, C              |                                     | 155.5, C              |                                     | 156.4, C              |                                     | 150.3, C              |                                     |
| 9                   | 125.5, C              |                                     | 123.7, C              |                                     | 123.9, C              |                                     | 115.5, C              |                                     |
| 10                  | 135.2, C              |                                     | 135.3, C              |                                     | 135.1, C              |                                     | 130.1, C              |                                     |
| 1'                  | 147.8, C              |                                     | 147.7, C              |                                     | 147.5, C              |                                     | 147.2, C              |                                     |
| 2'                  | 109.3, CH             | 7.01, d (7.8)                       | 109.4, CH             | 7.02, d (7.8)                       | 109.3, CH             | 6.98, t (8.4)                       | 109.4, CH             | 7.06, d (7.8)                       |
| 3'                  | 127.7, CH             | 7.51, m                             | 127.8, CH             | 7.50, q (8.4)                       | 127.7, CH             | 7.51, m                             | 127.8, CH             | 7.52, t (7.8)                       |
| 4'                  | 120.4, CH             | 7.61, m                             | 120.5, CH             | 7.59, dd (8.4, 3.0)                 | 120.4, CH             | 7.59, d (8.4)                       | 120.7, CH             | 7.62, d (7.8)                       |
| 5'                  | 120.4, CH             | 7.61, m                             | 120.5, CH             | 7.59, dd (8.4, 3.0)                 | 120.4, CH             | 7.59, d (8.4)                       | 120.7, CH             | 7.62, d (7.8)                       |
| 6'                  | 127.7, CH             | 7.51, m                             | 127.8, CH             | 7.50, q (8.4)                       | 127.7, CH             | 7.51, m                             | 127.8, CH             | 7.52, t (7.8)                       |
| 7'                  | 109.4, CH             | 6.93, d (7.8)                       | 109.5, CH             |                                     | 109.5, CH             | 6.98, t (8.4)                       | 109.4, CH             | 6.98, t (8.4)                       |
| 8'                  | 147.6, C              |                                     | 147.7, C              |                                     | 147.5, C              |                                     | 147.2, C              |                                     |
| 9'                  | 112.9, C              |                                     | 112.9, C              |                                     | 112.9, C              |                                     | 112.8, C              |                                     |
| 10'                 | 133.8, C              |                                     | 133.8, C              |                                     | 133.7, C              |                                     | 133.7, C              |                                     |
| OCH <sub>3</sub> -1 |                       |                                     | 59.7, $\text{CH}_3$   | 3.52, s                             |                       |                                     |                       |                                     |
| HO-C(8)             |                       | 9.75, s                             |                       | 9.93, s                             |                       | 9.83, br s                          |                       |                                     |

**Table S2. <sup>1</sup>H (600 MHz) and <sup>13</sup>C (150 MHz) NMR Data for Compounds 7-10 in DMSO-*d*<sub>6</sub>**

| Position | 7                            |                                                 | 8                            |                                                 | 9                            |                                                 | 10                           |                                                 |
|----------|------------------------------|-------------------------------------------------|------------------------------|-------------------------------------------------|------------------------------|-------------------------------------------------|------------------------------|-------------------------------------------------|
|          | <i>d</i> <sub>C</sub> , type | <i>d</i> <sub>H</sub> , mult. ( <i>J</i> in Hz) | <i>d</i> <sub>C</sub> , type | <i>d</i> <sub>H</sub> , mult. ( <i>J</i> in Hz) | <i>d</i> <sub>C</sub> , type | <i>d</i> <sub>H</sub> , mult. ( <i>J</i> in Hz) | <i>d</i> <sub>C</sub> , type | <i>d</i> <sub>H</sub> , mult. ( <i>J</i> in Hz) |
| 1        | 65.8, CH                     | 5.32, s                                         | 66.5, CH                     | 5.29, d (1.8)                                   | 69.8, CH                     | 4.21, s                                         | 205.9, C                     |                                                 |
| 2a       | 54.1, CH                     | 3.65, m                                         | 50.6, CH                     | 3.45, q (2.4)                                   | 65.0, CH                     | 4.85, s                                         | 33.4, CH <sub>2</sub>        | 3.06, m                                         |
| 2b       |                              |                                                 |                              |                                                 |                              |                                                 |                              | 2.59, m                                         |
| 3a       | 54.4, CH                     | 3.65, m                                         | 53.4, CH                     | 3.65, d (4.8)                                   | 71.3, CH                     | 4.36, d (3.0)                                   | 32.2, CH <sub>2</sub>        | 2.39, m                                         |
| 3b       |                              |                                                 |                              |                                                 |                              |                                                 |                              | 2.14, m                                         |
| 4        | 66.9, C                      |                                                 | 69.4, C                      |                                                 | 69.7, C                      |                                                 | 66.2, C                      |                                                 |
| 5        | 124.1, C                     |                                                 | 123.6, C                     |                                                 | 123.8, C                     |                                                 | 123.5, C                     |                                                 |
| 6        | 124.3, CH                    | 7.51, d (8.4)                                   | 124.1, CH                    | 7.49, d (8.4)                                   | 124.3, CH                    | 7.47, d (8.4)                                   | 132.7, CH                    | 7.93, d (8.4)                                   |
| 7        | 116.3, CH                    | 6.84, d (8.4)                                   | 116.0, CH                    | 6.77, d (8.4)                                   | 114.5, CH                    | 6.87, d (8.4)                                   | 117.4, CH                    | 7.02, d (8.4)                                   |
| 8        | 156.0, C                     |                                                 | 156.5, C                     |                                                 | 156.2, C                     |                                                 | 160.8, C                     |                                                 |
| 9        | 118.4, C                     |                                                 | 120.1, C                     |                                                 | 122.4, C                     |                                                 | 114.0, C                     |                                                 |
| 10       | 133.0, C                     |                                                 | 132.3, C                     |                                                 | 132.9, C                     |                                                 | 140.4, C                     |                                                 |
| 1'       | 206.1, C                     |                                                 | 206.5, C                     |                                                 | 206.3, C                     |                                                 | 206.1, C                     |                                                 |
| 2'a      | 37.2, CH <sub>2</sub>        | 2.91, m                                         | 33.3, CH <sub>2</sub>        | 3.12, m                                         | 33.3, CH <sub>2</sub>        | 3.12, m                                         | 37.3, CH <sub>2</sub>        | 2.81, m                                         |
| 2'b      |                              | 2.68, m                                         |                              | 2.60, m                                         |                              | 2.64, m                                         |                              | 2.70, m                                         |
| 3'a      | 21.9, CH <sub>2</sub>        | 2.44, m                                         | 28.2, CH <sub>2</sub>        | 2.56, m                                         | 28.1, CH <sub>2</sub>        | 2.66, m                                         | 21.0, CH <sub>2</sub>        | 2.28, m                                         |
| 3'b      |                              | 2.21, m                                         |                              | 2.35, m                                         |                              | 2.20, m                                         |                              | 2.14, m                                         |
| 4'       | 40.3, CH                     | 3.03, dd (12.0, 4.4)                            | 70.5, C                      |                                                 | 71.8, C                      |                                                 | 42.8, CH                     | 2.93, dd (12.0, 4.2)                            |
| 5'       | 124.1, C                     |                                                 | 123.7, C                     |                                                 | 124.6, C                     |                                                 | 123.1, C                     |                                                 |
| 6'       | 117.2, CH                    | 7.47, s                                         | 117.4, CH                    | 7.43, s                                         | 117.6, CH                    | 7.45, s                                         | 117.4, CH                    | 7.53, s                                         |
| 7'       | 144.2, C                     |                                                 | 145.6, C                     |                                                 | 145.6, C                     |                                                 | 144.4, C                     |                                                 |
| 8'       | 149.9, C                     |                                                 | 149.6, C                     |                                                 | 149.0, C                     |                                                 | 150.2, C                     |                                                 |
| 9'       | 116.7, C                     |                                                 | 115.5, C                     |                                                 | 115.5, C                     |                                                 | 116.6, C                     |                                                 |
| 10'      | 128.6, C                     |                                                 | 128.9, C                     |                                                 | 128.2, C                     |                                                 | 129.7, C                     |                                                 |
| HO-C(4)  |                              | 5.21, s                                         |                              | 5.35, s                                         |                              | 5.41, s                                         |                              | 5.15, s                                         |
| HO-C(8)  |                              |                                                 |                              |                                                 |                              |                                                 |                              | 12.68, s                                        |
| HO-C(8') |                              | 12.56, s                                        |                              | 12.64, s                                        |                              |                                                 |                              |                                                 |

**Table S3. <sup>1</sup>H (600 MHz) and <sup>13</sup>C (150 MHz) NMR Data for Compounds 11-13 in DMSO-*d*<sub>6</sub>**

| Position | 11                           |                                                 | 12                           |                                                 | 13                           |                                                 |
|----------|------------------------------|-------------------------------------------------|------------------------------|-------------------------------------------------|------------------------------|-------------------------------------------------|
|          | <i>d</i> <sub>C</sub> , type | <i>d</i> <sub>H</sub> , mult. ( <i>J</i> in Hz) | <i>d</i> <sub>C</sub> , type | <i>d</i> <sub>H</sub> , mult. ( <i>J</i> in Hz) | <i>d</i> <sub>C</sub> , type | <i>d</i> <sub>H</sub> , mult. ( <i>J</i> in Hz) |
| 1        | 195.61, C                    |                                                 | 60.0, CH                     | 4.83, d (2.4)                                   | 59.7, CH                     | 4.71, d (3.0)                                   |
| 2a       | 36.6, CH <sub>2</sub>        | 2.57, m                                         | 29.8, CH <sub>2</sub>        | 1.84, m                                         | 26.2, CH <sub>2</sub>        | 1.93, m                                         |
| 2b       |                              | 2.45, m                                         |                              | 1.68, m                                         |                              | 1.61, m                                         |
| 3a       | 31.2, CH <sub>2</sub>        | 2.12, m                                         | 26.8, CH <sub>2</sub>        | 1.96, m                                         | 26.0, CH <sub>2</sub>        | 2.10, m                                         |
| 3b       |                              | 1.86, m                                         |                              | 1.77, m                                         |                              | 1.59, m                                         |
| 4        | 66.5, CH                     | 4.68, m                                         | 67.9, CH                     | 4.45, m                                         | 65.1, CH                     | 4.52, d (3.0)                                   |
| 5        | 156.5, C                     |                                                 | 155.3, C                     |                                                 | 122.4, CH                    | 6.94, d (7.8)                                   |
| 6        | 119.8, CH                    | 7.23, d (7.8)                                   | 119.4, CH                    | 7.18, d (7.8)                                   | 127.9, CH                    | 7.24, t (7.8)                                   |
| 7        | 133.9, CH                    | 7.56, t (7.8)                                   | 127.7, CH                    | 7.25, t (7.8)                                   | 112.3, CH                    | 7.13, d (7.8)                                   |
| 8        | 115.6, CH                    | 7.33, d (7.8)                                   | 111.4, CH                    | 7.09, d (7.8)                                   | 155.1, C                     |                                                 |
| 9        | 149.8, C                     |                                                 | 143.3, C                     |                                                 | 128.1, C                     |                                                 |
| 10       | 121.8, C                     |                                                 | 127.9, C                     |                                                 | 140.1, C                     |                                                 |
| 1'       | 205.1, C                     |                                                 | 204.7, C                     |                                                 | 205.3, C                     |                                                 |
| 2'a      | 33.9, CH <sub>2</sub>        | 3.12, m                                         | 34.8, CH <sub>2</sub>        | 2.89, m                                         | 33.9, CH <sub>2</sub>        | 3.13, m                                         |
| 2'b      |                              | 2.75, m                                         |                              | 2.84, m                                         |                              | 2.70, m                                         |
| 3'a      | 27.5, CH <sub>2</sub>        | 2.36, m                                         | 27.8, CH <sub>2</sub>        | 2.38, m                                         | 27.0, CH <sub>2</sub>        | 2.37, m                                         |
| 3'b      |                              | 2.27, m                                         |                              | 2.16, m                                         |                              | 2.34, m                                         |
| 4'       | 73.4, CH                     | 5.74, m                                         | 72.6, CH                     | 5.73, dd (8.4, 3.0)                             | 72.3, CH                     | 5.72, t (4.2)                                   |
| 5'       | 119.0, CH                    | 7.09, d (7.8)                                   | 118.1, CH                    | 7.33, d (7.8)                                   | 118.8, CH                    | 7.00, d (7.8)                                   |
| 6'       | 136.6, CH                    | 7.53, t (7.8)                                   | 136.9, CH                    | 7.57, t (7.8)                                   | 136.9, CH                    | 7.57, t (7.8)                                   |
| 7'       | 117.5, CH                    | 6.95, d (7.8)                                   | 116.8, CH                    | 6.93, d (7.8)                                   | 117.3, CH                    | 6.96, d (7.8)                                   |
| 8'       | 161.6, C                     |                                                 | 161.6, C                     |                                                 | 161.7, C                     |                                                 |
| 9'       | 115.5, C                     |                                                 | 115.4, C                     |                                                 | 115.5, C                     |                                                 |
| 10'      | 142.6, C                     |                                                 | 144.3, C                     |                                                 | 143.3, C                     |                                                 |
| HO-C(8') |                              | 12.43, s                                        |                              | 12.43, s                                        |                              | 12.46, s                                        |



**Table S4. *In vitro* susceptibilities of compounds in *Phialocephala fortinii* and FLC acting alone and in combination against *C. albicans* by checkerboard microdilution assay**

| Compounds | MIC <sub>80</sub> (µg/ml) |           |                |           | FICI   | Interpretation <sup>a</sup> |
|-----------|---------------------------|-----------|----------------|-----------|--------|-----------------------------|
|           | Alone                     |           | In combination |           |        |                             |
|           | Azole                     | Compounds | Azole          | Compounds |        |                             |
| <b>1</b>  | >256                      | >128      | 2              | 32        | <0.258 | SYN                         |
| <b>2</b>  | >256                      | >128      | 2              | 32        | <0.258 | SYN                         |
| <b>3</b>  | >256                      | >128      | 2              | 16        | <0.133 | SYN                         |
| <b>4</b>  | >256                      | >128      | 1              | 32        | <0.254 | SYN                         |
| <b>5</b>  | >256                      | >128      | 1              | 32        | <0.254 | SYN                         |
| <b>6</b>  | >256                      | >128      | 4              | 32        | <0.266 | SYN                         |
| <b>7</b>  | >256                      | >128      | 1              | 16        | <0.129 | SYN                         |
| <b>8</b>  | >256                      | >128      | 2              | 16        | <0.133 | SYN                         |
| <b>9</b>  | >256                      | >128      | 1              | 16        | <0.129 | SYN                         |
| <b>10</b> | >256                      | >128      | 1              | 16        | <0.129 | SYN                         |
| <b>11</b> | >256                      | >128      | >128           | >64       | >1     | IND                         |
| <b>12</b> | >256                      | >128      | >128           | >64       | >1     | IND                         |
| <b>13</b> | >256                      | >128      | >128           | >64       | >1     | IND                         |
| <b>14</b> | >256                      | >128      | >128           | >64       | >1     | IND                         |
| <b>15</b> | >256                      | >128      | >128           | >64       | >1     | IND                         |

MIC, minimum inhibitory concentration; FICI, fraction inhibited concentration index.

<sup>a</sup> SYN, synergism; IND, indifference. SYN was defined as a FICI of  $\leq 0.5$ , antagonism was defined as a FICI of  $> 4.0$ .

**Table S5. *C. albicans* strains used in this study**

| Strains  | Genotype                                                                                                                     | Source                                              |
|----------|------------------------------------------------------------------------------------------------------------------------------|-----------------------------------------------------|
| DSY448   | $\Delta cdr1::hisG-URA3-hisG/\Delta cdr1::hisG$                                                                              | Reference 5                                         |
| DSY653   | $\Delta cdr2::hisG-URA3-hisG/\Delta cdr2::hisG$                                                                              | Reference 6                                         |
| DSY465   | $\Delta mdr1::hisG-URA3-hisG/\Delta mdr1::hisG$                                                                              | Reference 5                                         |
| DSY659   | $\Delta cdr1::hisG/\Delta cdr1::hisG \Delta cdr2::hisG-URA3-hisG/\Delta cdr2::hisG$                                          | Reference 6                                         |
| DSY1050  | $\Delta cdr1::hisG/\Delta cdr1::hisG \Delta cdr2::hisG/\Delta cdr2::hisG$<br>$\Delta mdr1::hisG-URA3-hisG/\Delta mdr1::hisG$ | Reference 7                                         |
| YEM13    | hyperexpressing <i>MDR1</i>                                                                                                  | Reference 8                                         |
| YEM15    | hyperexpressing <i>CDR1</i> and <i>CDR2</i>                                                                                  | Reference 8                                         |
| 24D      | <i>C. albicans</i> FLC-resistant isolate                                                                                     | From hospital of Stomatology in Shandong university |
| 28I      | <i>C. albicans</i> FLC-resistant isolate                                                                                     | From hospital of Stomatology in Shandong university |
| CA10     | <i>C. albicans</i> FLC-resistant isolate                                                                                     | From hospital of Stomatology in Shandong university |
| CA406    | <i>C. albicans</i> FLC-resistant isolate                                                                                     | From hospital of Stomatology in Shandong university |
| CA417    | <i>C. albicans</i> FLC-resistant isolate                                                                                     | From hospital of Stomatology in Shandong university |
| CA631    | <i>C. albicans</i> FLC-resistant isolate                                                                                     | From hospital of Stomatology in Shandong university |
| NPC-T001 | <i>C. tropicalis</i> FLC-resistant isolate                                                                                   | From hospital of Stomatology in Shandong university |

**Table S6. The primers used in this study.**

| Primers            | Sequences (5'-3')      |
|--------------------|------------------------|
| 18S-F              | AATTACCCAATCCCGACAC    |
| 18S-R              | TGCAACAACCTTTAATATACGC |
| <i>CDR1</i> -F     | TAACACTTATGGTTTCCACAT  |
| <i>CDR1</i> -R     | AGCATAAGTTTCTCTGTCGA   |
| <i>CDR2</i> -F     | GAGTGTTGGTGATACTTTGG   |
| <i>CDR2</i> -R     | CACTCAAAGAAGCTTCAGCA   |
| <i>MDR1</i> -F     | AGATAATCAAGGTGAACCCAA  |
| <i>MDR1</i> -R     | GCTGATCCCATATAAACTGAA  |
| CT- <i>ACT1</i> -F | ATGGACGGGGGTATGTTTCA   |
| CT- <i>ACT1</i> -R | GACATAAGTAATTTCCAATGTG |
| CT- <i>MDR1</i> -F | CCCAGAAGTTTTTCATTCCA   |
| CT- <i>MDR1</i> -R | CCCCAAGCAACAGGATAAT    |

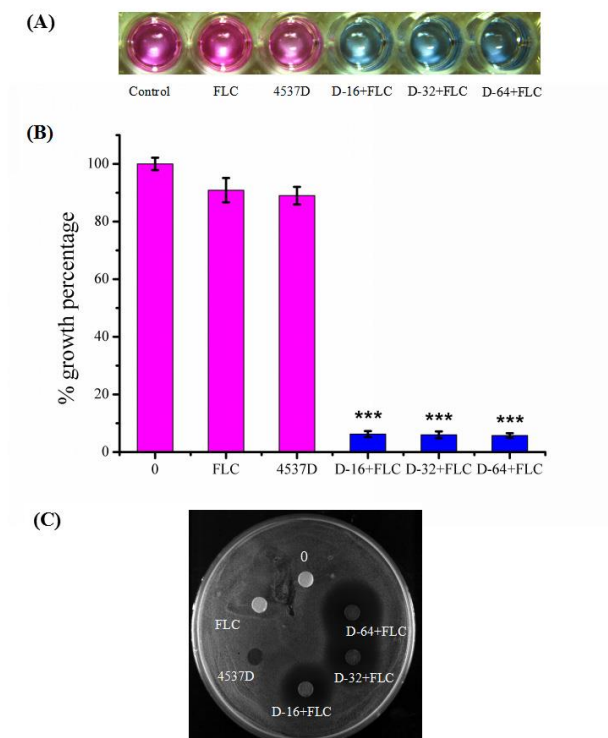

**Figure S1.** The potent activity of the hit enhancing the efficacy of FLC against the azole-resistant *C. albicans* isolate 24D. **(A,B)** The Alarm Blue assay results. Cells were stained with Alamar Blue for 2 hours in dark after treated with drugs for 48h, the supernatant would become pink when the cells proliferate, otherwise turn into blue **(A)** and the growth of *C.albicans* was measured with a spectrophotometer at 570 nm**(B)**. The test was performed in quadruplicate. **(C)** The disk diffusion assay results. The assays were performed by plating the individual test organism 24D ( $1.5 \times 10^6$ ) on Mueller Hinton agar (MHA) medium supplemented with 2% glucose. Cellulose disks impregnated with FLC (4  $\mu\text{g}$ ), extract (64  $\mu\text{g}$ ) and combination of each agent (4  $\mu\text{g}$  FLC and 16  $\mu\text{g}$  extract; 4  $\mu\text{g}$  FLC and 32  $\mu\text{g}$  extract; 4  $\mu\text{g}$  FLC and 64  $\mu\text{g}$  extract) were placed onto MHA agar plates. Each plate was incubated at 30  $^{\circ}\text{C}$  for 48 h for the agar diffusion assay.

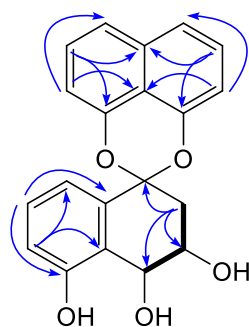

**Figure S2.** Key  $^1\text{H}$ - $^1\text{H}$  COSY (bold lines), HMBC (H $\rightarrow$ C) correlations for compound **1**.

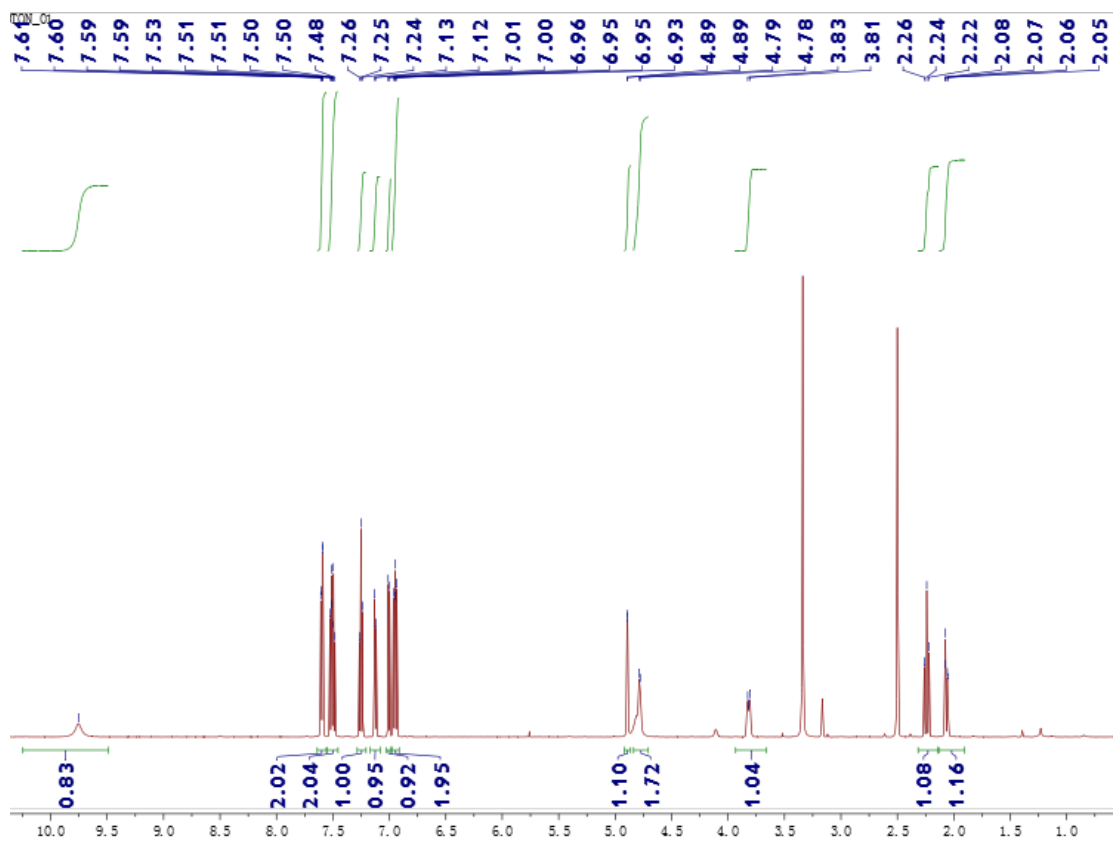

**Figure S3.**  $^1\text{H}$  NMR spectrum (600 MHz) of **1** in  $\text{DMSO-}d_6$ .

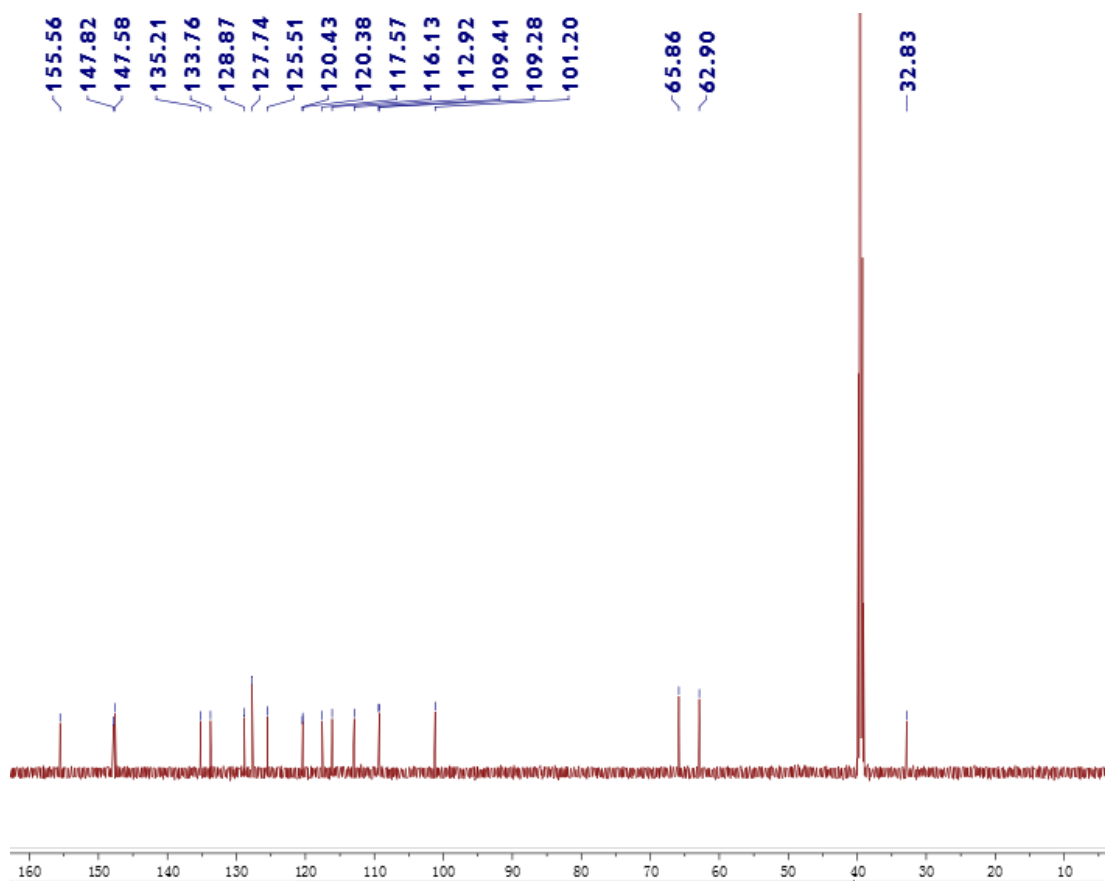

Figure S4.  $^{13}\text{C}$  NMR spectrum (150 MHz) of **1** in  $\text{DMSO-}d_6$ .

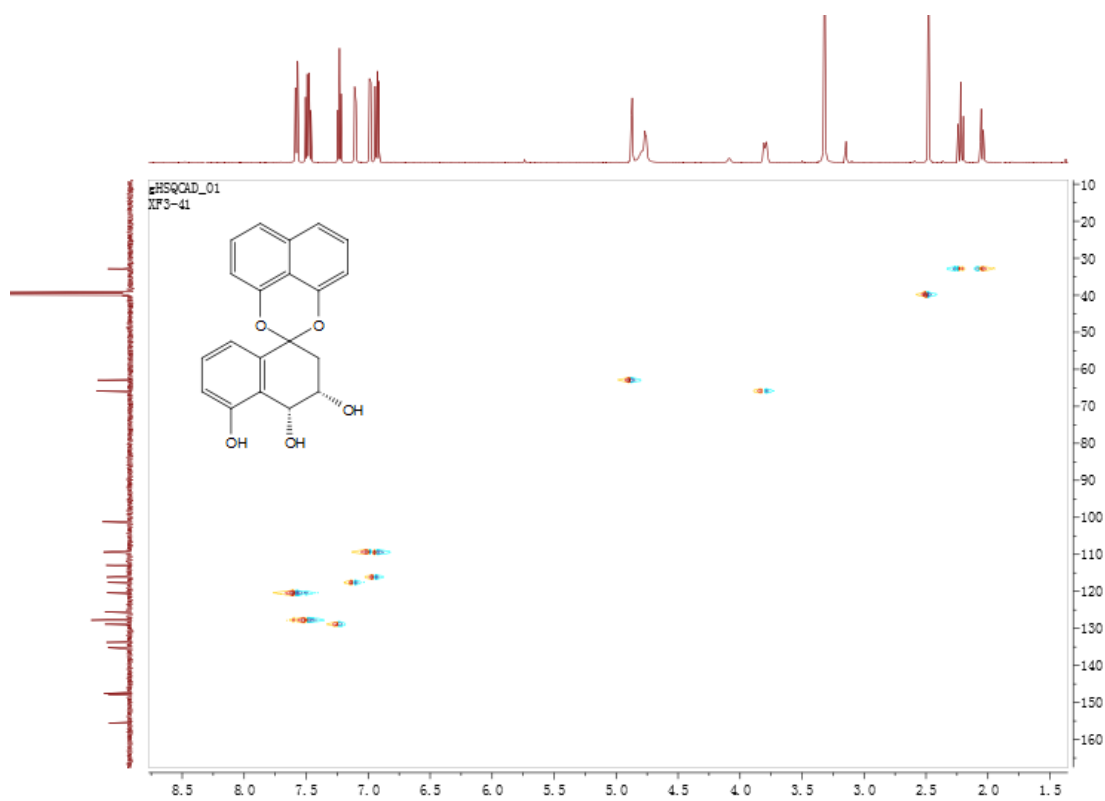

Figure S5. HSQC spectrum (600 MHz) of **1** in  $\text{DMSO-}d_6$ .

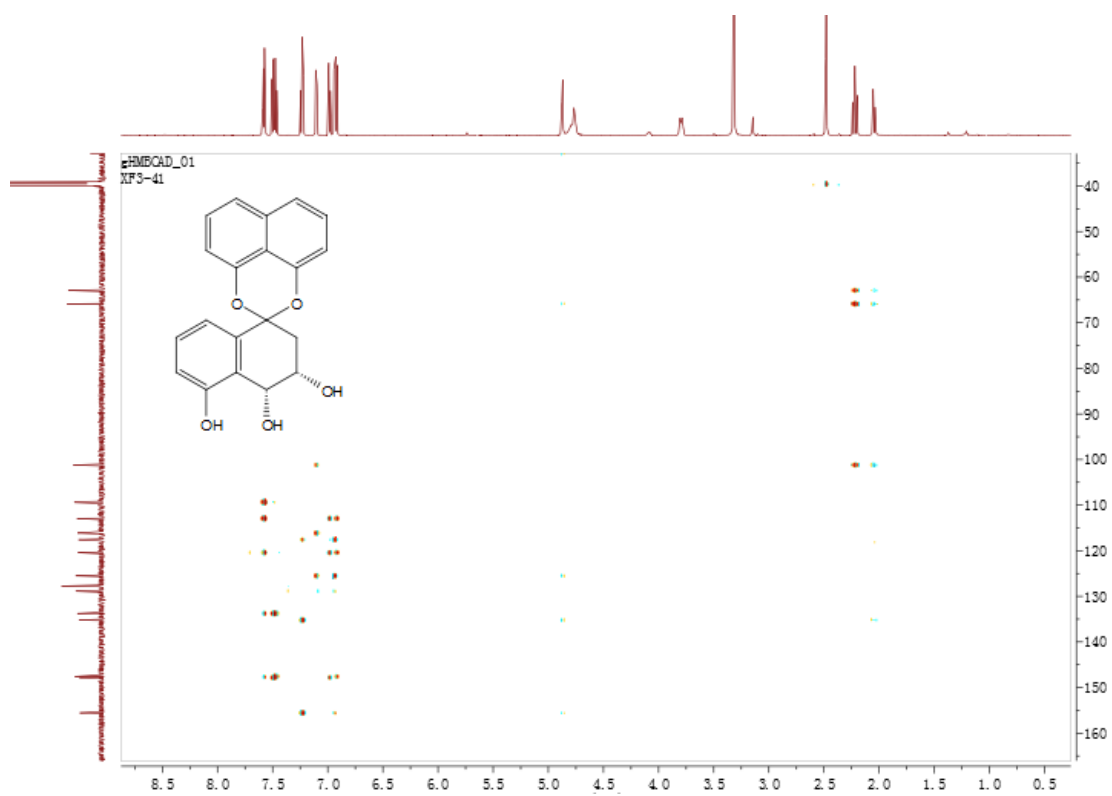

**Figure S6.** HMBC spectrum (600 MHz) of **1** in DMSO- $d_6$ .

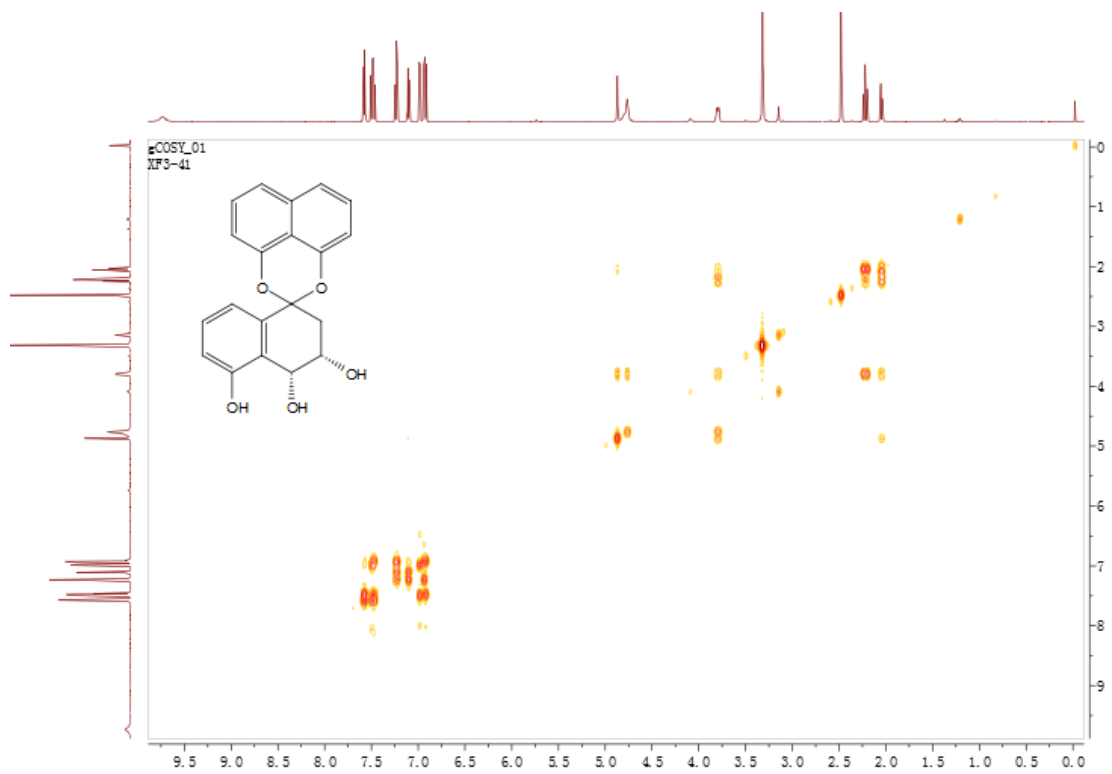

**Figure S7.**  $^1\text{H}$ - $^1\text{H}$  COSY spectrum (600 MHz) of **1** in DMSO- $d_6$ .

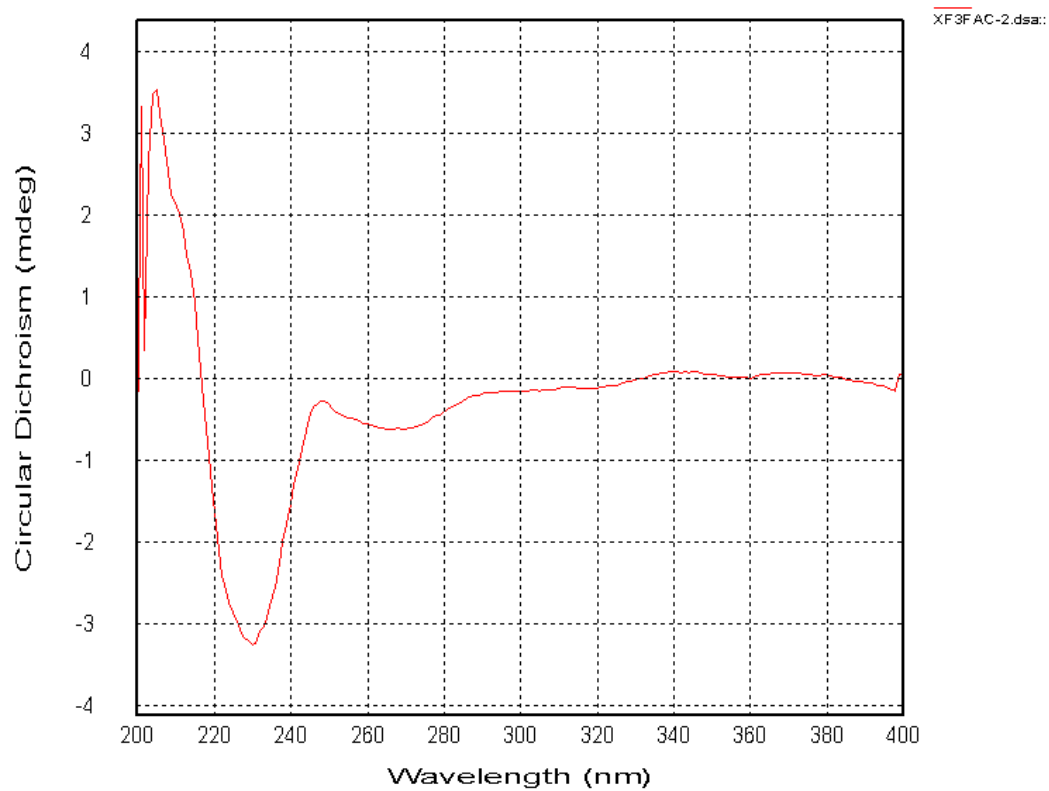

**Figure S8.** CD spectrum of **1**.

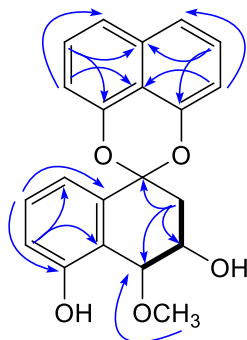

**Figure S9.** Key  $^1\text{H}$ - $^1\text{H}$  COSY (bold lines), HMBC (H $\rightarrow$ C) correlations for compound **2**.



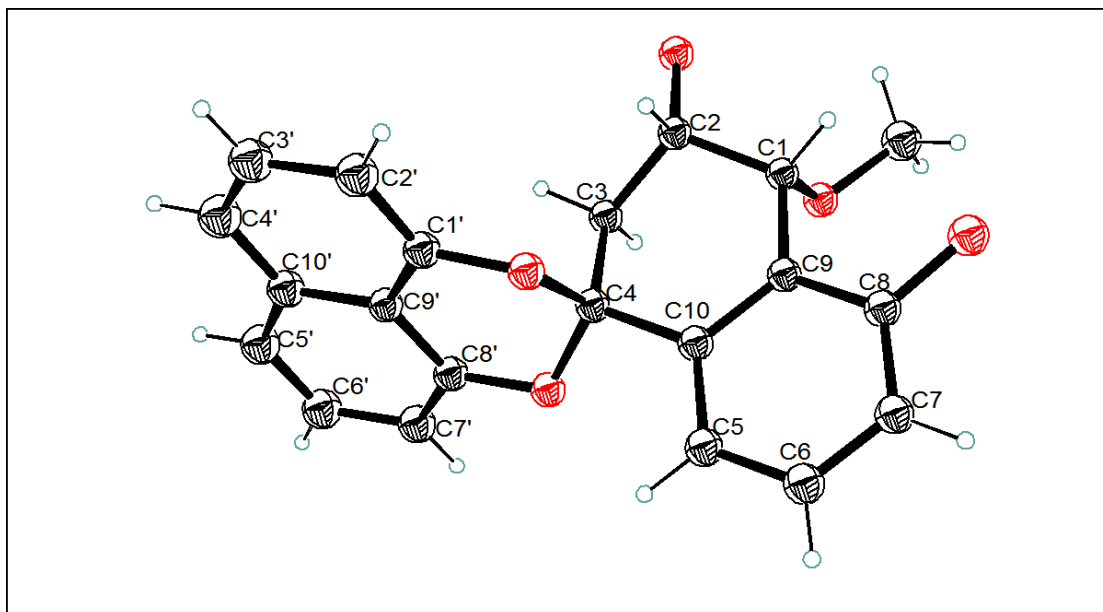

Figure S10. X-ray crystallographic structure of **2**.

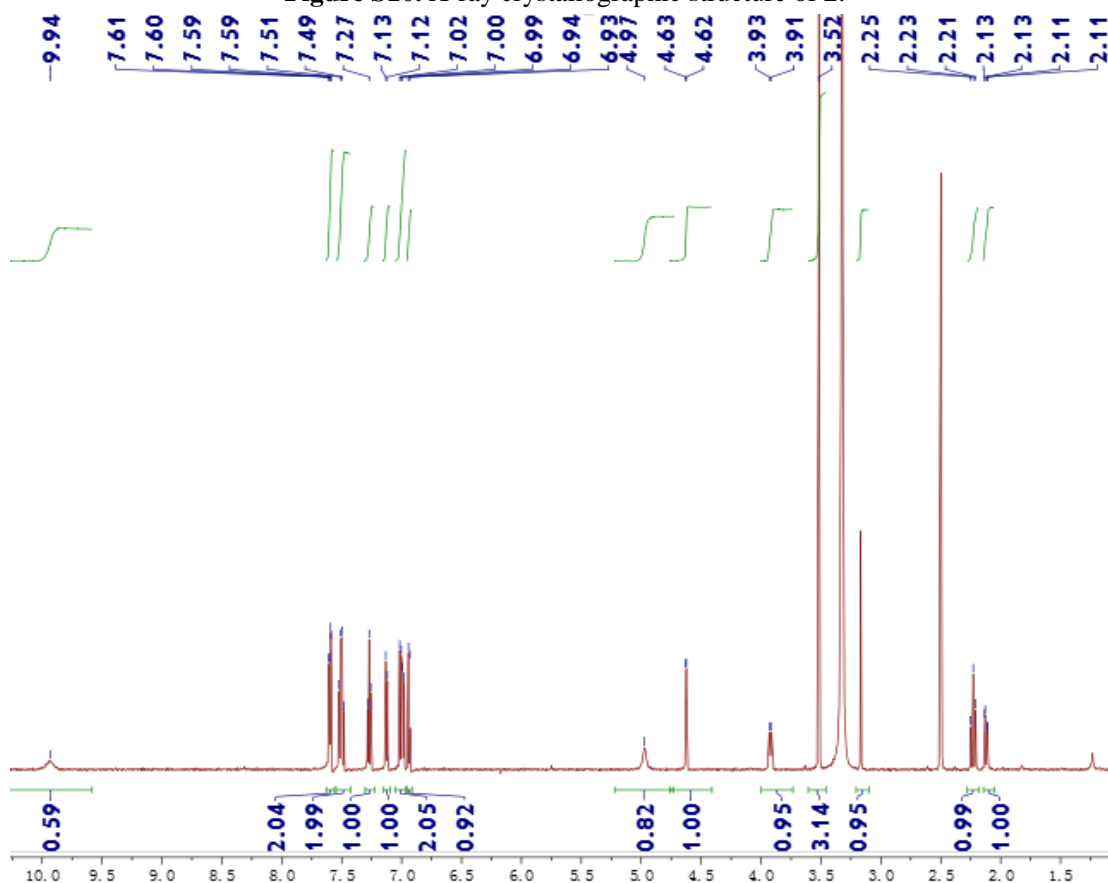

Figure S11.  $^1\text{H}$  NMR spectrum (600 MHz) of **2** in  $\text{DMSO-}d_6$ .

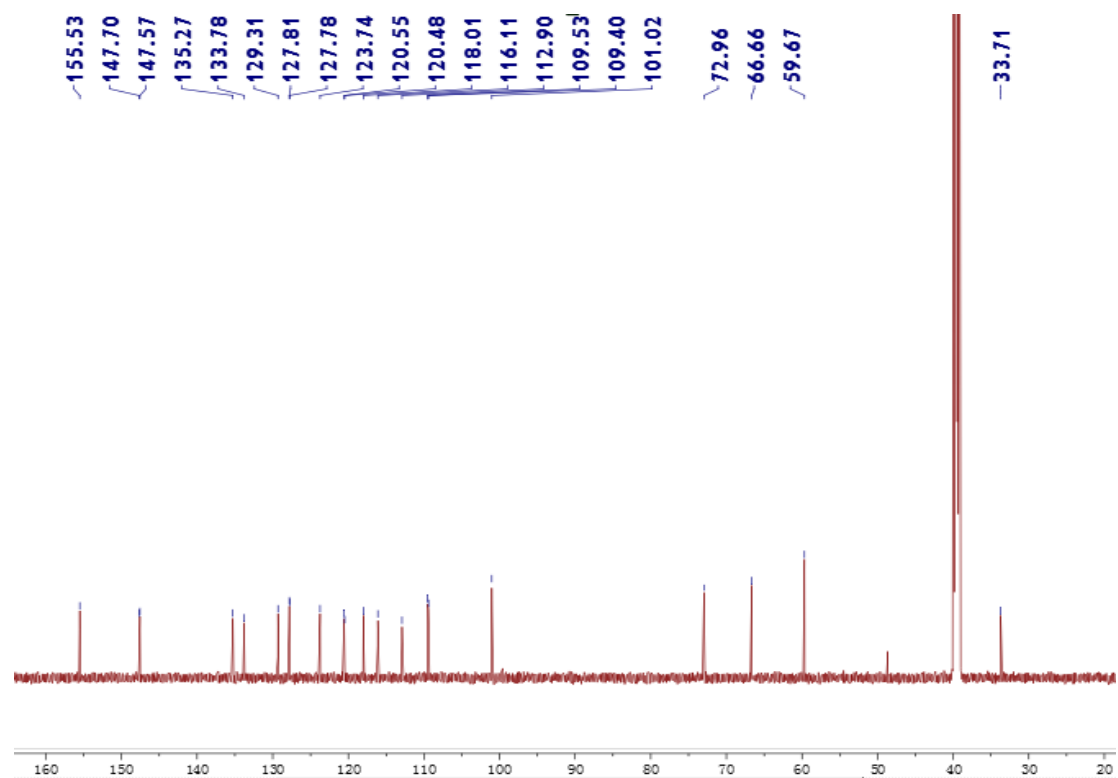

Figure S12.  $^{13}\text{C}$  NMR spectrum (150 MHz) of **2** in  $\text{DMSO-}d_6$ .

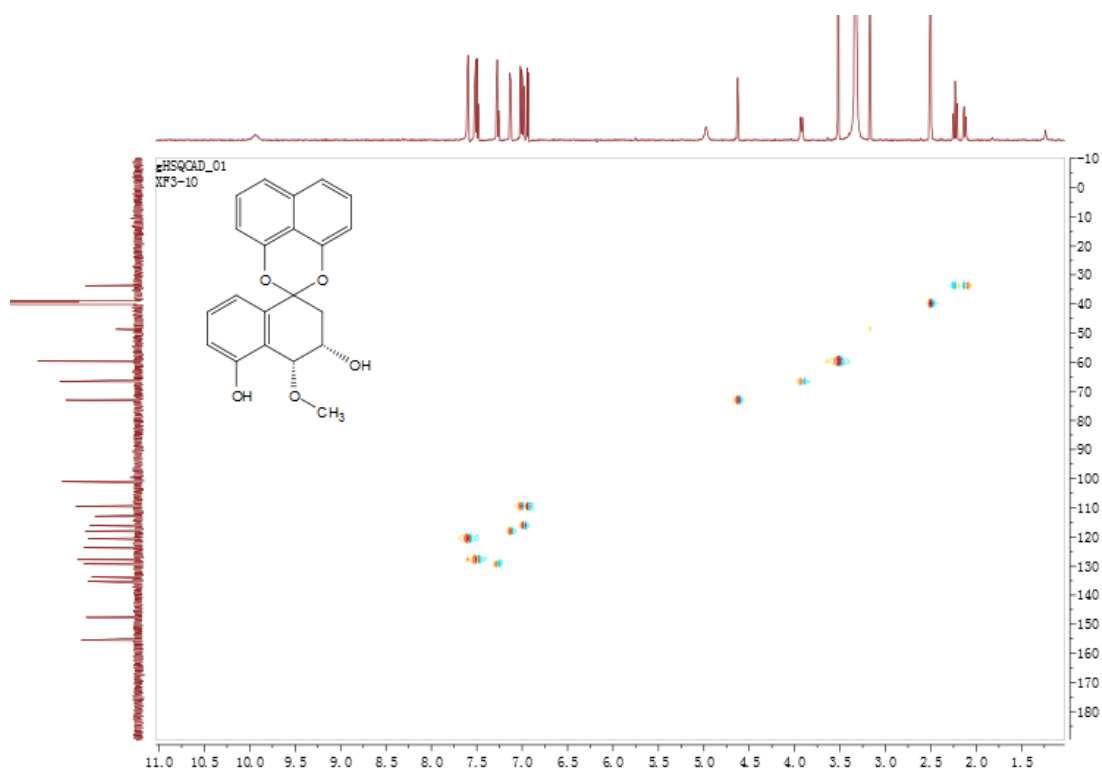

Figure S13. HSQC spectrum (600 MHz) of **2** in  $\text{DMSO-}d_6$ .

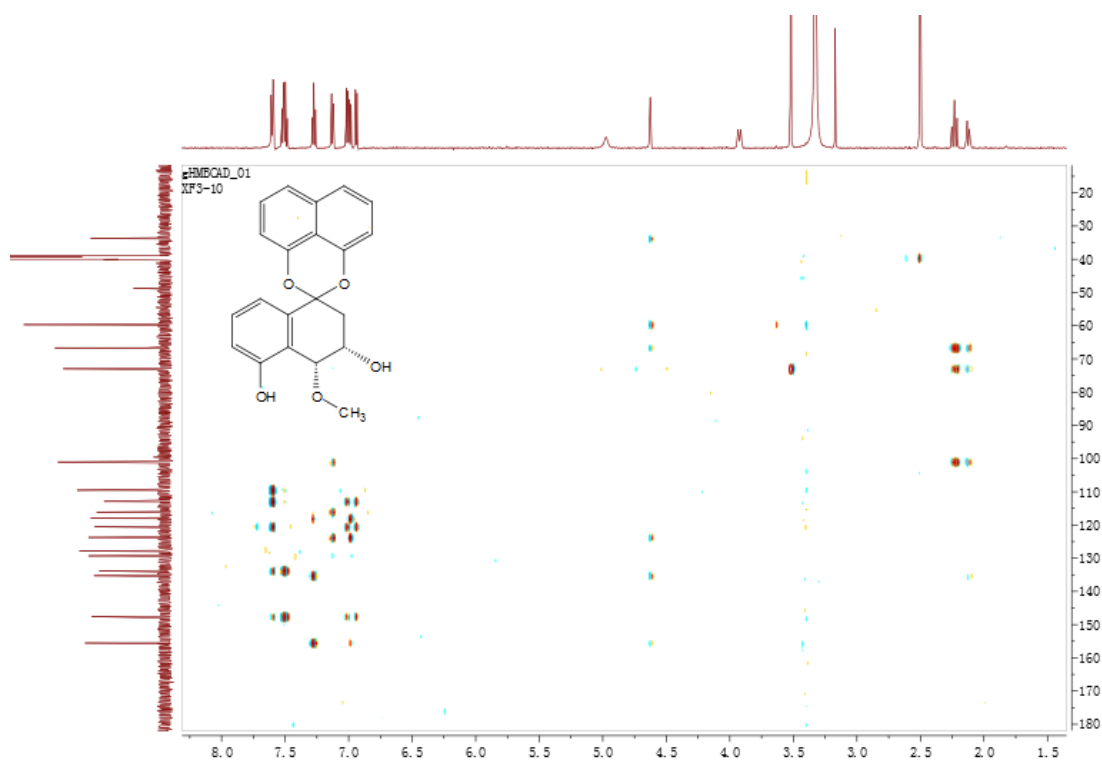

**Figure S14.** HMBC spectrum (600 MHz) of **2** in DMSO-*d*<sub>6</sub>.

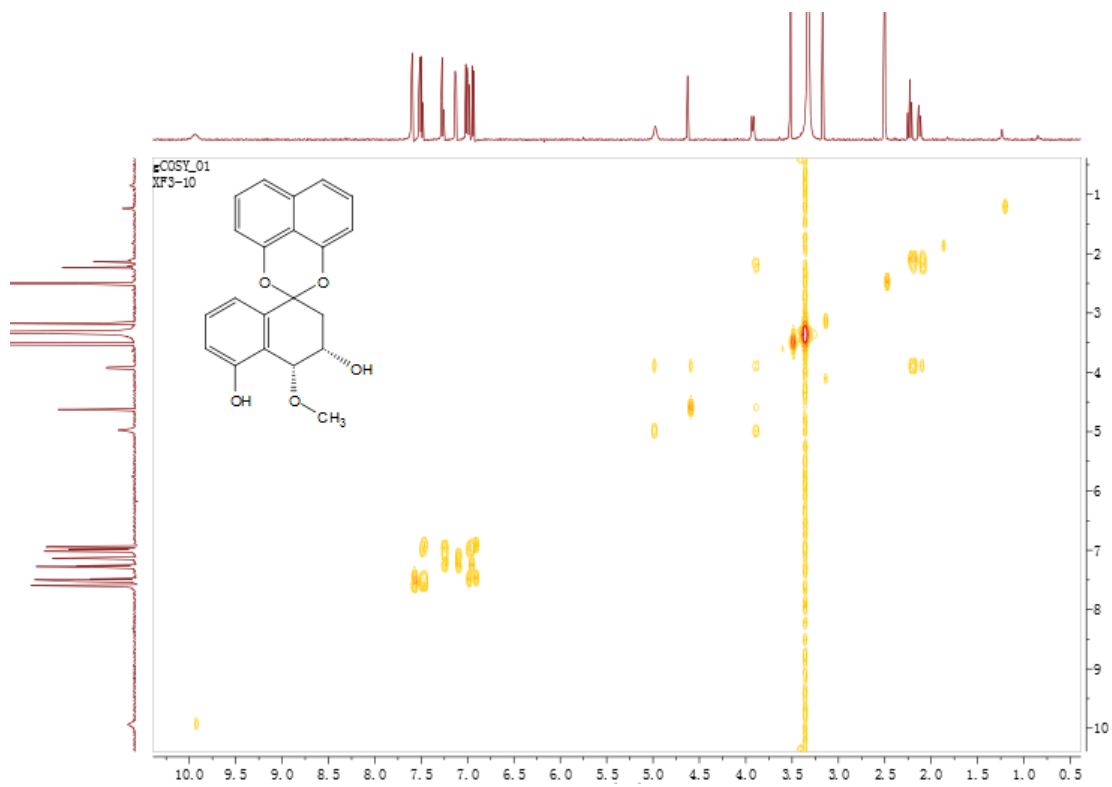

**Figure S15.** <sup>1</sup>H-<sup>1</sup>H COSY spectrum (600 MHz) of **2** in DMSO-*d*<sub>6</sub>.

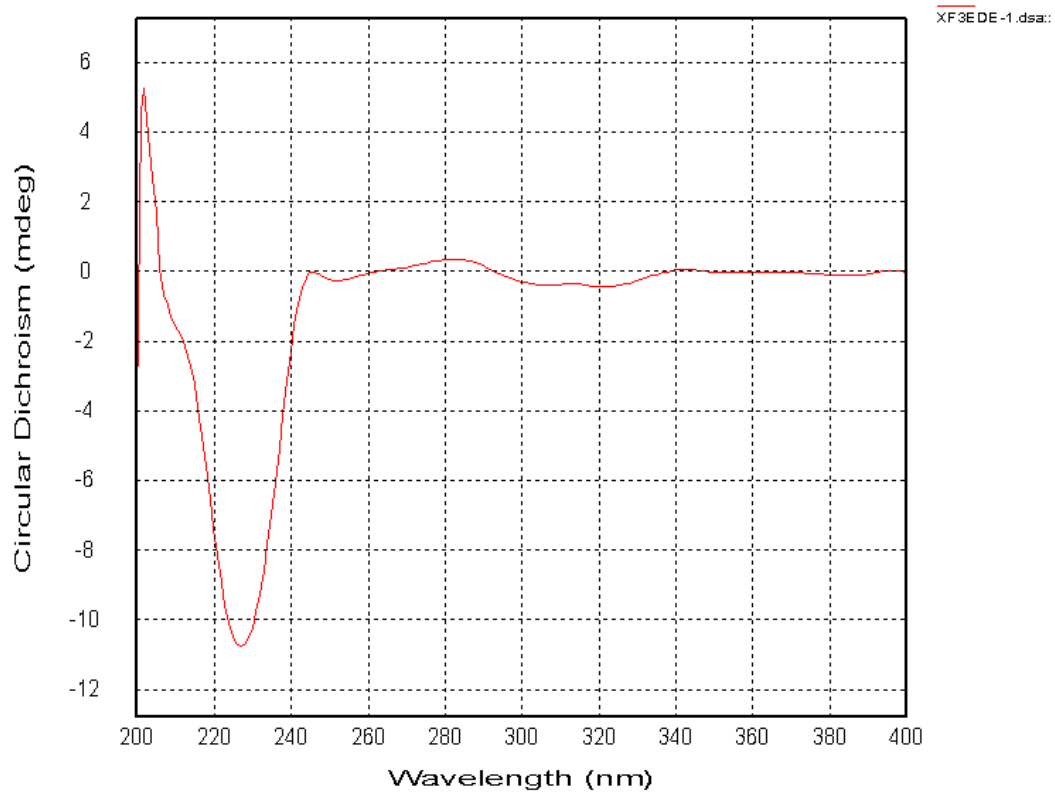

**Figure S16.** CD spectrum of **2**.

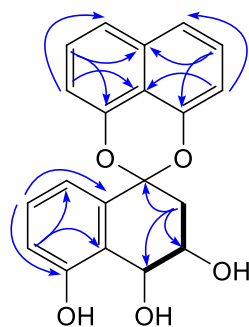

**Figure S17.** Key 1H–1H COSY (bold lines), HMBC (H→C) correlations for compound **3**.

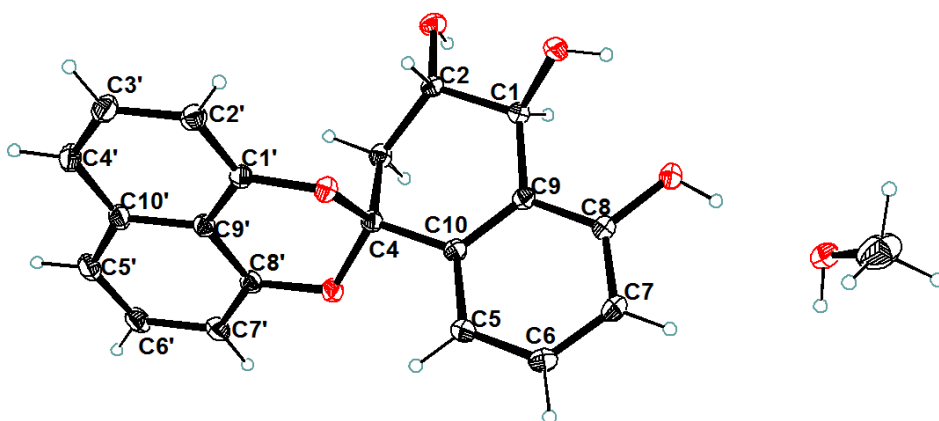

Figure S18. X-ray crystallographic structure of **3**.

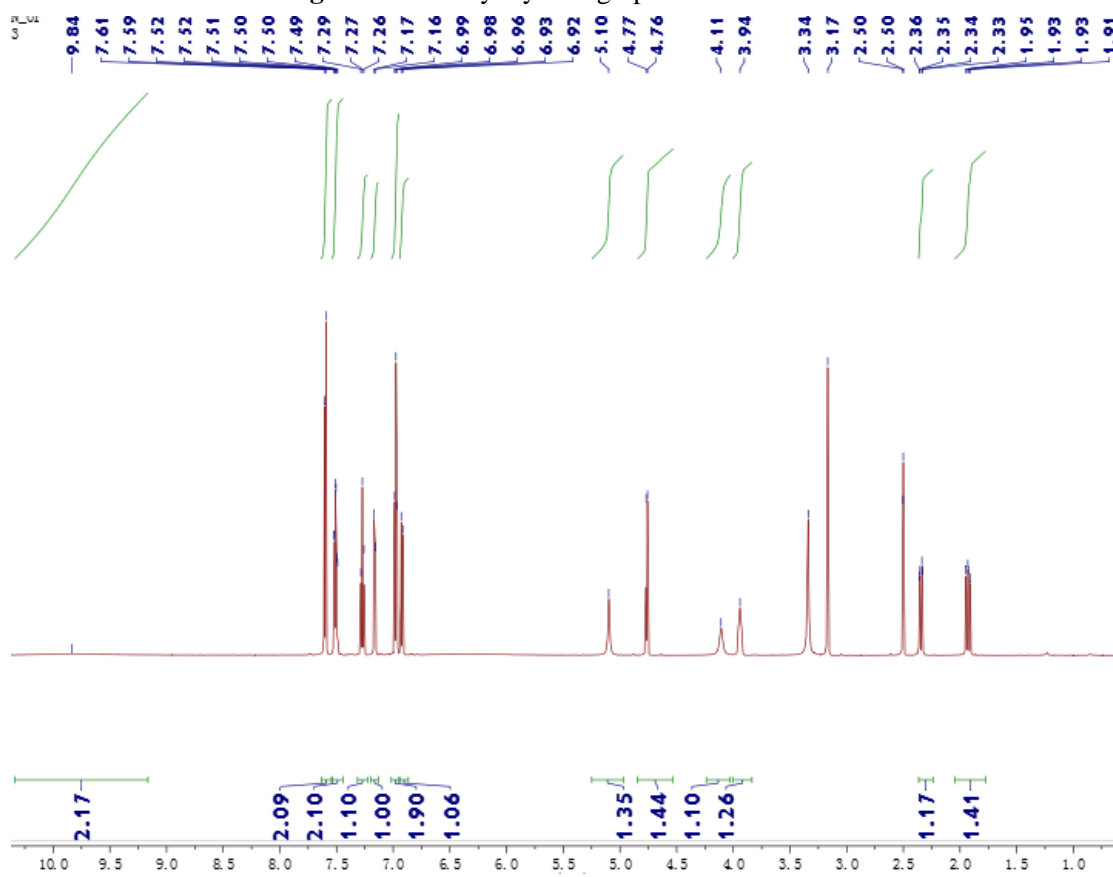

Figure S19.  $^1\text{H}$  NMR spectrum (600 MHz) of **3** in  $\text{DMSO-}d_6$ .

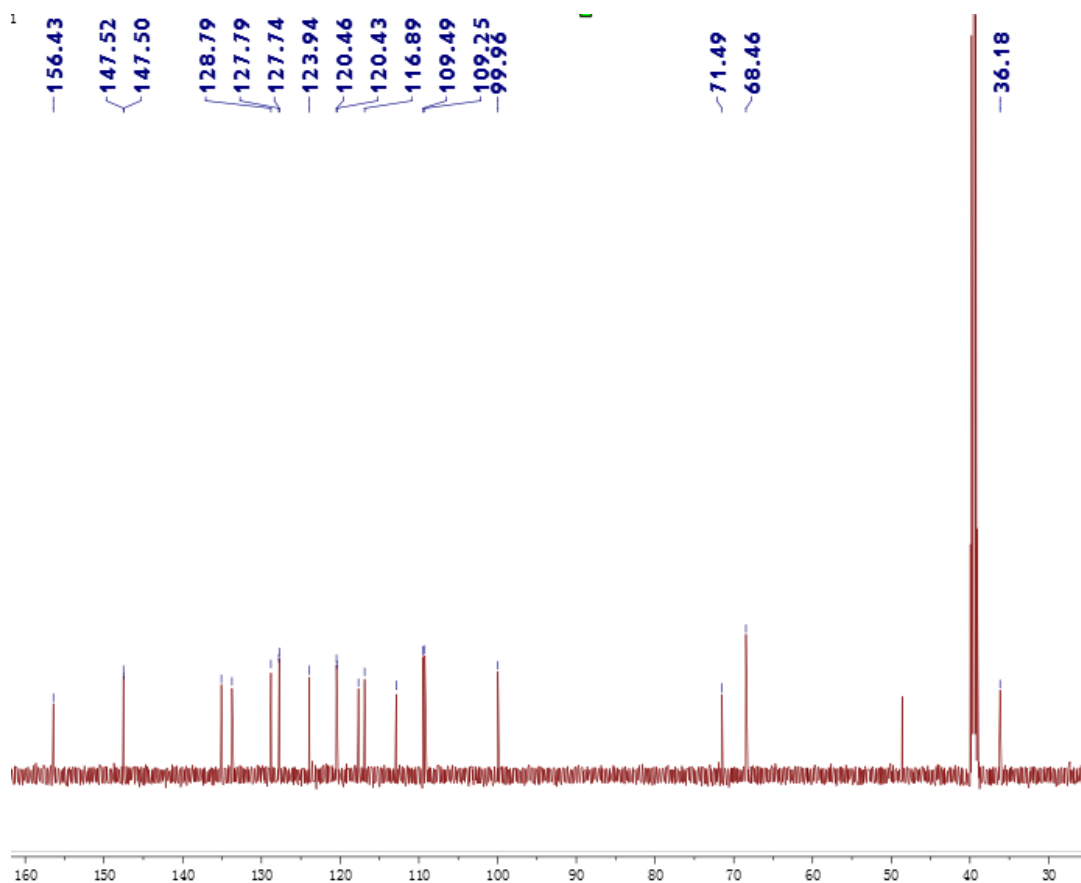

Figure S20.  $^{13}\text{C}$  NMR spectrum (150 MHz) of **3** in  $\text{DMSO-}d_6$ .

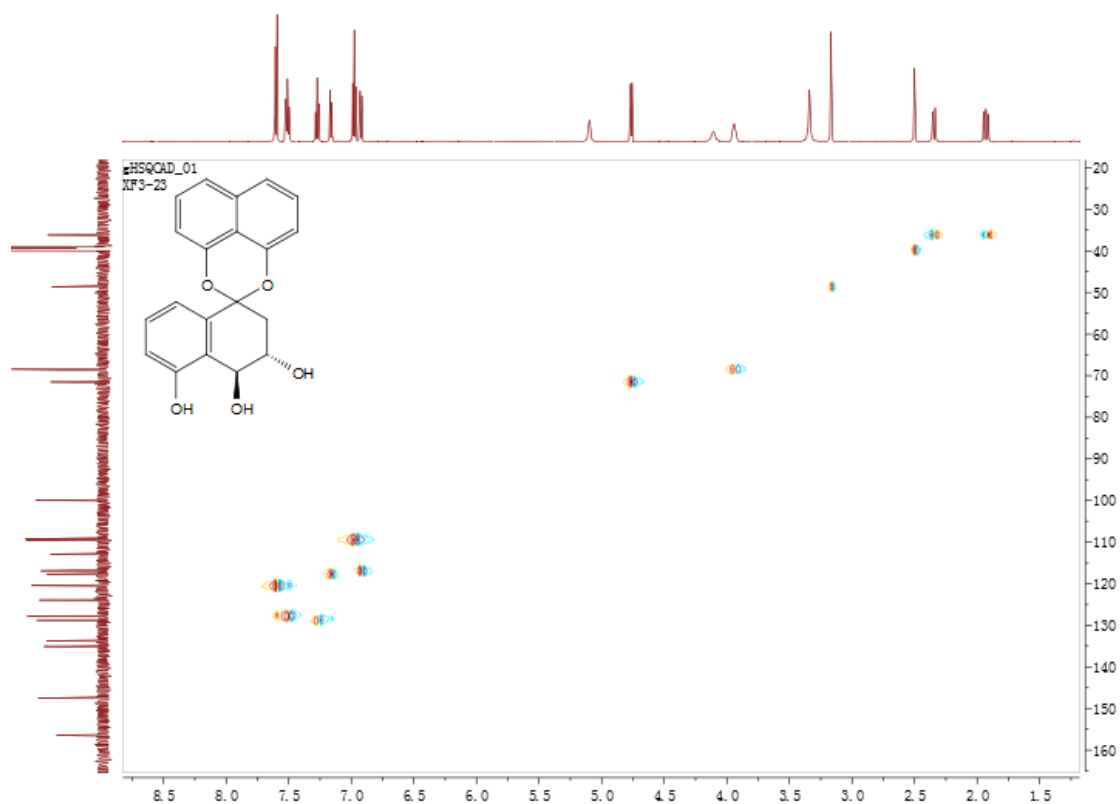

Figure S21. HSQC spectrum (600 MHz) of **3** in  $\text{DMSO-}d_6$ .

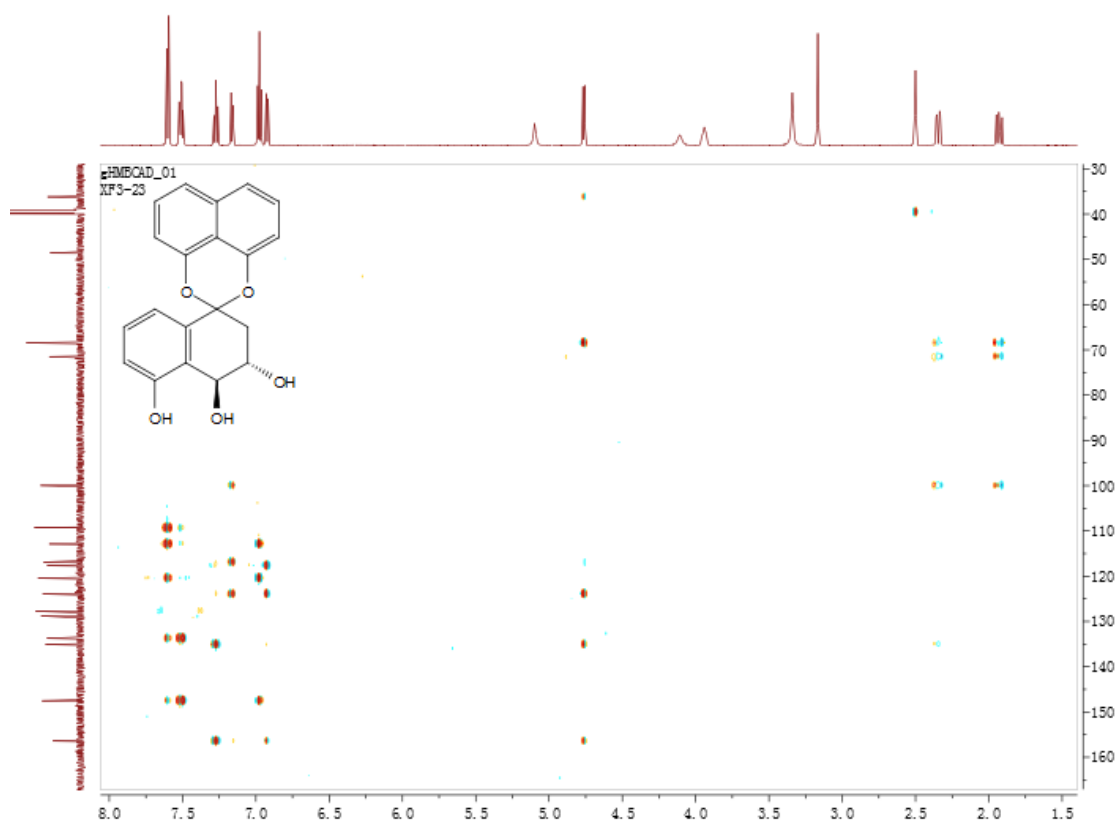

**Figure S22.** HMBC spectrum (600 MHz) of **3** in DMSO-*d*<sub>6</sub>.

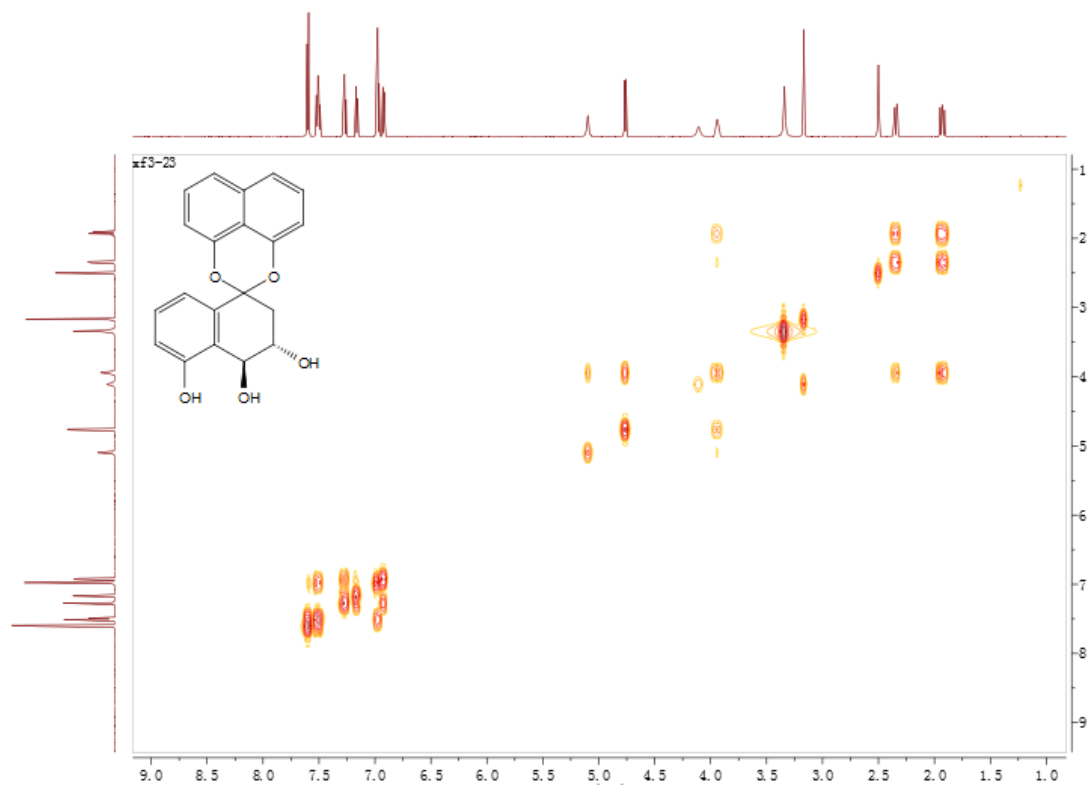

**Figure S23.** <sup>1</sup>H-<sup>1</sup>H COSY spectrum (600 MHz) of **3** in DMSO-*d*<sub>6</sub>.

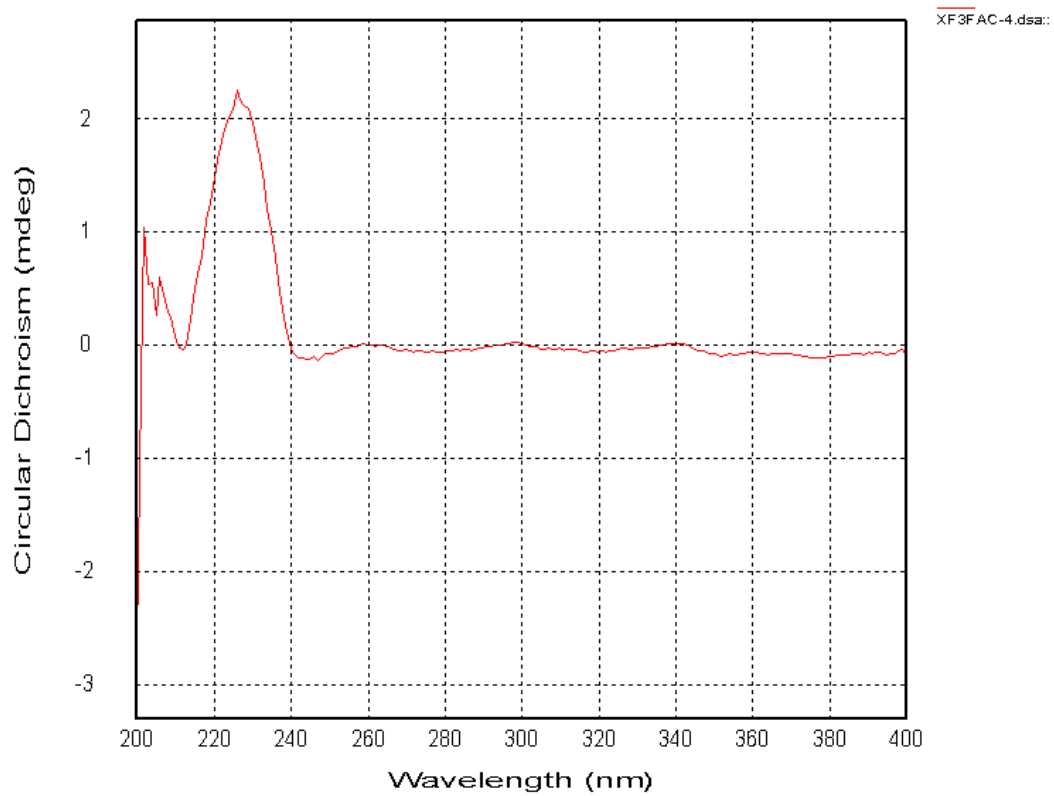

**Figure S24.** CD spectrum of **3**.

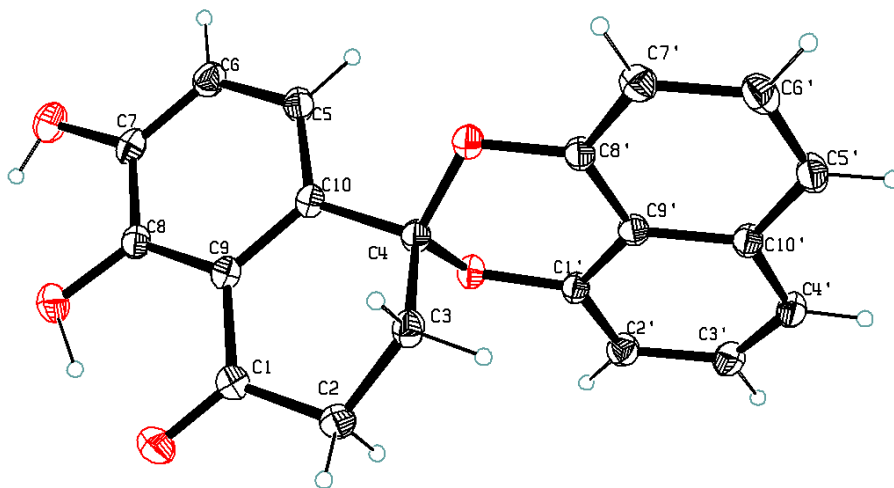

**Figure S25.** X-ray crystallographic structure of **4**.



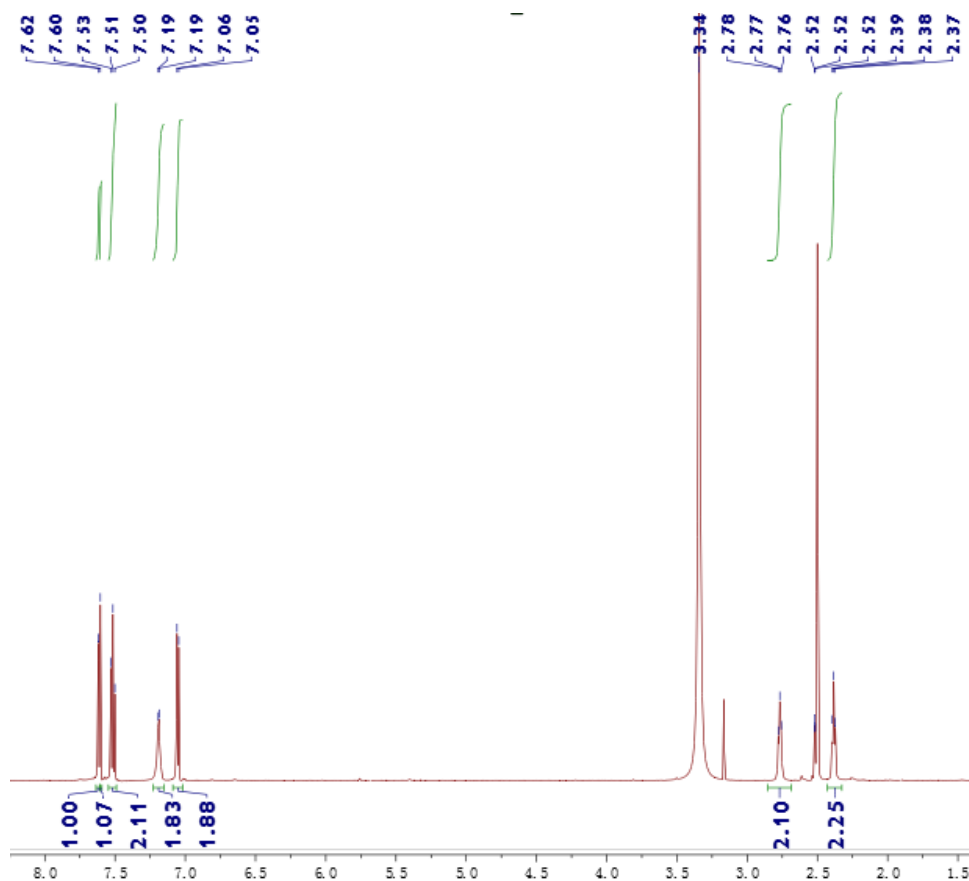

Figure S26.  $^1\text{H}$  NMR spectrum (600 MHz) of **4** in  $\text{DMSO-}d_6$ .

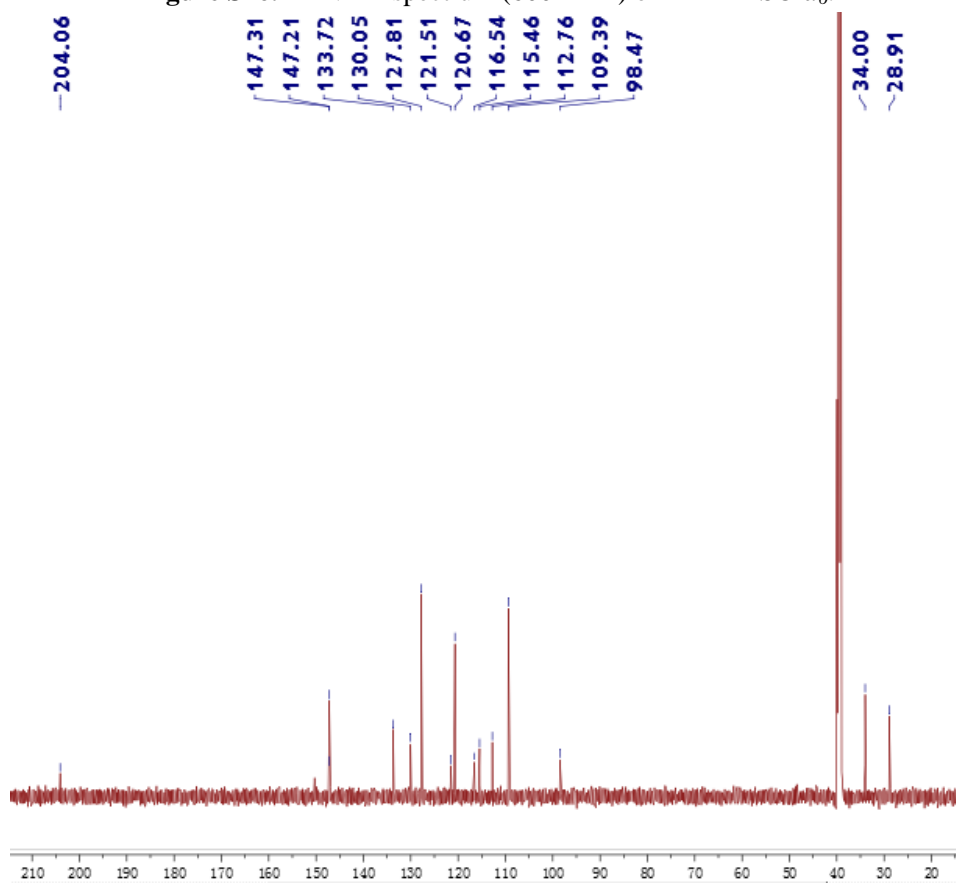

Figure S27.  $^{13}\text{C}$  NMR spectrum (150 MHz) of **4** in  $\text{DMSO-}d_6$ .

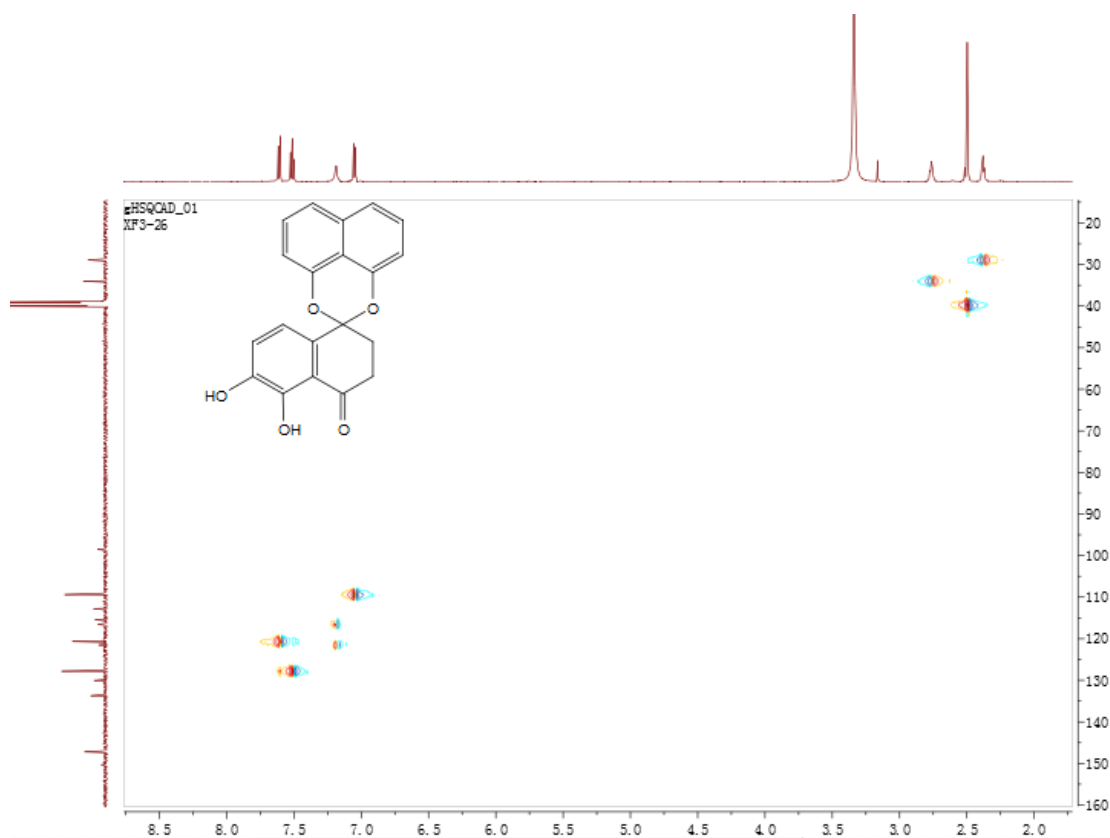

**Figure S28.** HSQC spectrum (600 MHz) of **4** in DMSO- $d_6$ .

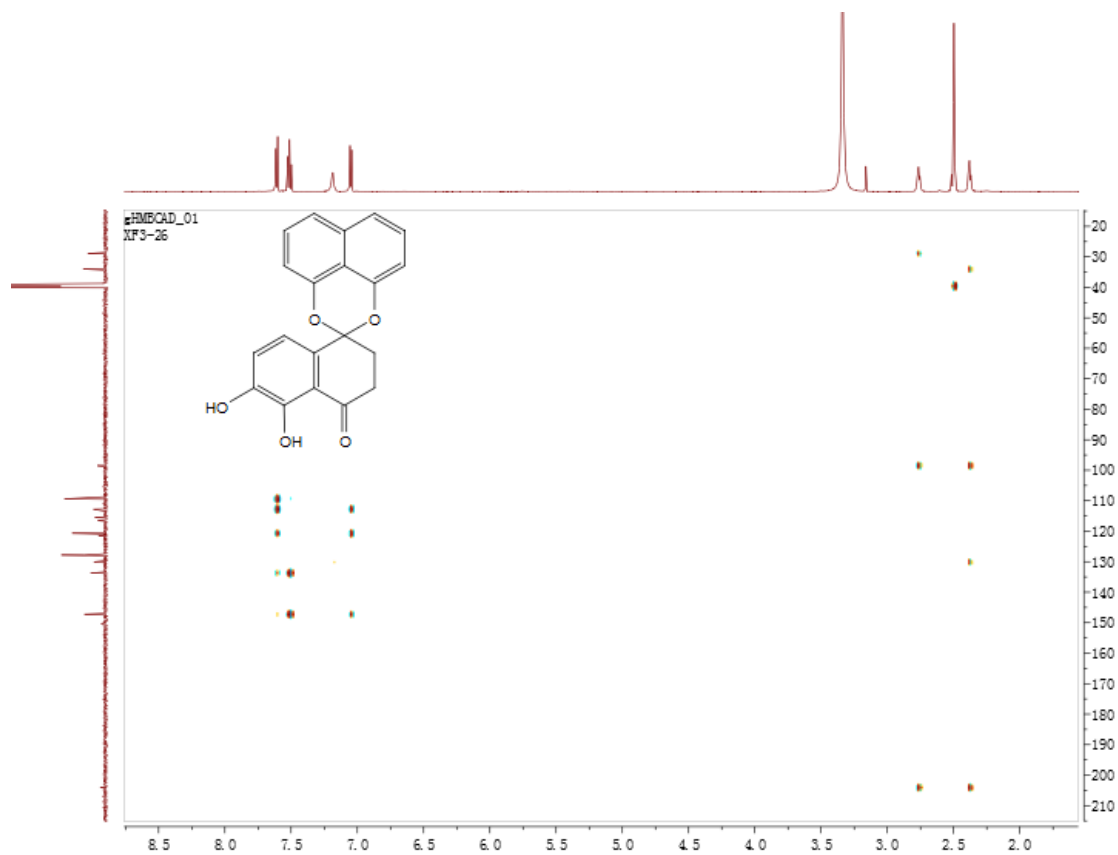

**Figure S29.** HMBC spectrum (600 MHz) of **4** in DMSO- $d_6$ .

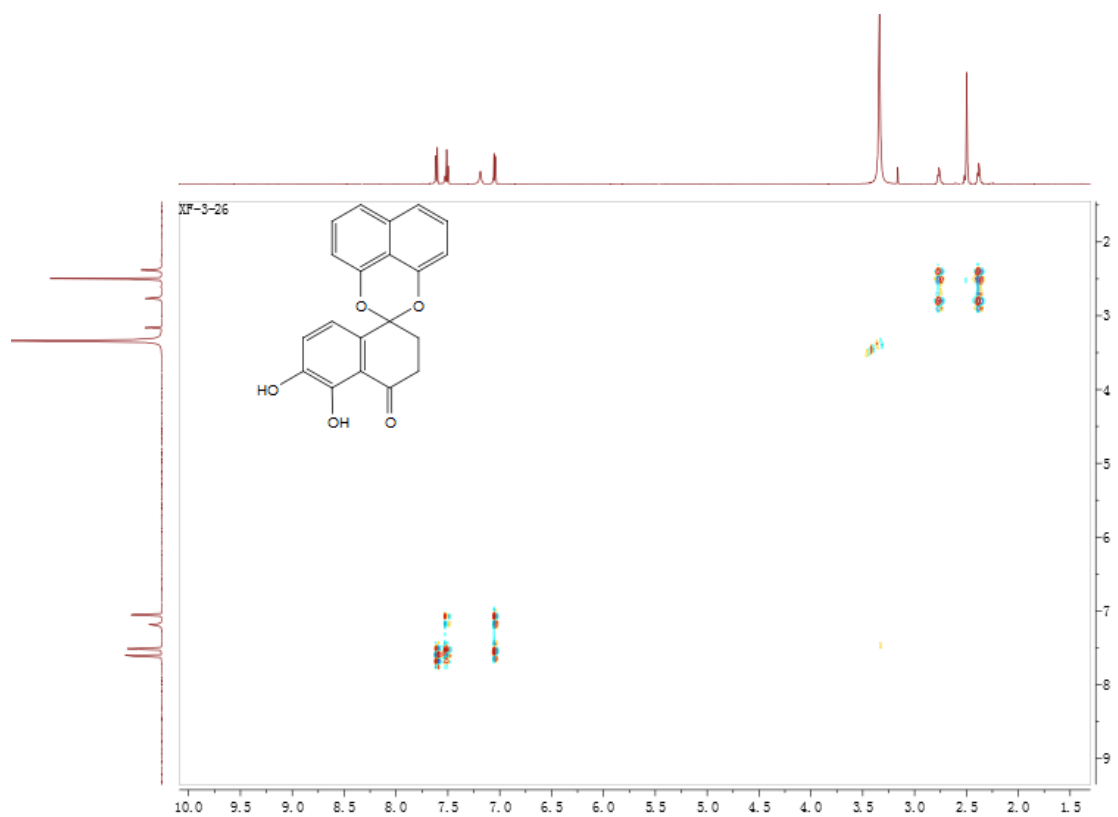

**Figure S30.**  $^1\text{H}$ - $^1\text{H}$  COSY spectrum (600 MHz) of **4** in  $\text{DMSO-}d_6$ .

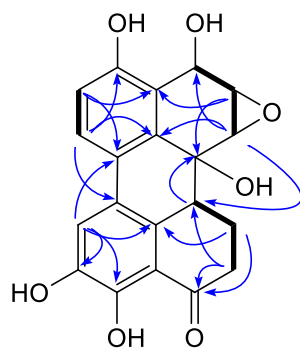

**Figure S31.** Key  $^1\text{H}$ - $^1\text{H}$  COSY (bold lines), HMBC ( $\text{H}\rightarrow\text{C}$ ) correlations for compound **7**.

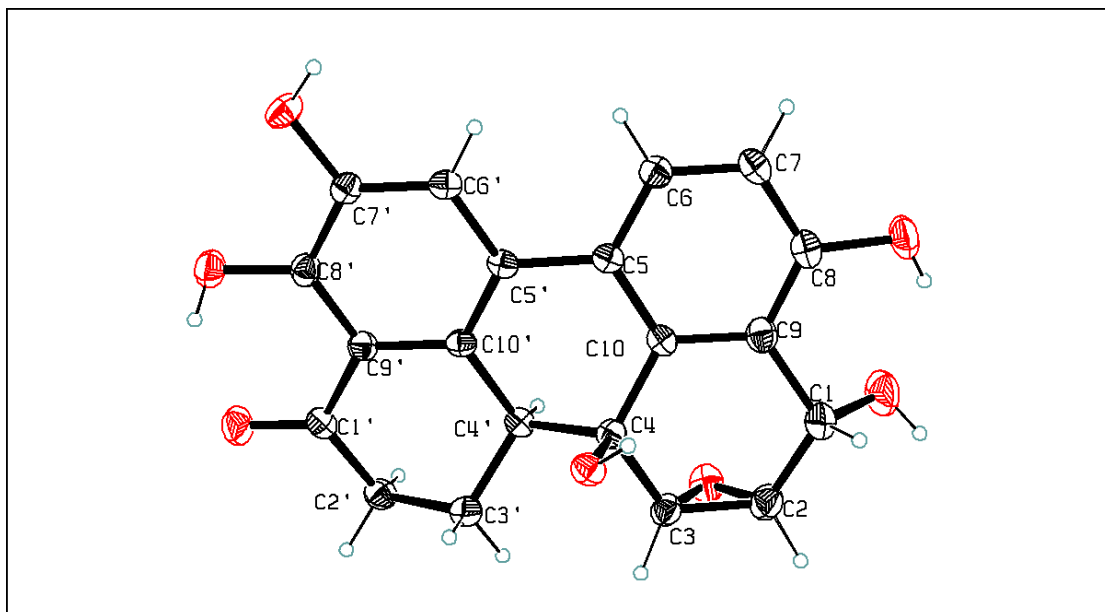

Figure S32. X-ray crystallographic structure of 7.

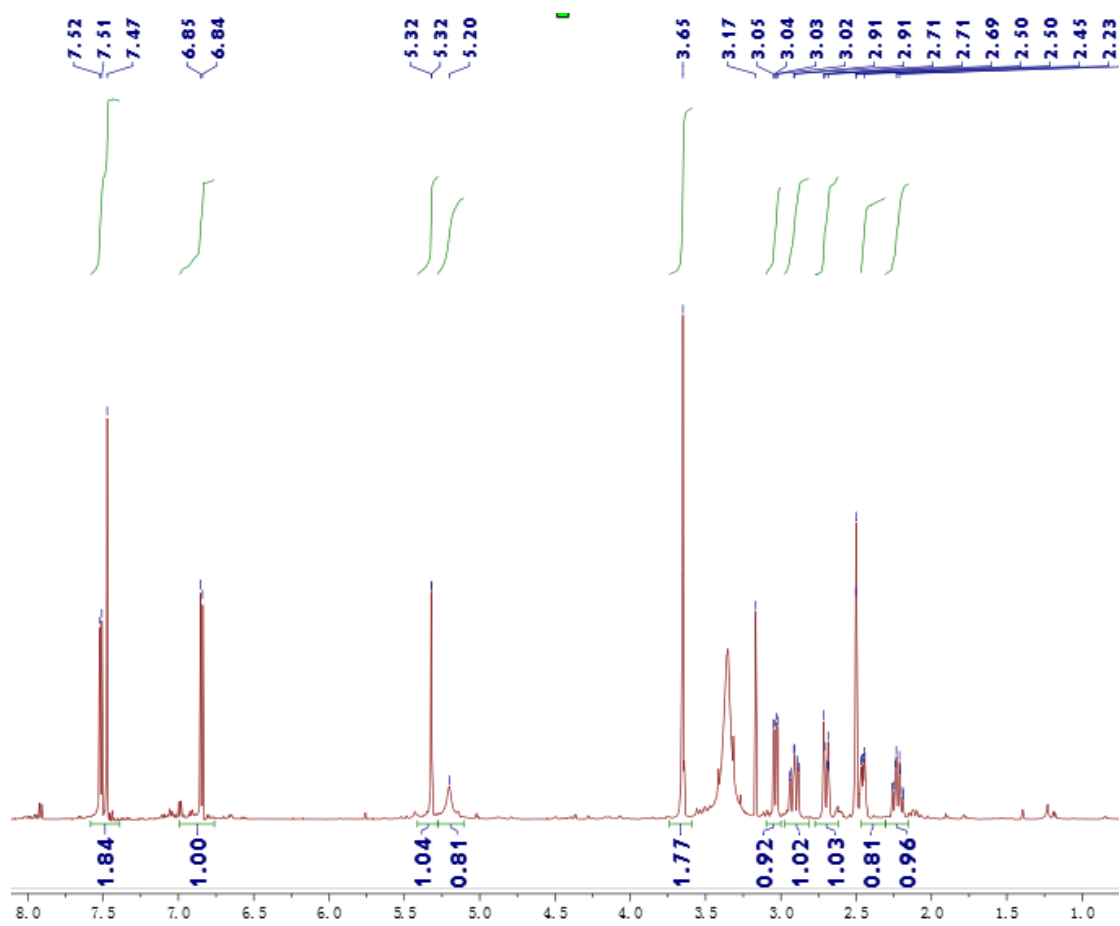

Figure S33.  $^1\text{H}$  NMR spectrum (600 MHz) of 7 in  $\text{DMSO-}d_6$ .

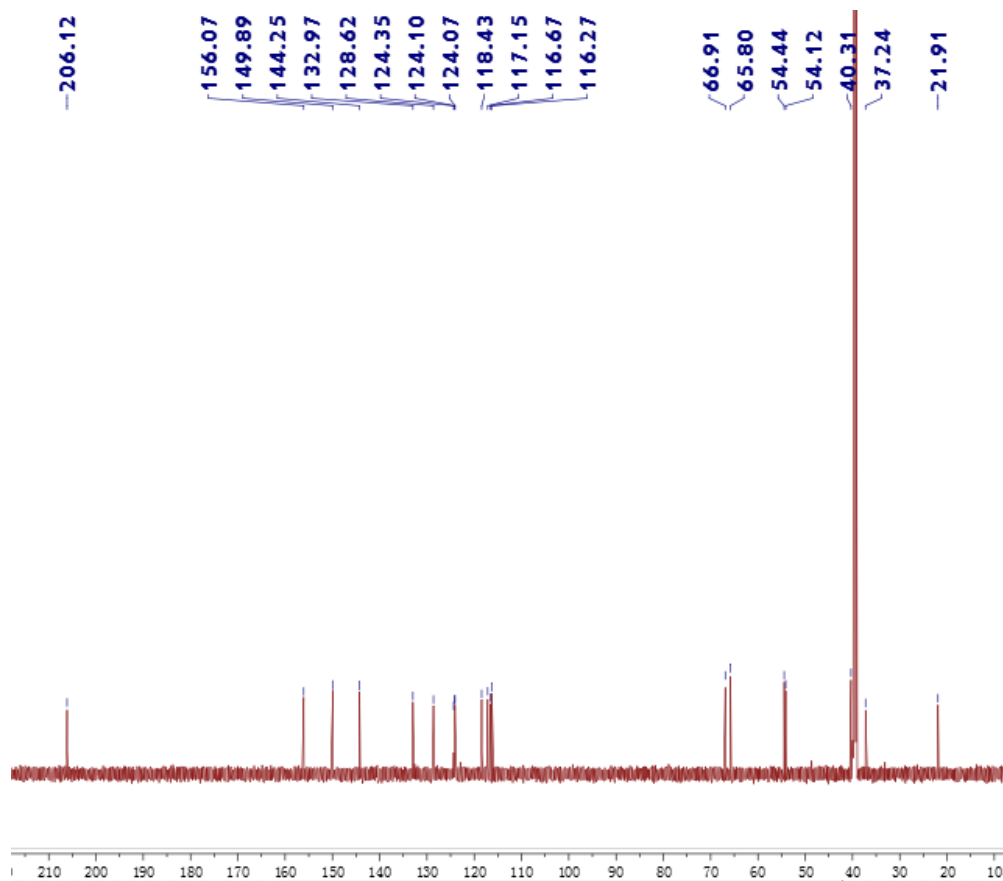

Figure S34.  $^{13}\text{C}$  NMR spectrum (150 MHz) of **7** in  $\text{DMSO-}d_6$ .

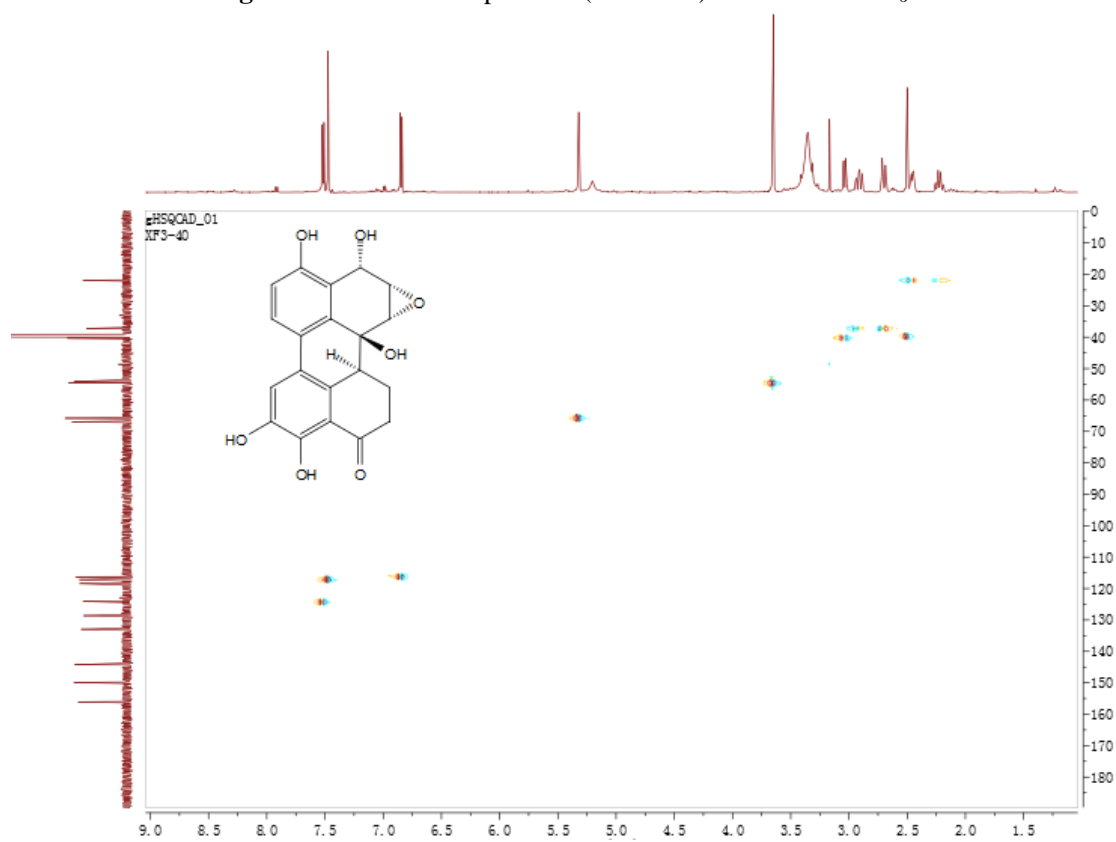

Figure S35. HSQC spectrum (600 MHz) of **7** in  $\text{DMSO-}d_6$ .

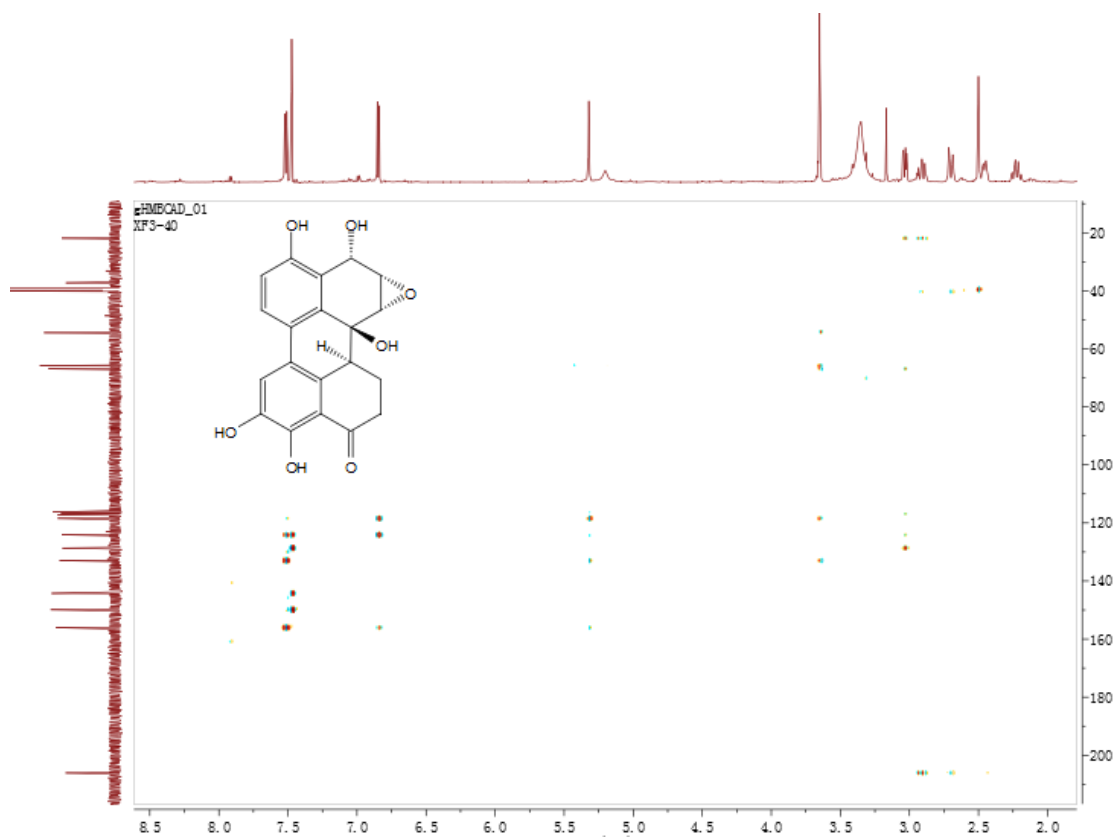

**Figure S36.** HMBC spectrum (600 MHz) of **7** in DMSO- $d_6$ .

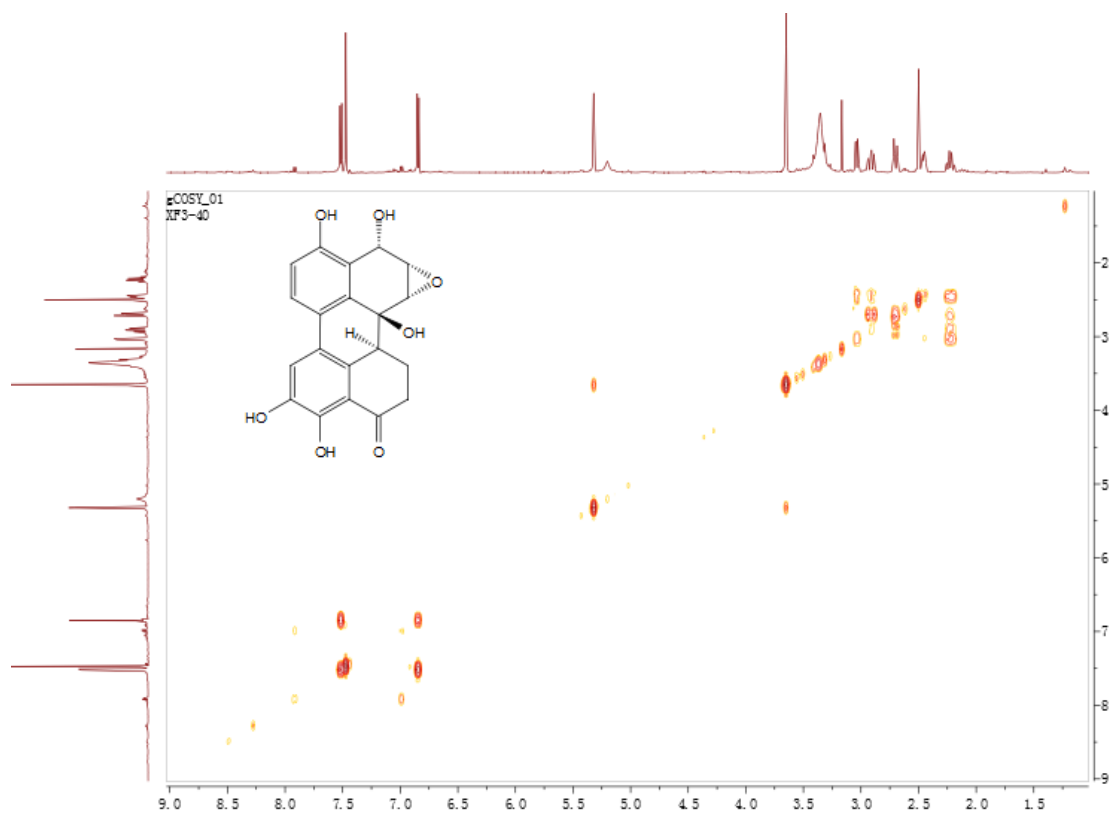

**Figure S37.**  $^1\text{H}$ - $^1\text{H}$  COSY spectrum (600 MHz) of **7** in DMSO- $d_6$ .

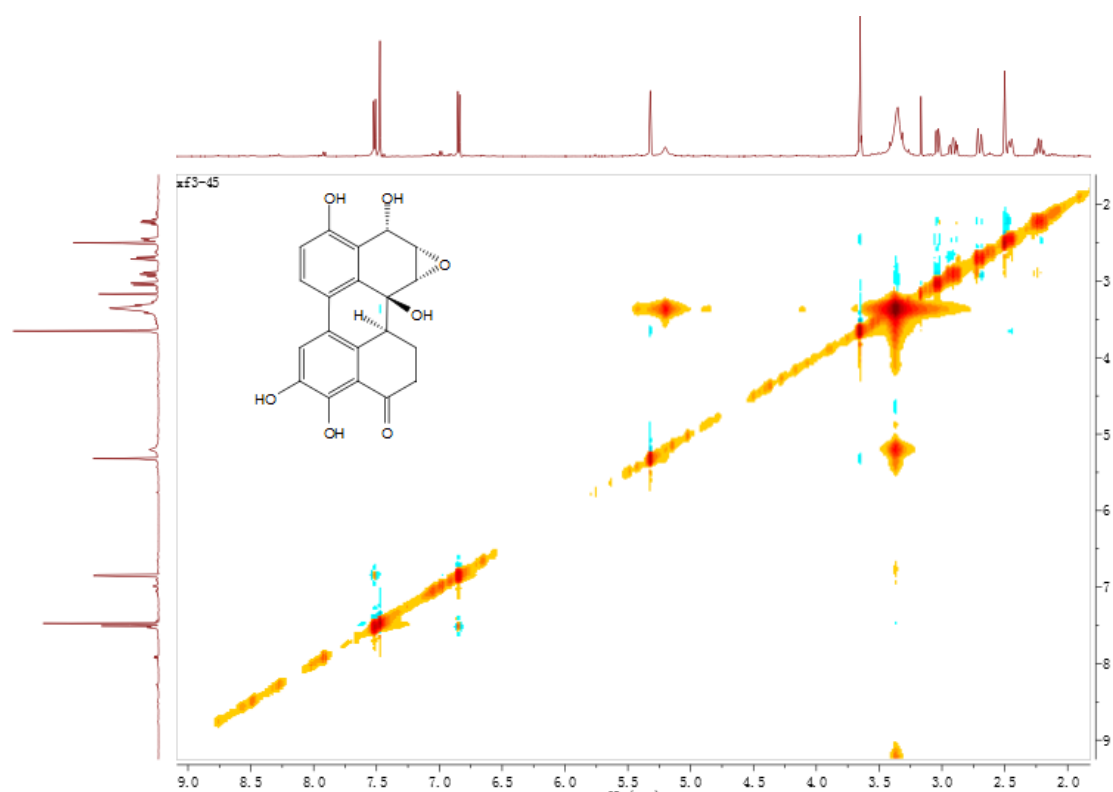

**Figure S38.** NOESY spectrum (600 MHz) of **7** in DMSO- $d_6$ .

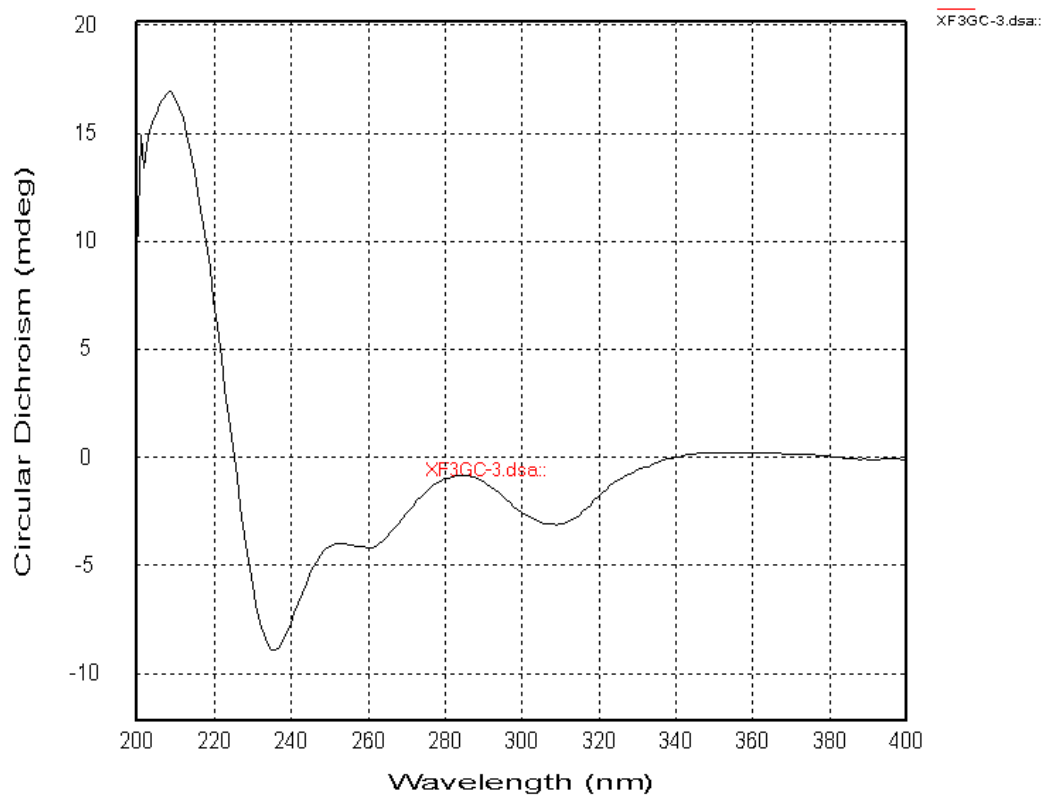

**Figure S39.** CD spectrum of **7**.

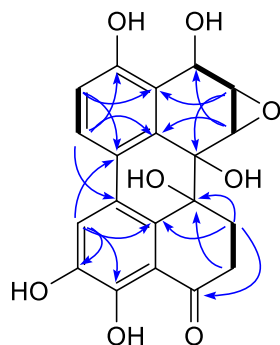

**Figure S40.** Key  $^1\text{H}$ - $^1\text{H}$  COSY (bold lines), HMBC (H $\rightarrow$ C) correlations for compound **8**.

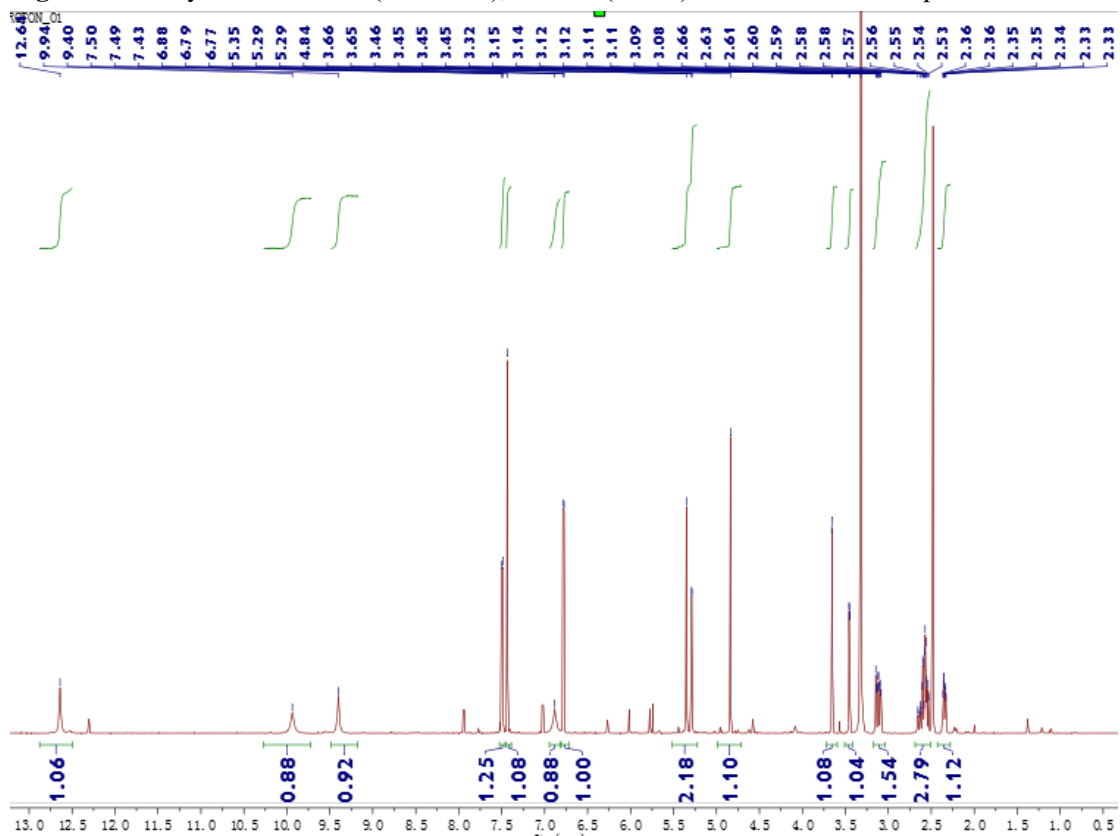

**Figure S41.**  $^1\text{H}$  NMR spectrum (600 MHz) of **8** in  $\text{DMSO-}d_6$ .



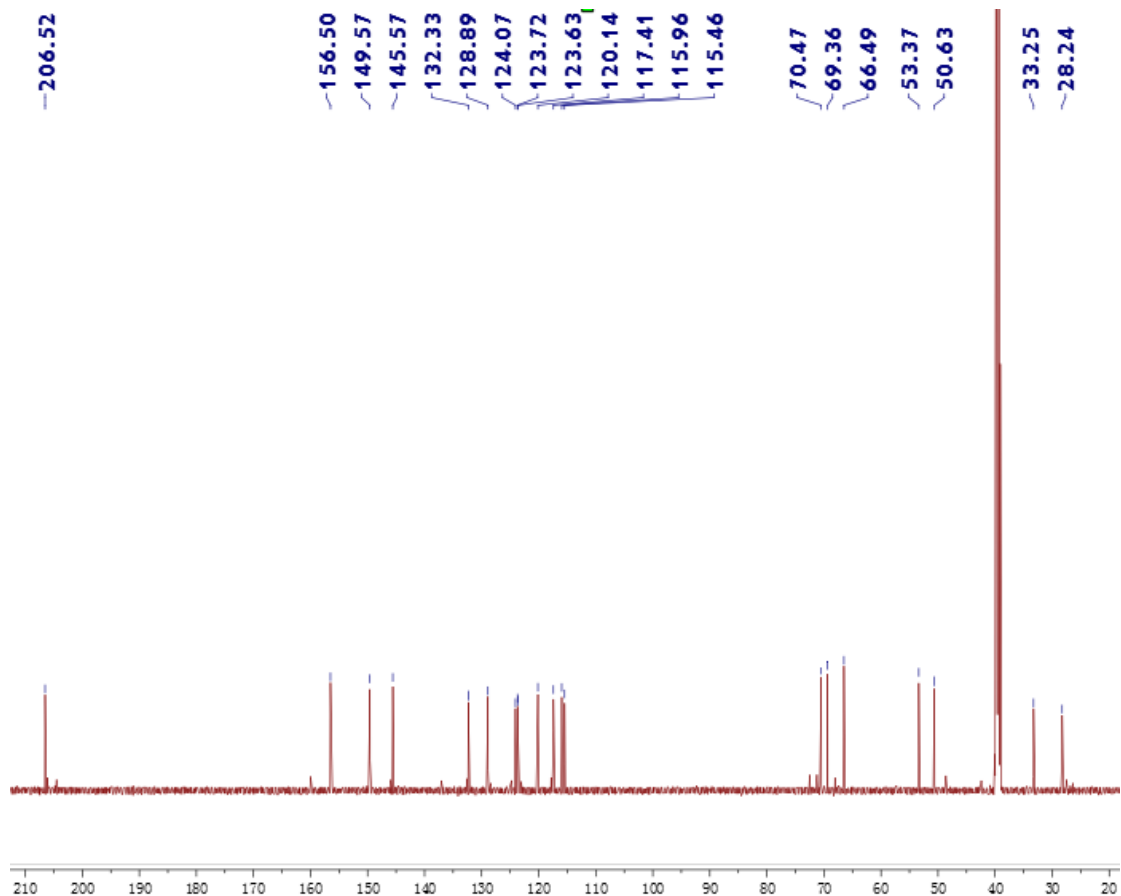

Figure S42.  $^{13}\text{C}$  NMR spectrum (150 MHz) of **8** in  $\text{DMSO-}d_6$ .

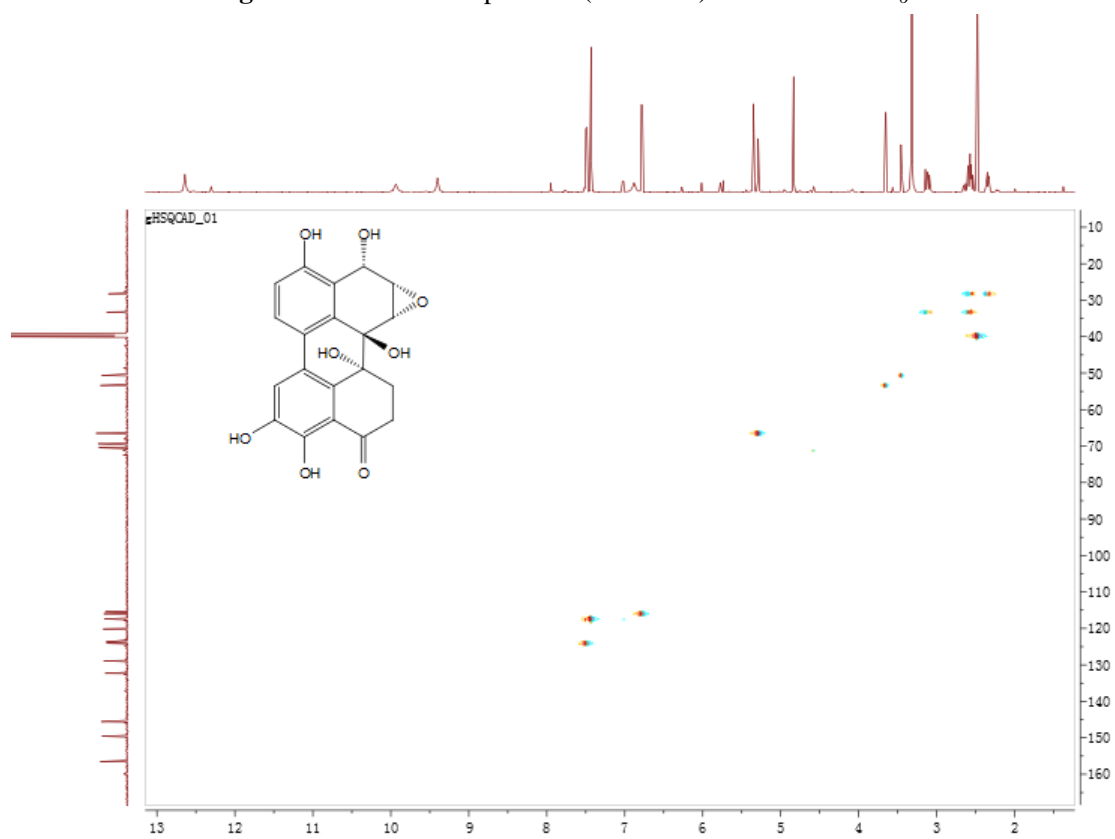

Figure S43. HSQC spectrum (600 MHz) of **8** in  $\text{DMSO-}d_6$ .

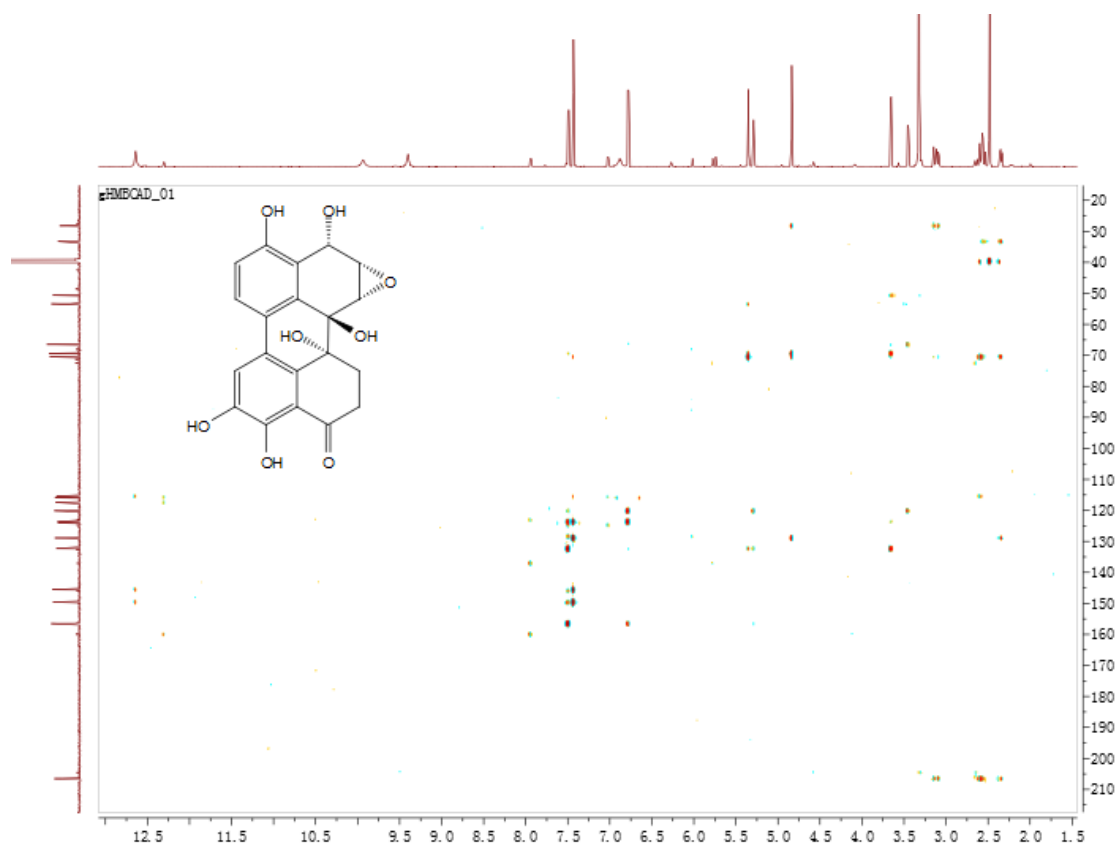

**Figure S44.** HMBC spectrum (600 MHz) of **8** in  $\text{DMSO-}d_6$ .

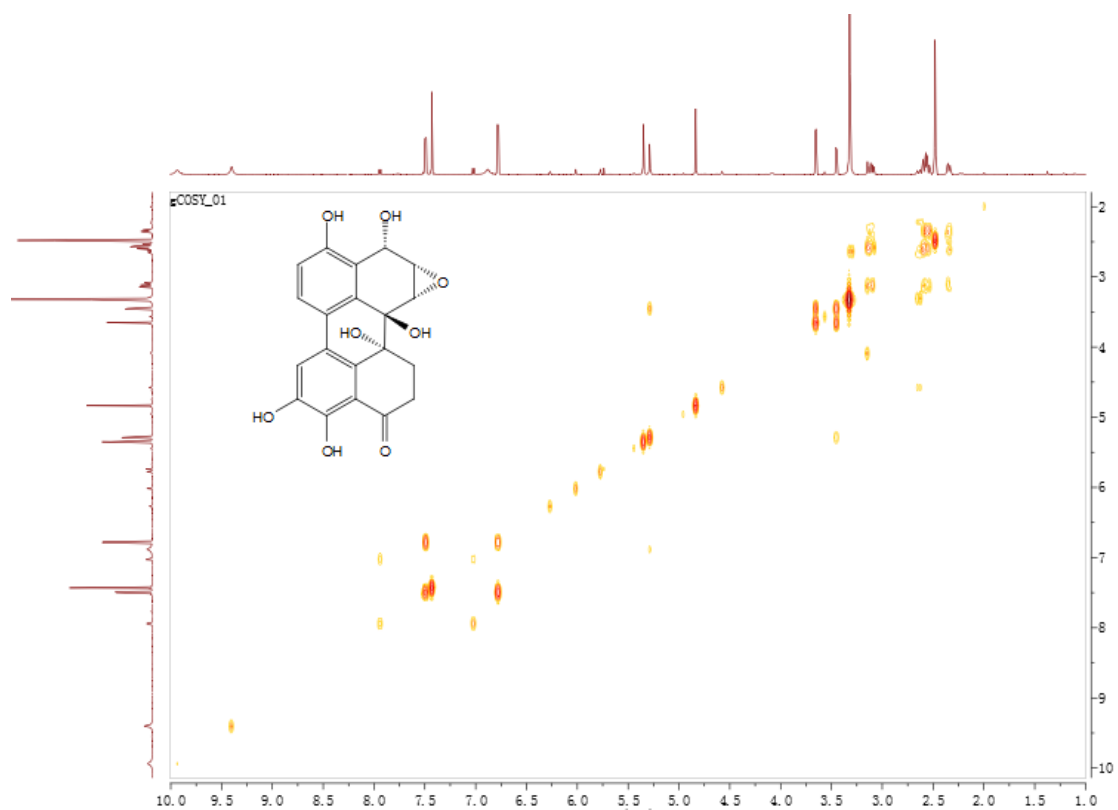

**Figure S45.**  $^1\text{H}$ - $^1\text{H}$  COSY spectrum (600 MHz) of **8** in  $\text{DMSO-}d_6$ .

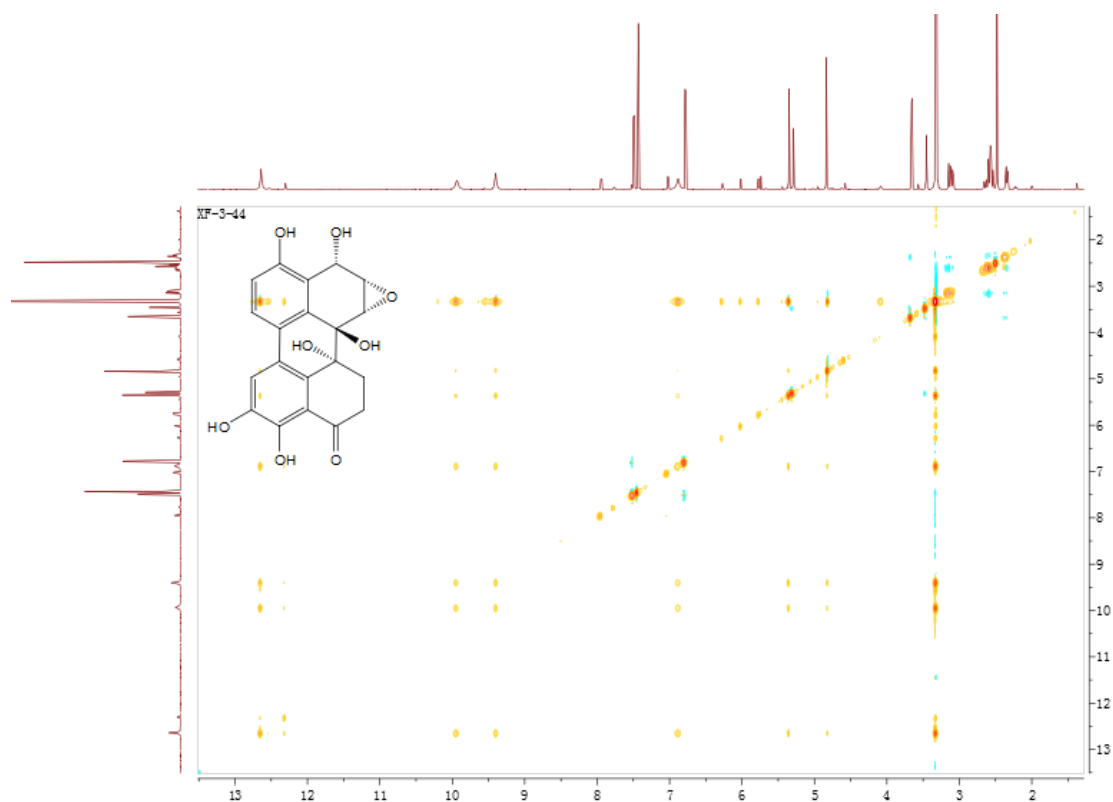

**Figure S46.** NOESY spectrum (600 MHz) of **8** in DMSO-*d*<sub>6</sub>.

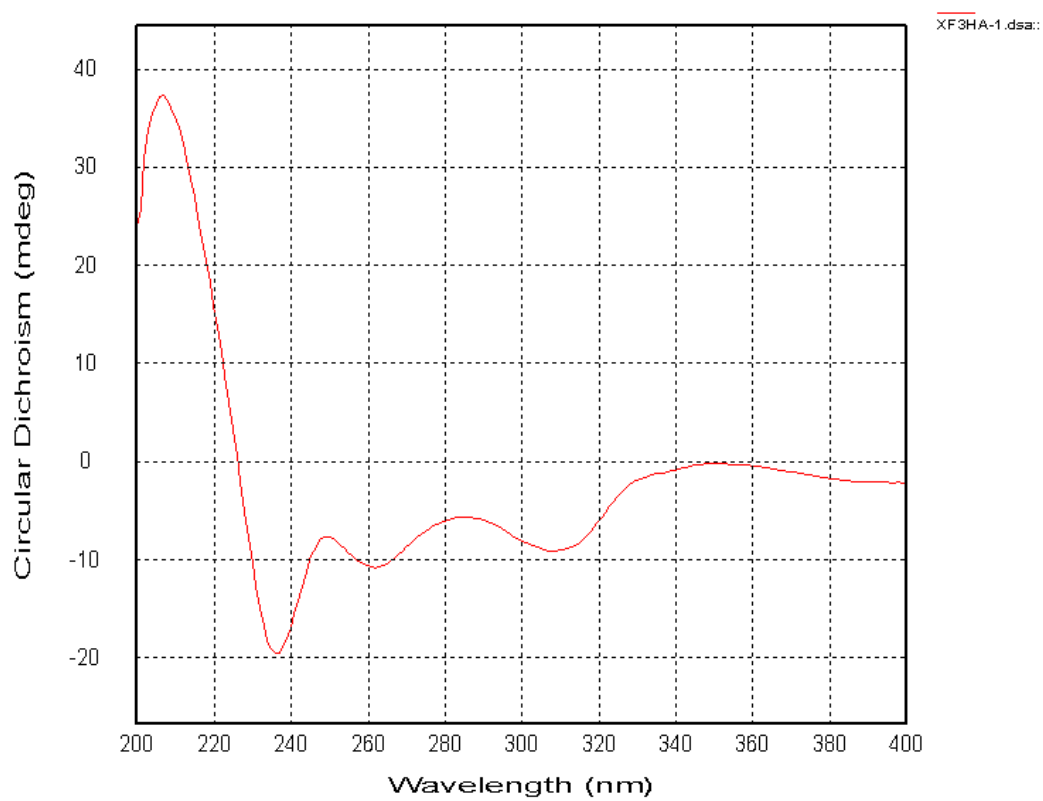

**Figure S47.** CD spectrum of **8**.

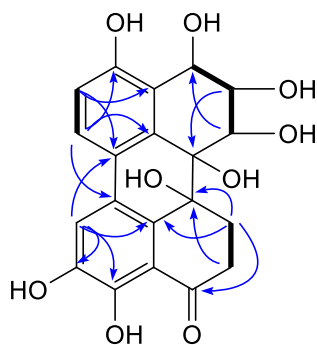

**Figure S48.** Key  $^1\text{H}$ - $^1\text{H}$  COSY (bold lines), HMBC (H $\rightarrow$ C) correlations for compound **9**.

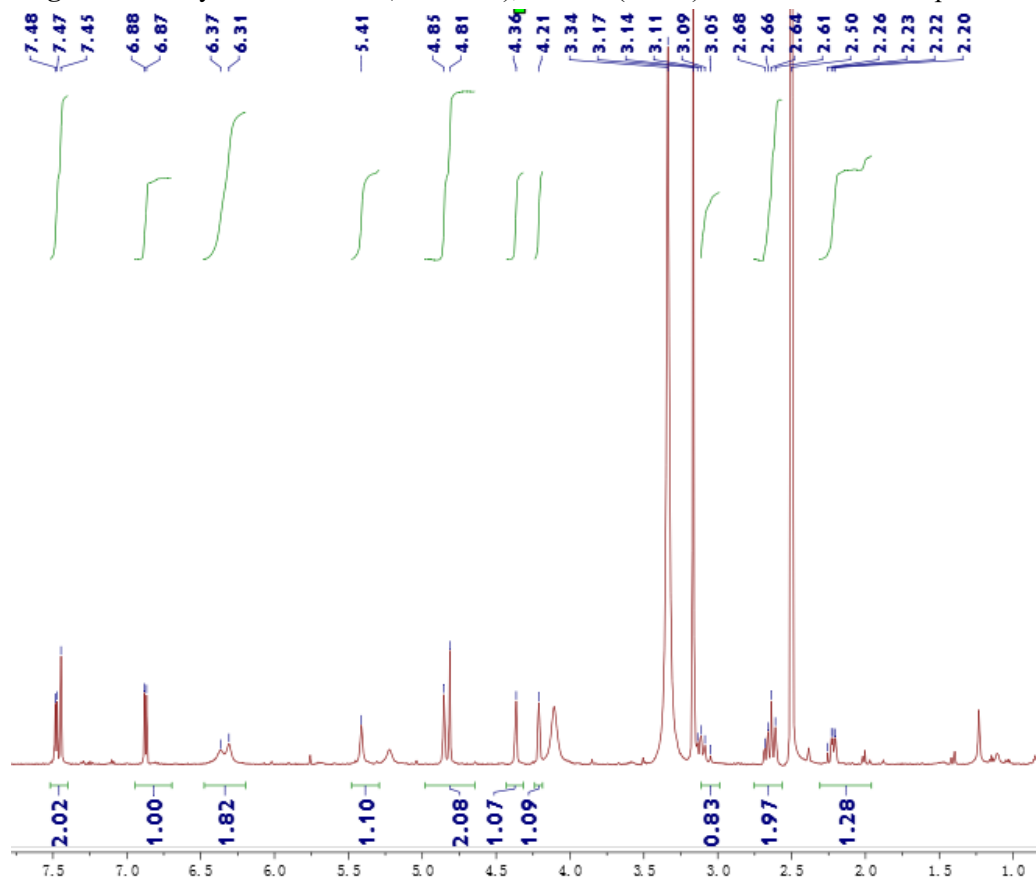

**Figure S49.**  $^1\text{H}$  NMR spectrum (600 MHz) of **9** in  $\text{DMSO-}d_6$ .

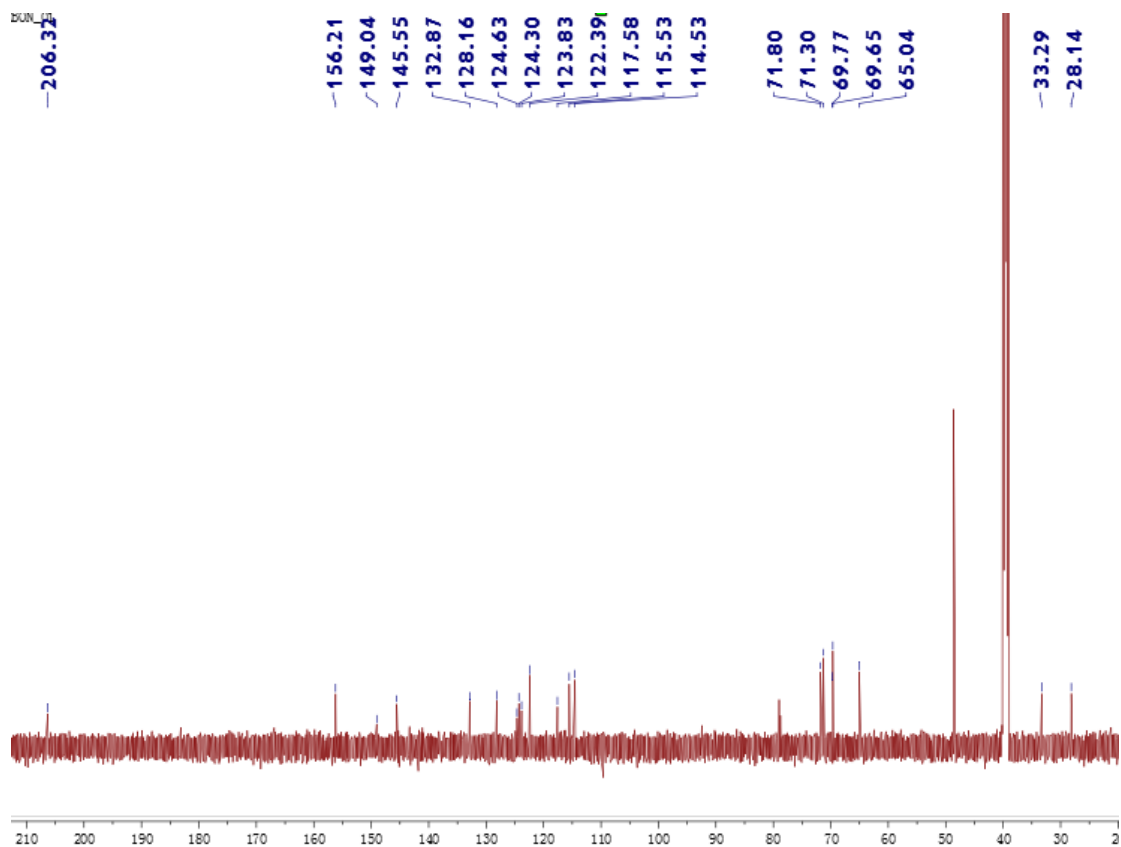

Figure S50.  $^{13}\text{C}$  NMR spectrum (150 MHz) of **9** in  $\text{DMSO-}d_6$ .

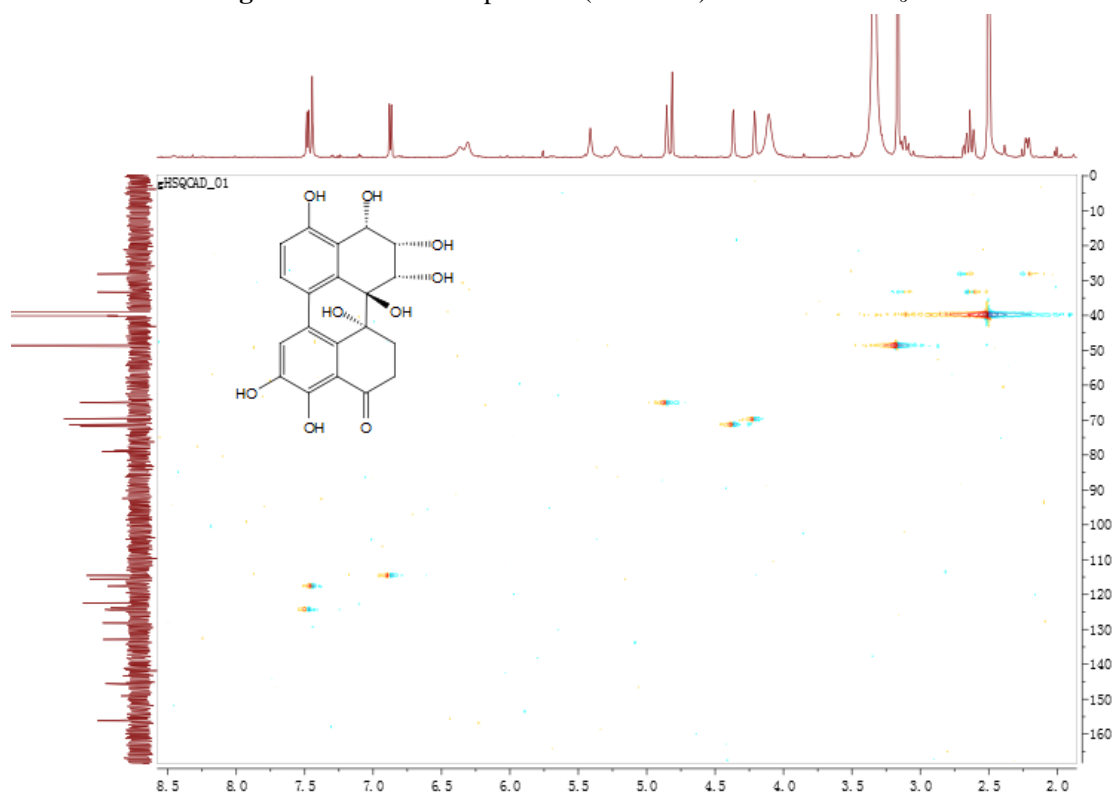

Figure S51. HSQC spectrum (600 MHz) of **9** in  $\text{DMSO-}d_6$ .

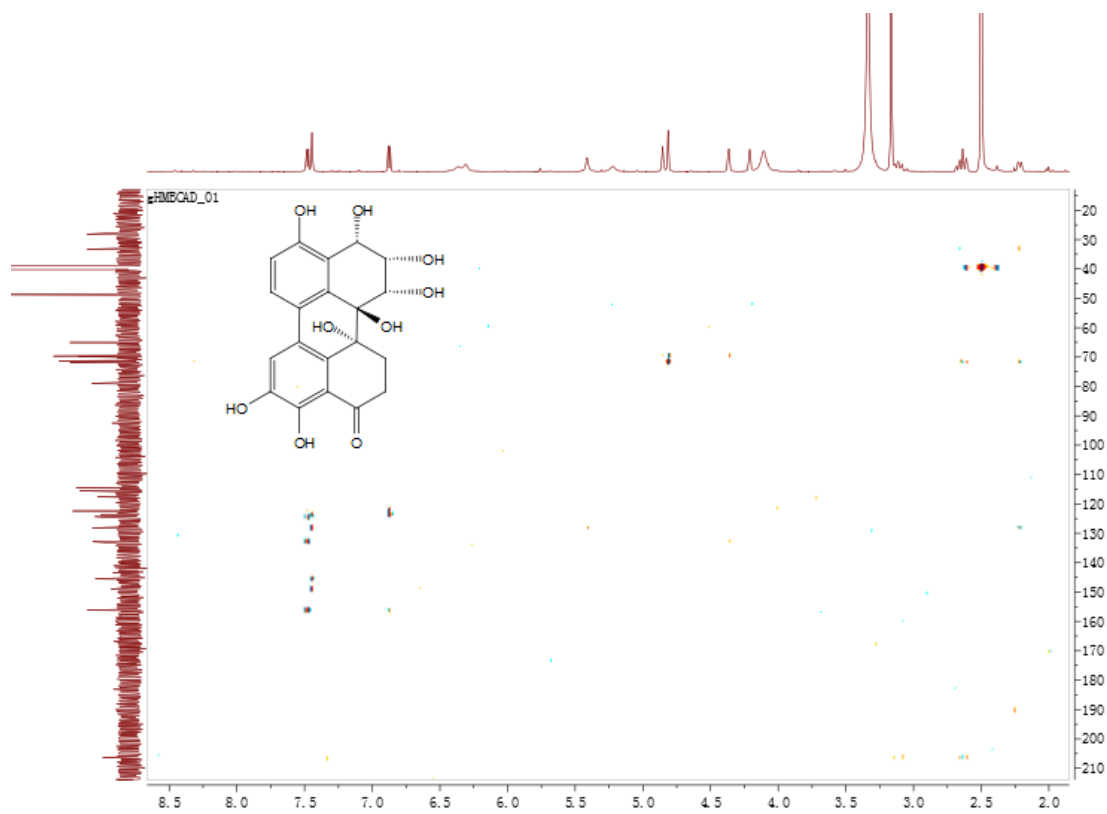

**Figure S52.** HMBC spectrum (600 MHz) of **9** in DMSO-*d*<sub>6</sub>.

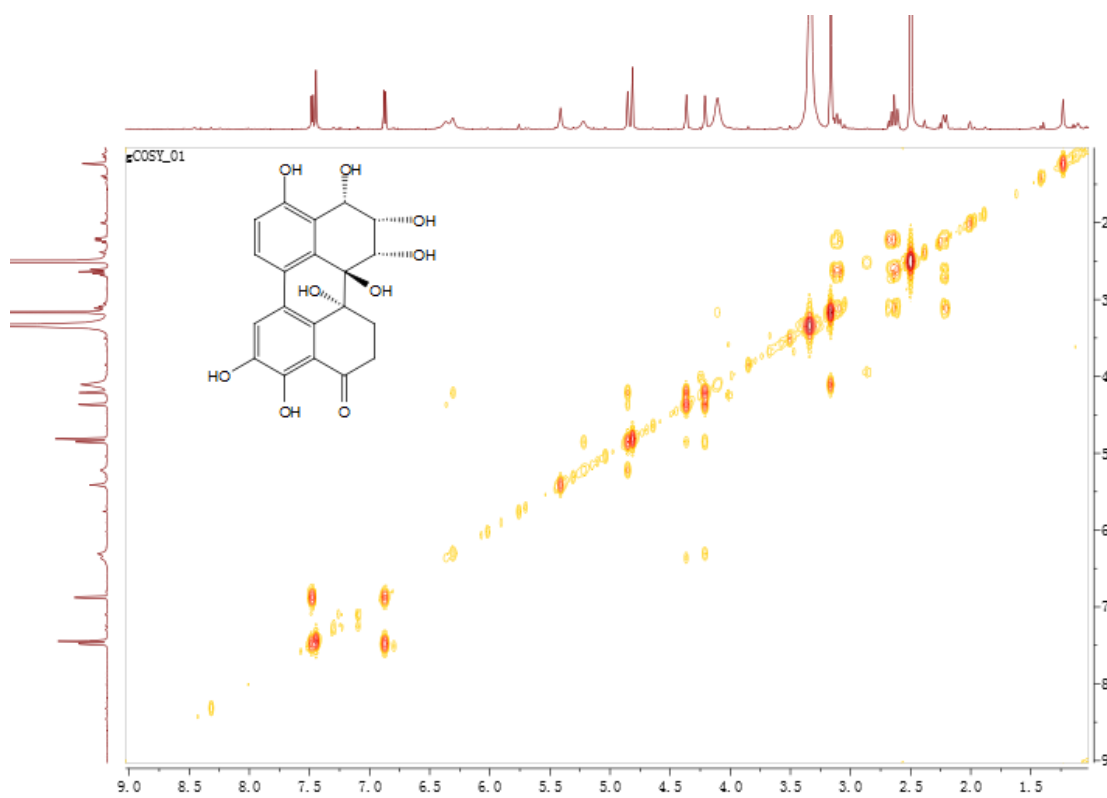

**Figure S53.** <sup>1</sup>H-<sup>1</sup>H COSY spectrum (600 MHz) of **9** in DMSO-*d*<sub>6</sub>.

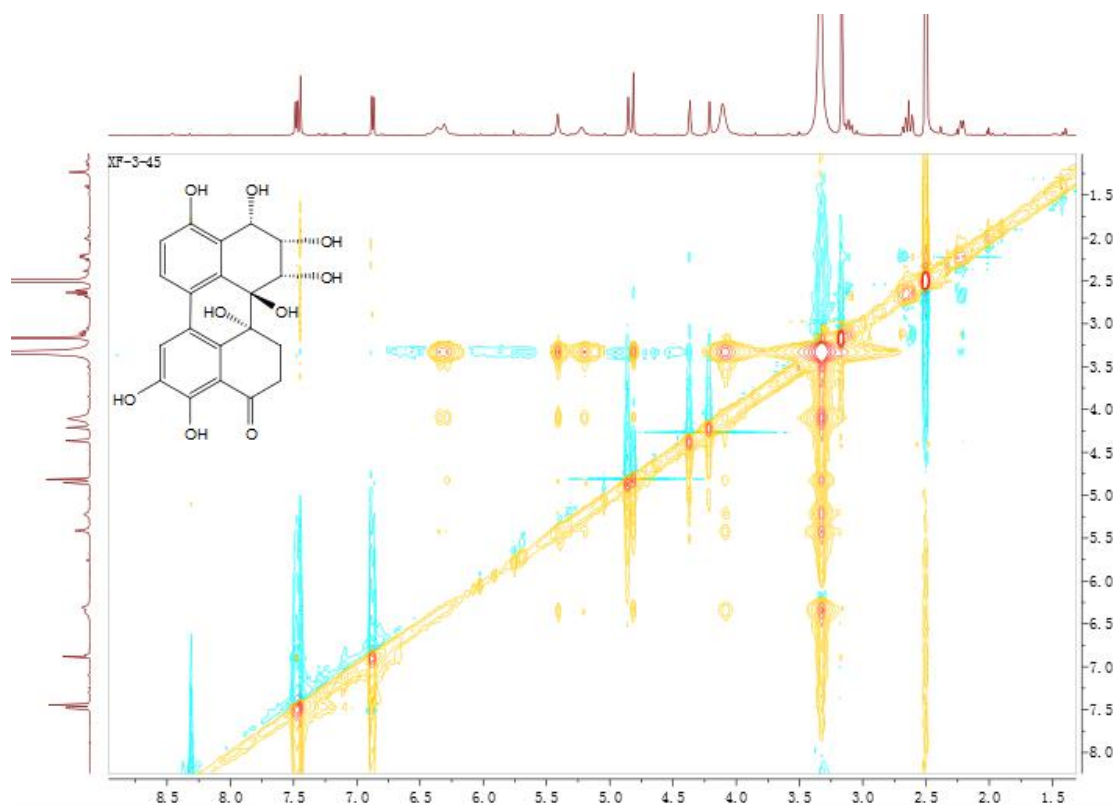

**Figure S54.** NOESY spectrum (600 MHz) of **9** in DMSO-*d*<sub>6</sub>.

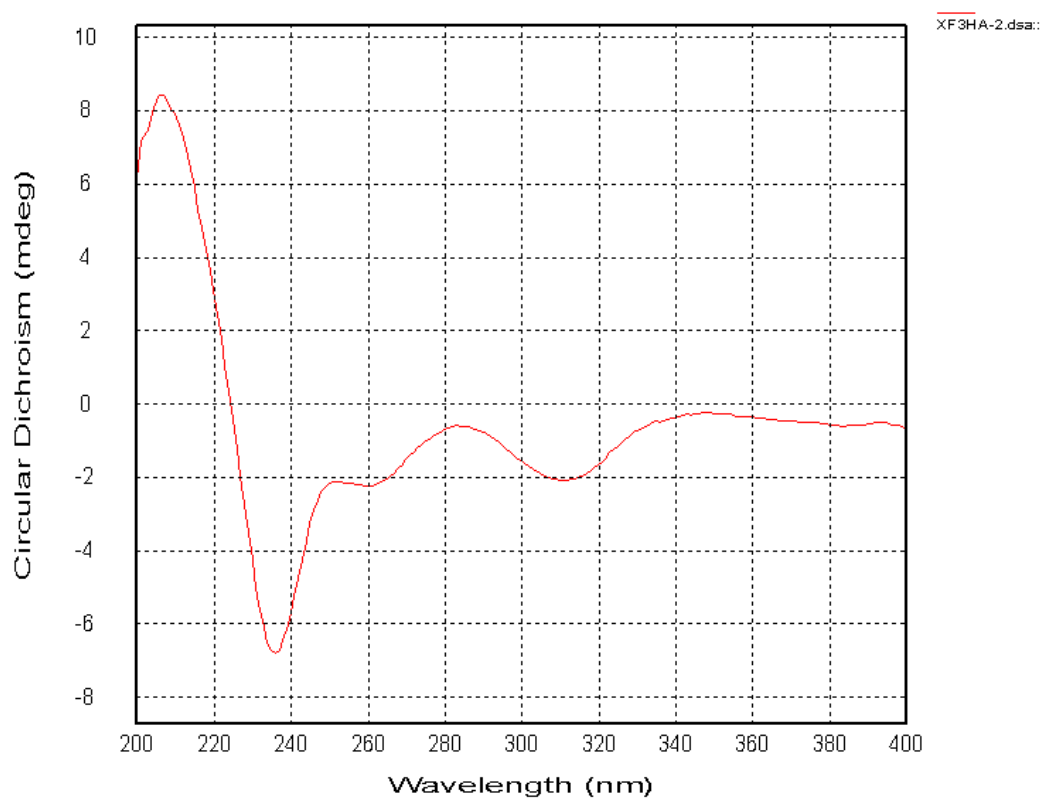

**Figure S55.** CD spectrum of **9**.

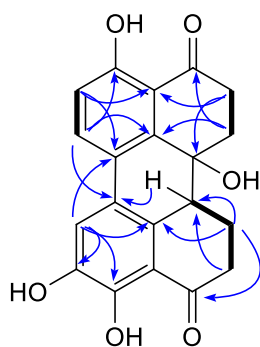

**Figure S56.** Key  $^1\text{H}$ - $^1\text{H}$  COSY (bold lines), HMBC (H→C) correlations for compound **10**.

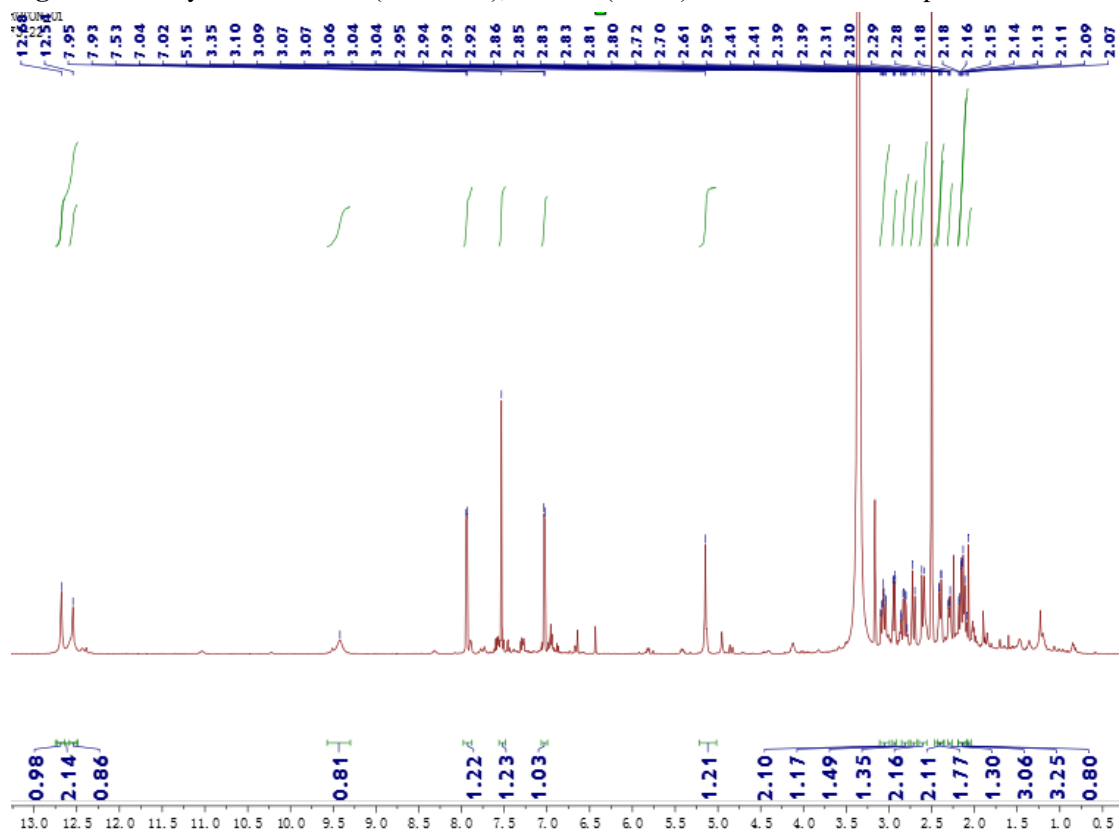

**Figure S57.**  $^1\text{H}$  NMR spectrum (600 MHz) of **10** in  $\text{DMSO-}d_6$ .



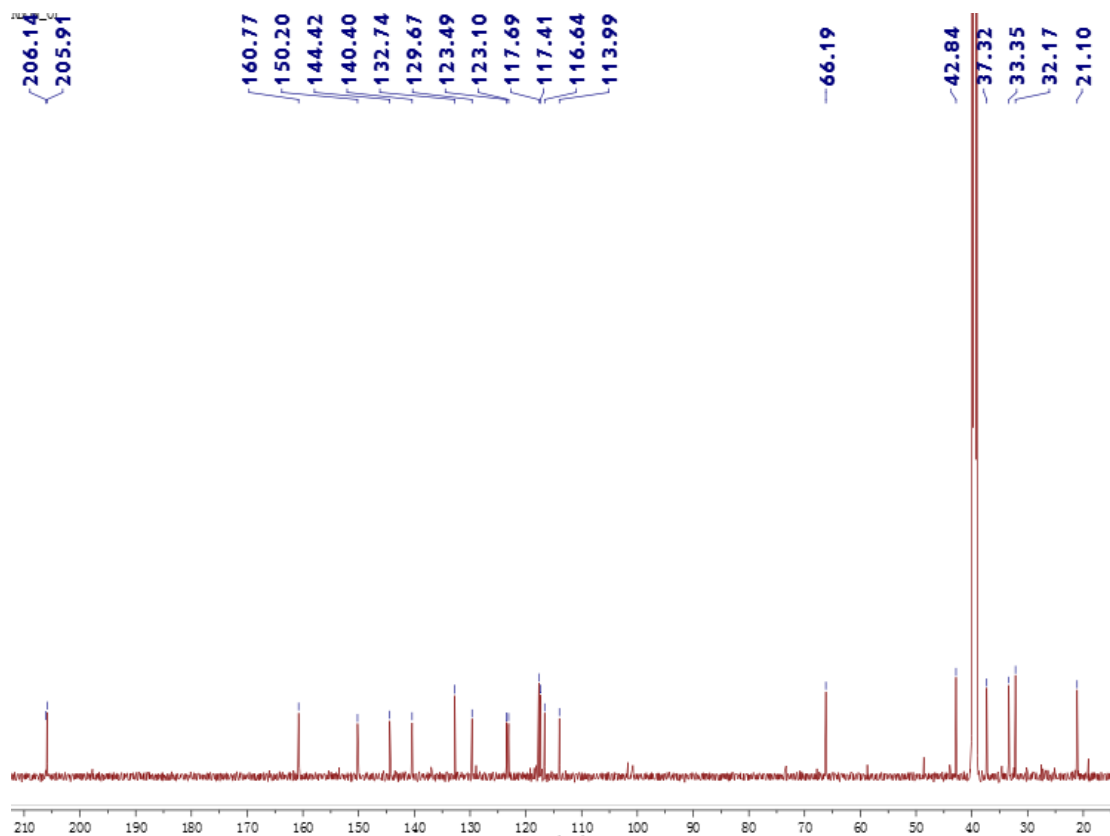

Figure S58.  $^{13}\text{C}$  NMR spectrum (150 MHz) of **10** in  $\text{DMSO-}d_6$ .

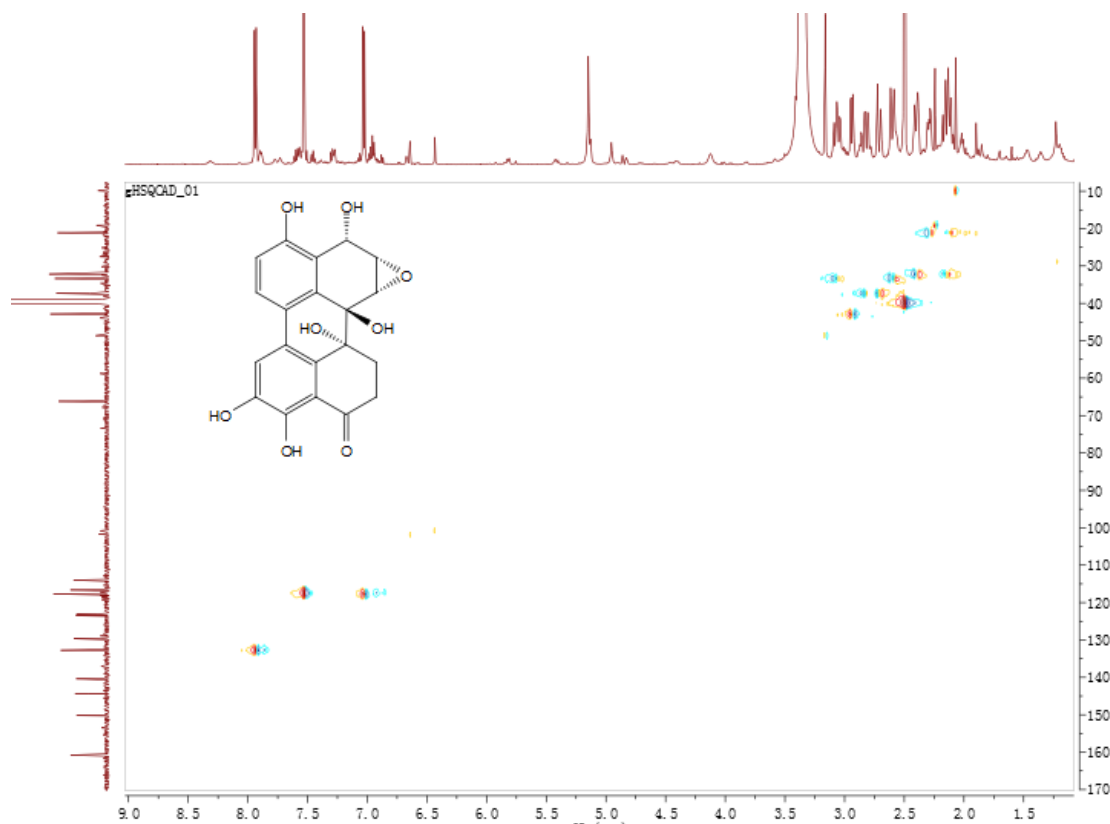

Figure S59. HSQC spectrum (600 MHz) of **10** in  $\text{DMSO-}d_6$ .

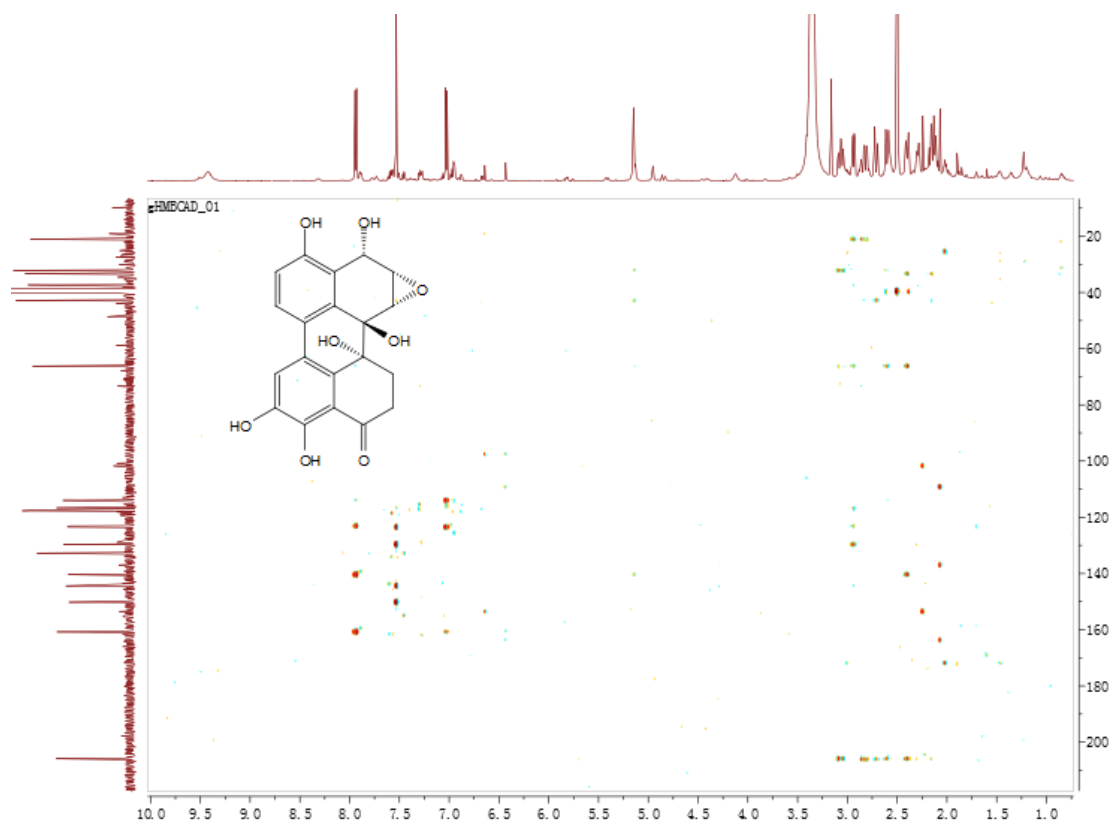

**Figure S60.** HMBC spectrum (600 MHz) of **10** in DMSO-*d*<sub>6</sub>.

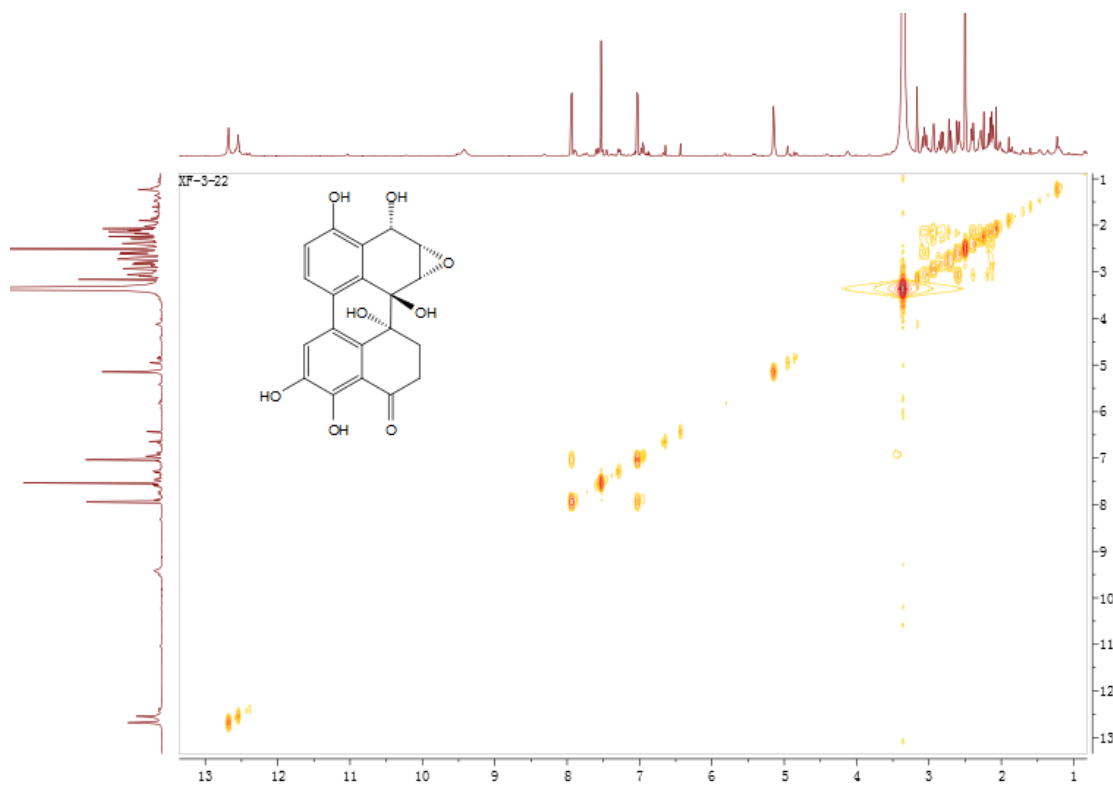

**Figure S61.** <sup>1</sup>H-<sup>1</sup>H COSY spectrum (600 MHz) of **10** in DMSO-*d*<sub>6</sub>.

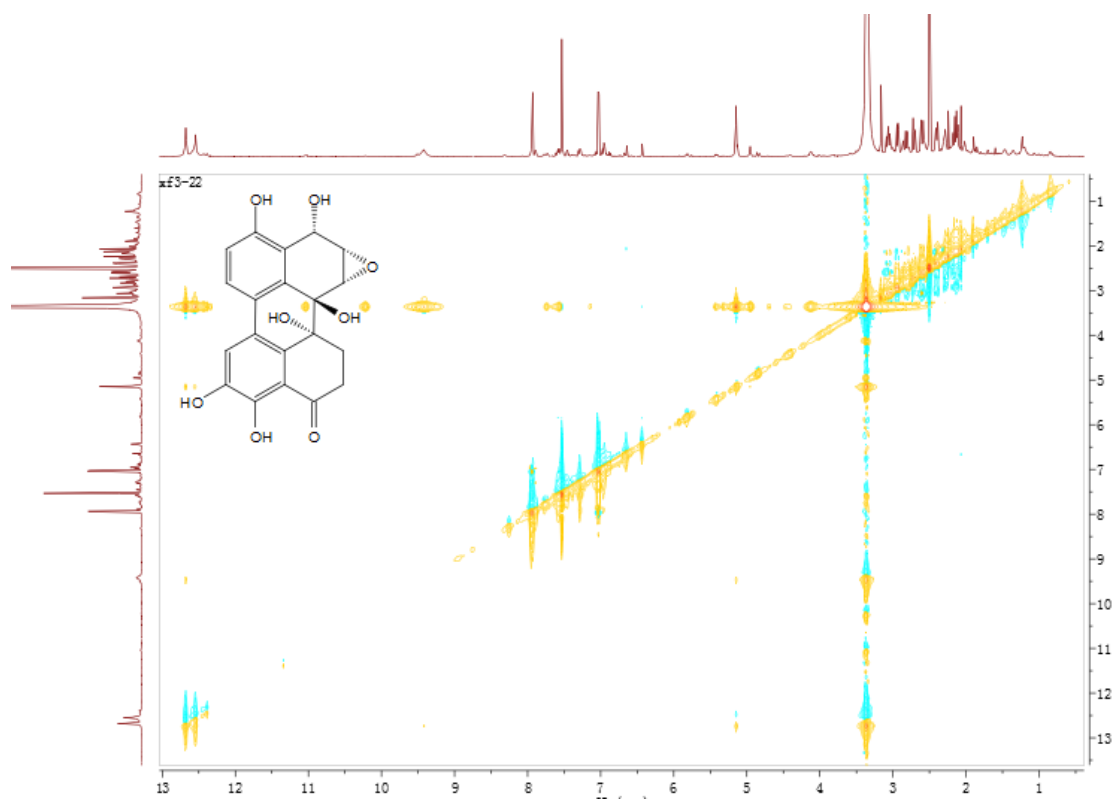

**Figure S62.** NOESY spectrum (600 MHz) of **10** in DMSO- $d_6$ .

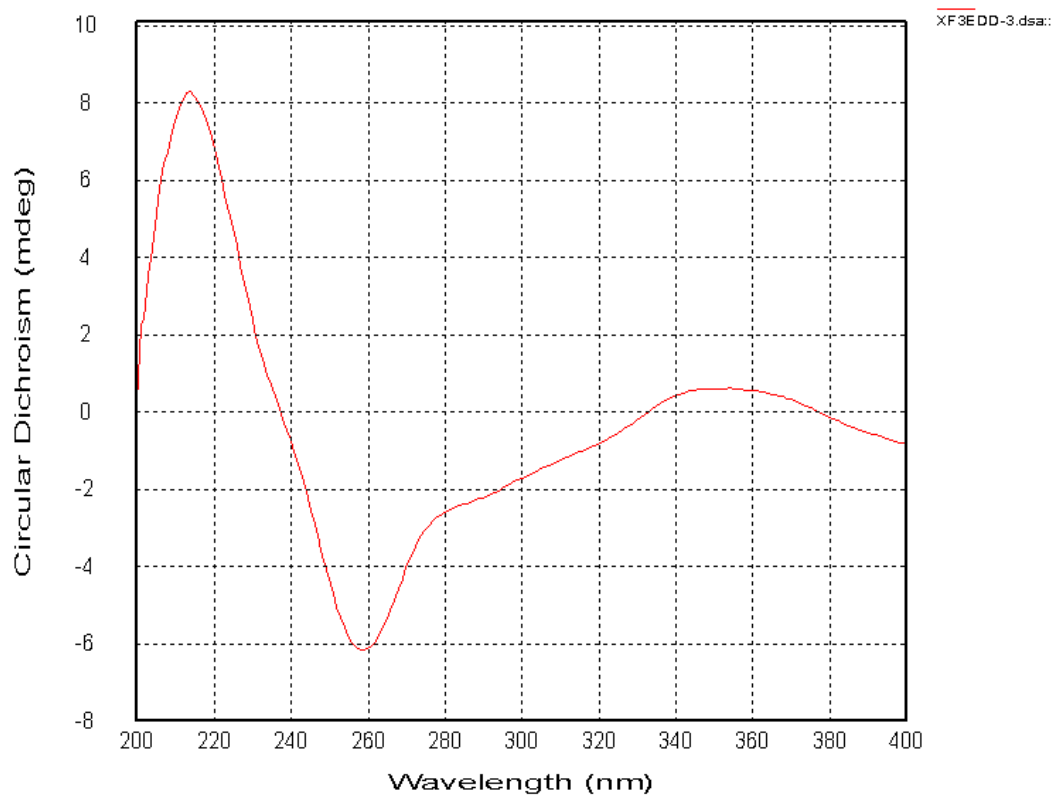

**Figure S63.** CD spectrum of **10**.

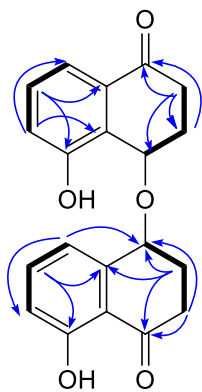

**Figure S64.** Key  $^1\text{H}$ - $^1\text{H}$  COSY (bold lines), HMBC (H→C) correlations for compound **11**.

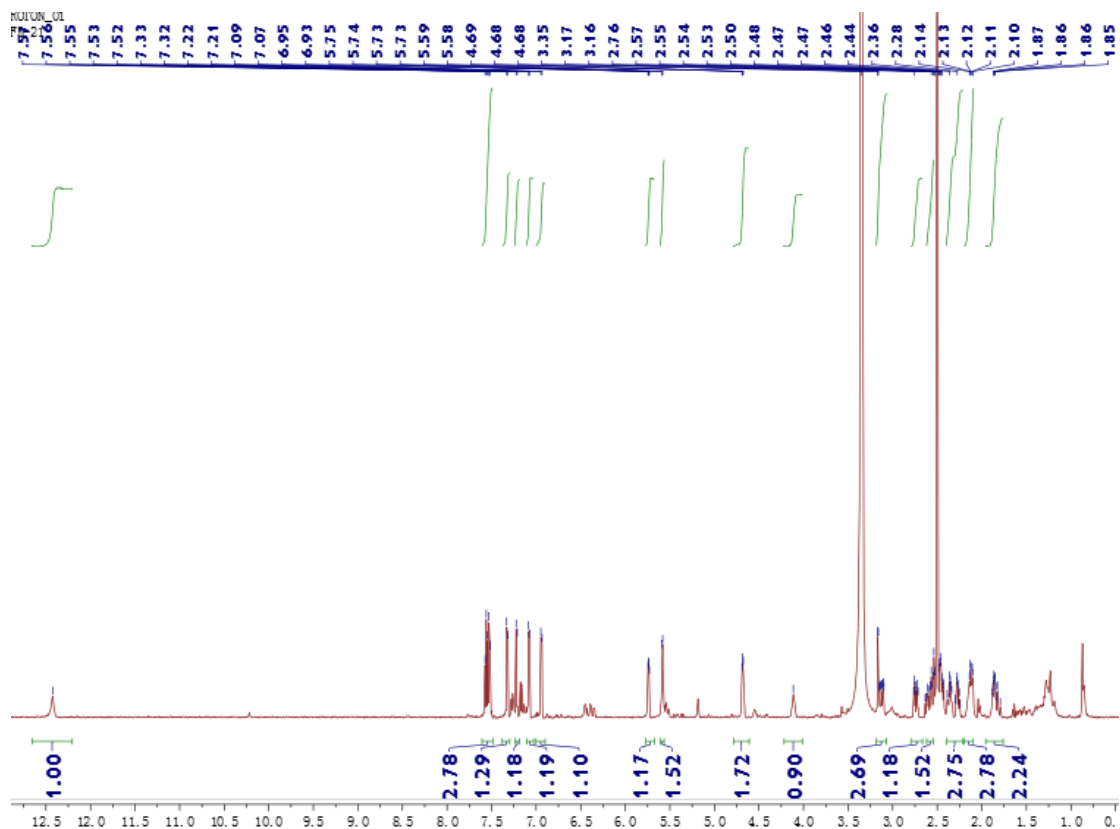

**Figure S65.**  $^1\text{H}$  NMR spectrum (600 MHz) of **11** in  $\text{DMSO-}d_6$ .

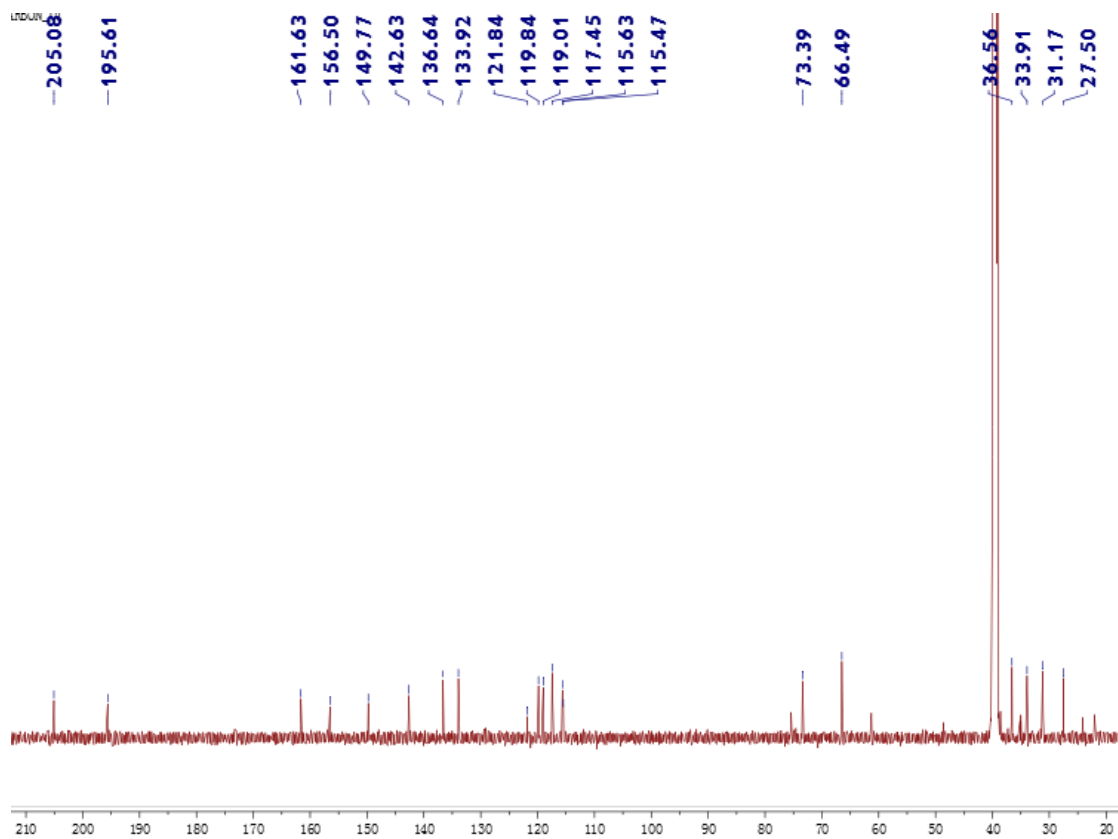

Figure S66.  $^{13}\text{C}$  NMR spectrum (150 MHz) of **11** in  $\text{DMSO-}d_6$ .

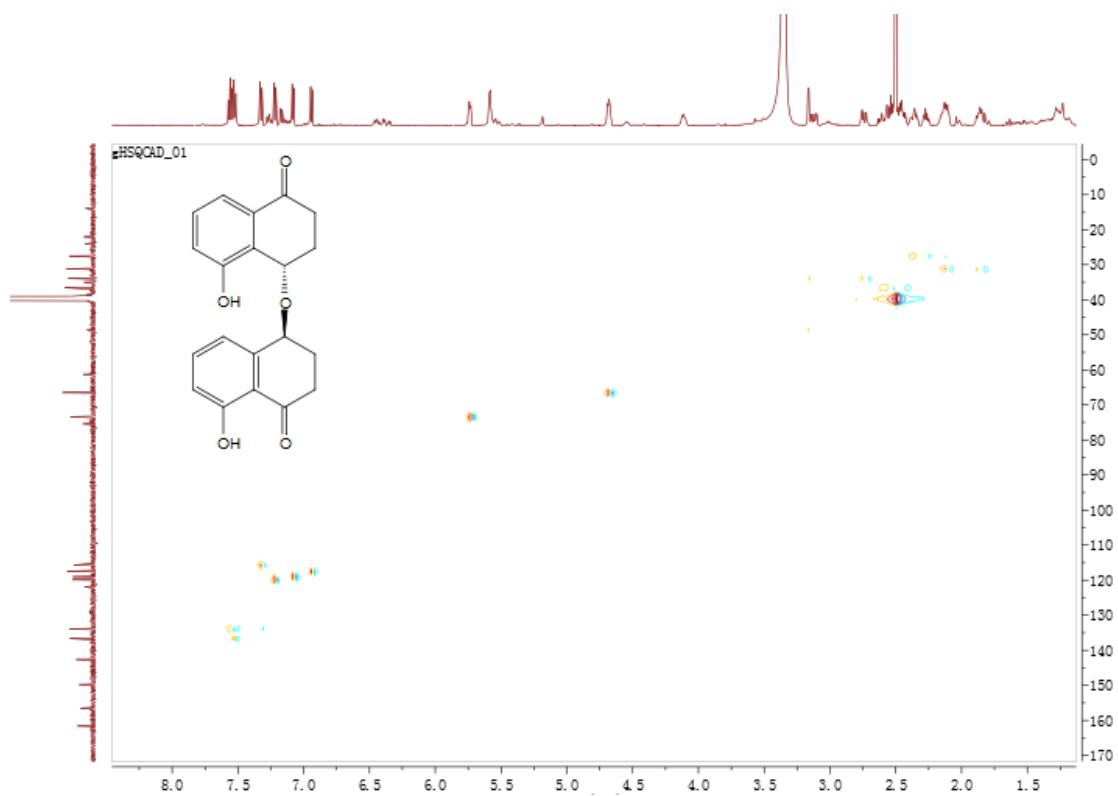

Figure S67. HSQC spectrum (600 MHz) of **11** in  $\text{DMSO-}d_6$ .

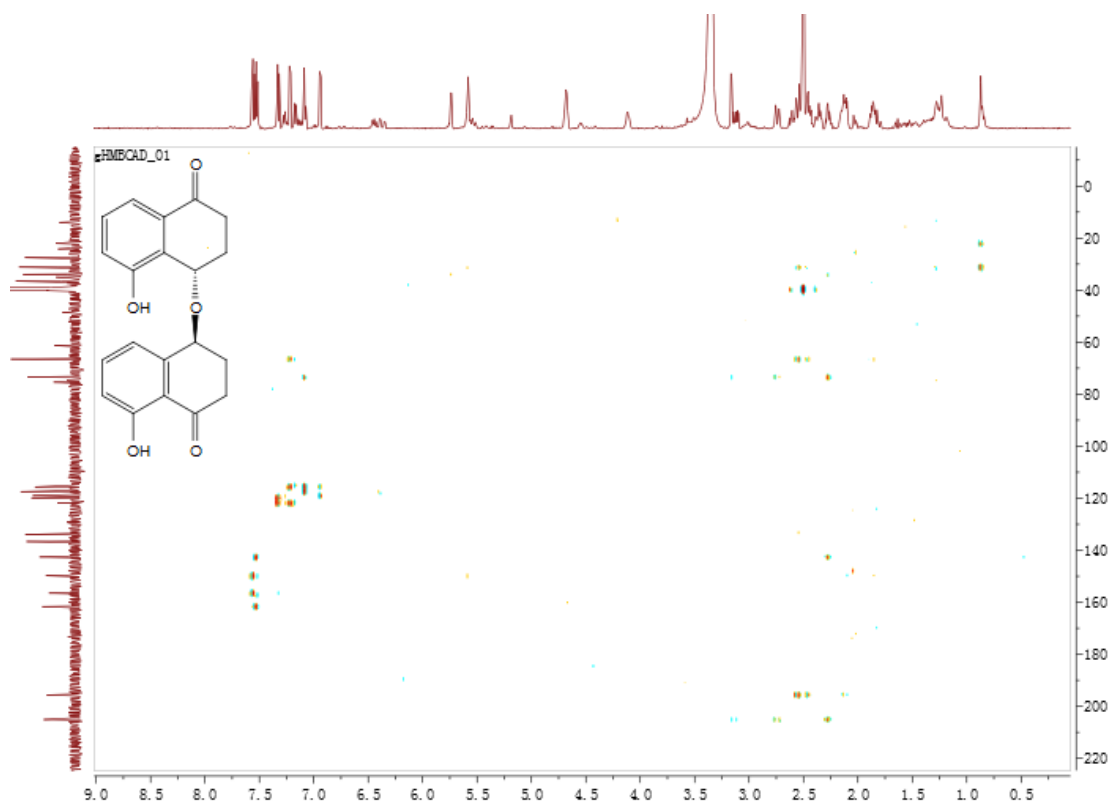

**Figure S68.** HMBC spectrum (600 MHz) of **11** in DMSO- $d_6$ .

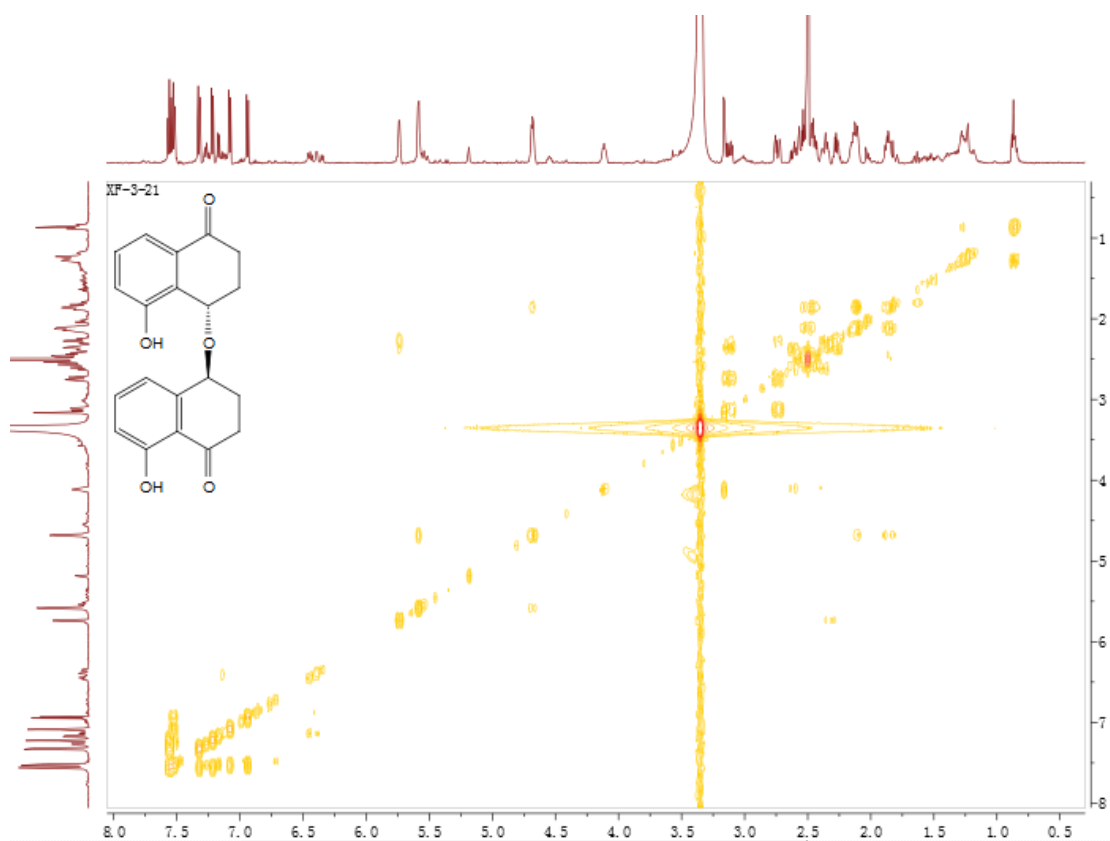

**Figure S69.**  $^1\text{H}$ - $^1\text{H}$  COSY spectrum (600 MHz) of **11** in DMSO- $d_6$ .

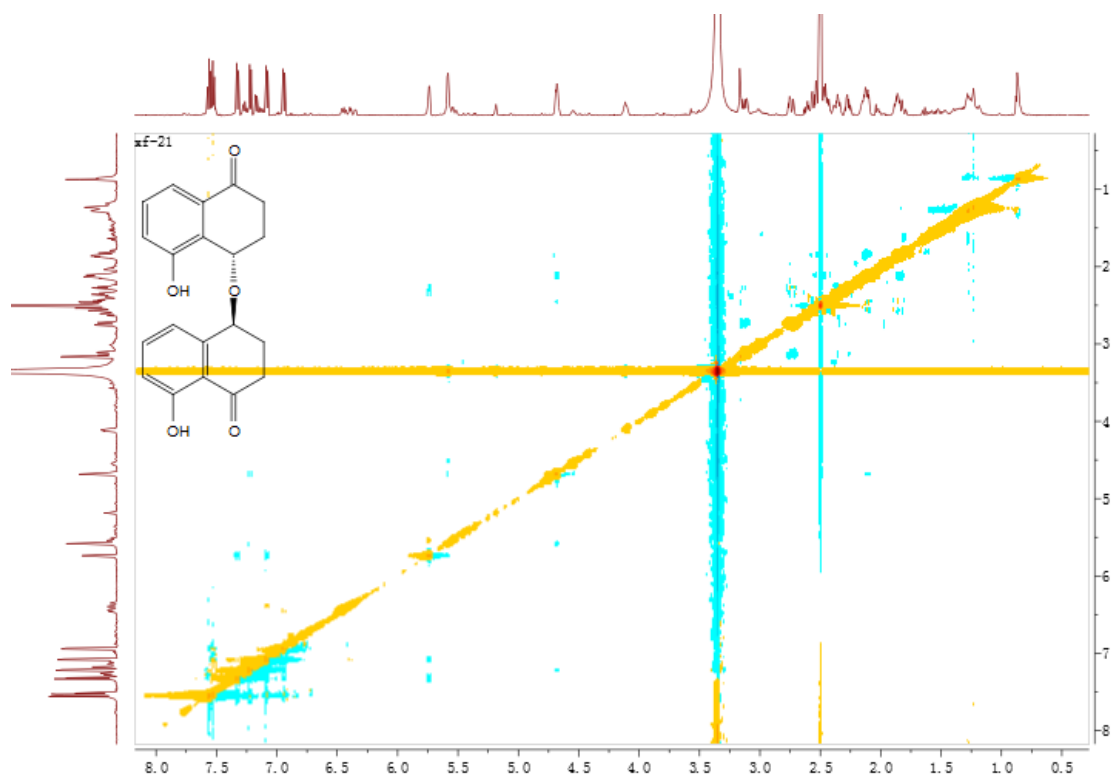

**Figure S70.** NOESY spectrum (600 MHz) of **11** in DMSO-*d*<sub>6</sub>.

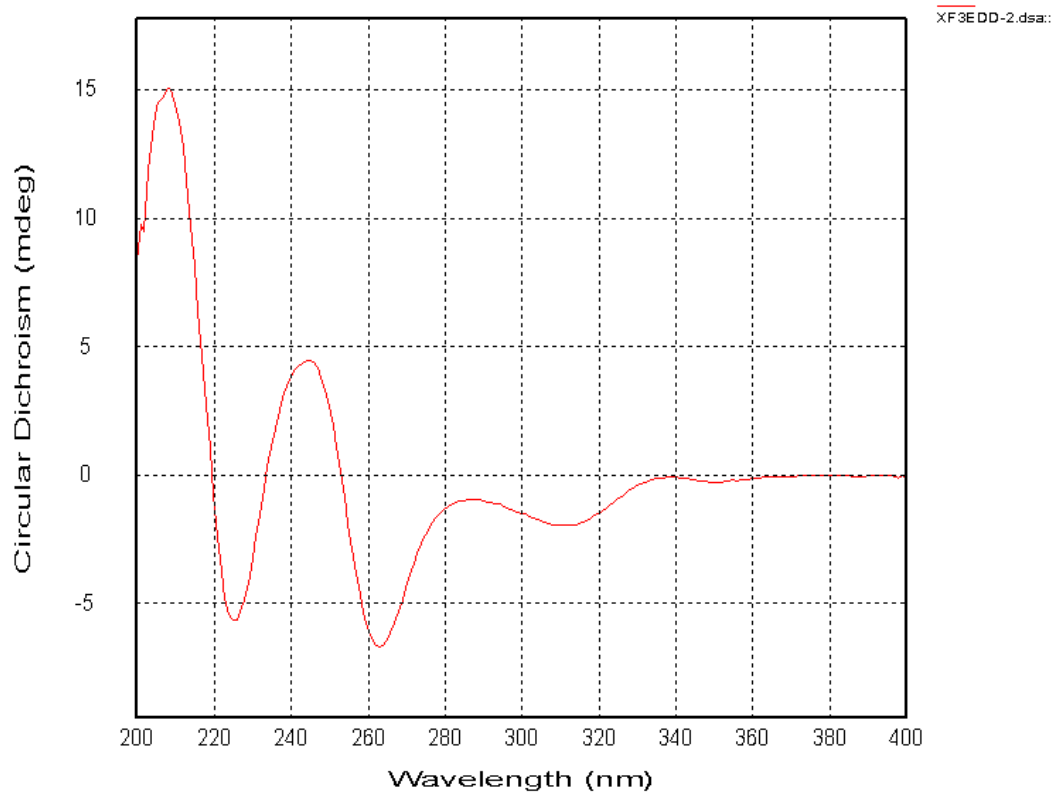

**Figure S71.** CD spectrum of **11**.

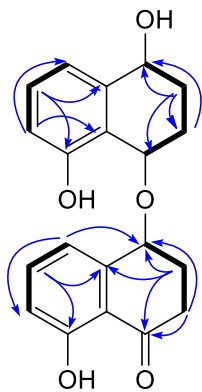

**Figure S72.** Key  $^1\text{H}$ - $^1\text{H}$  COSY (bold lines), HMBC (H $\rightarrow$ C) correlations for compound **12**.

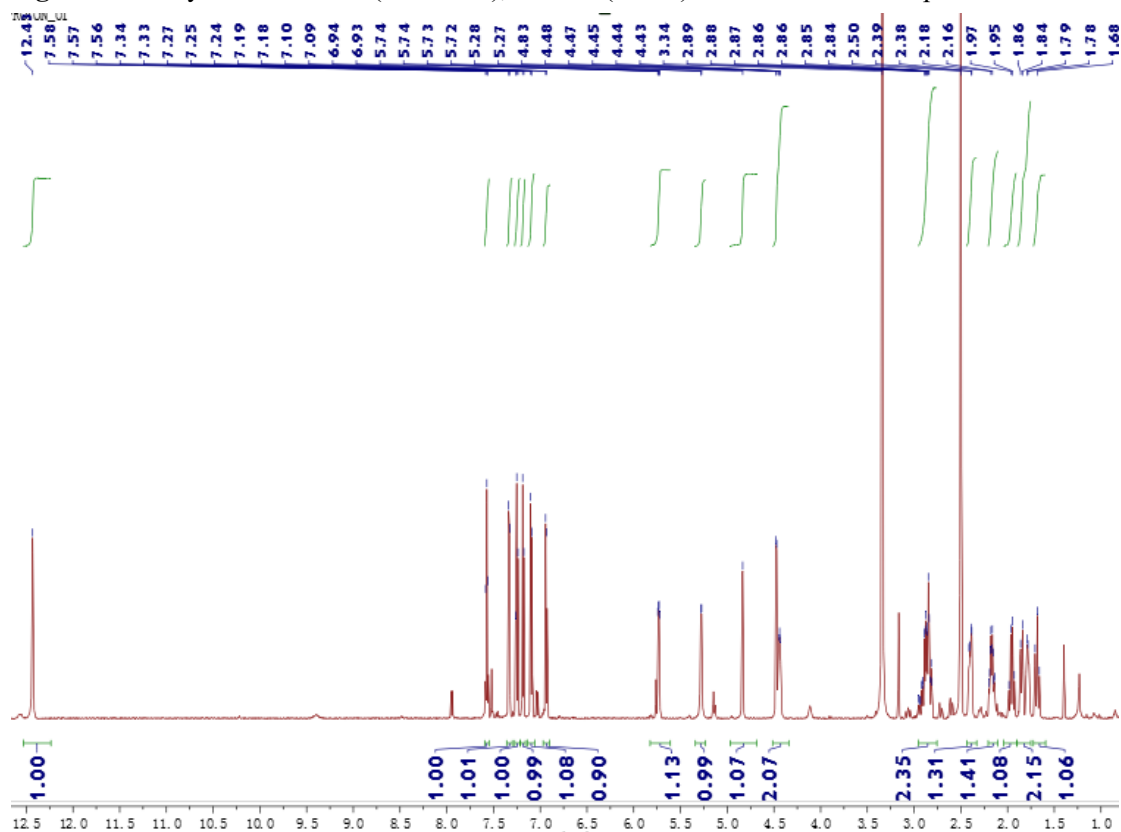

**Figure S73.**  $^1\text{H}$  NMR spectrum (600 MHz) of **12** in  $\text{DMSO-}d_6$ .



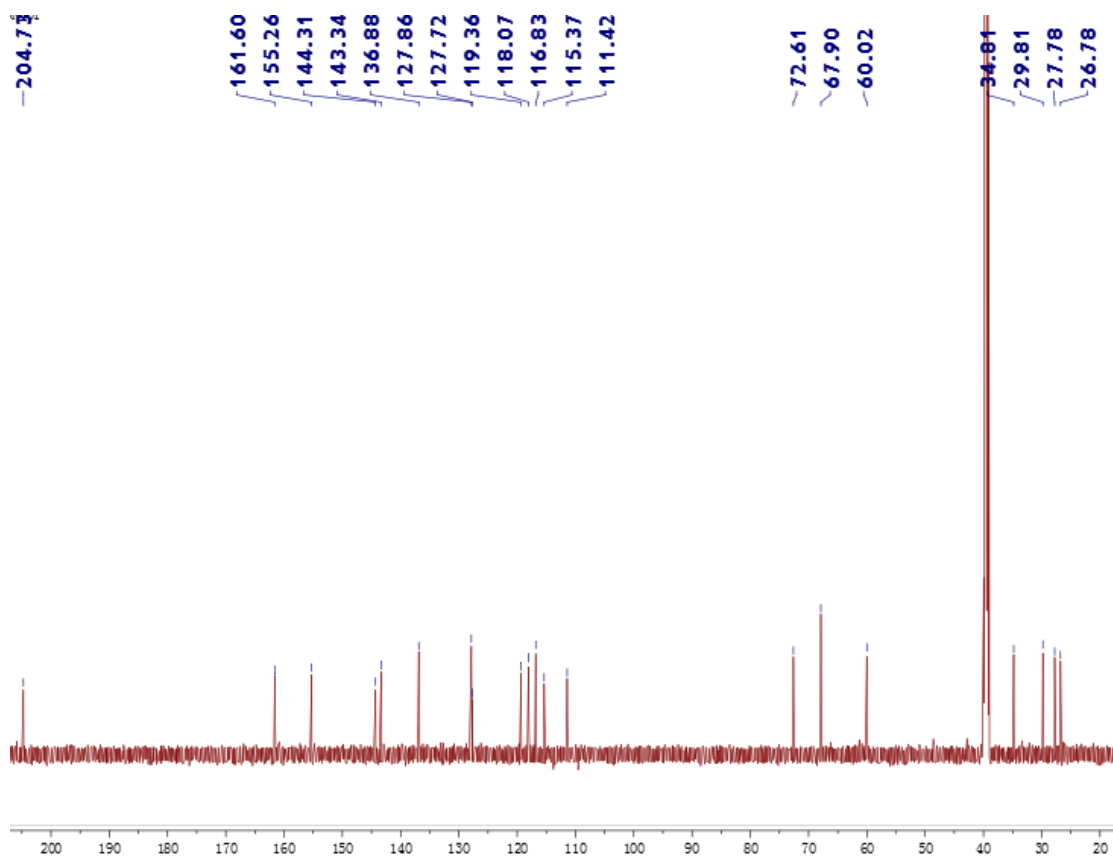

Figure S74.  $^{13}\text{C}$  NMR spectrum (150 MHz) of **12** in  $\text{DMSO-}d_6$ .

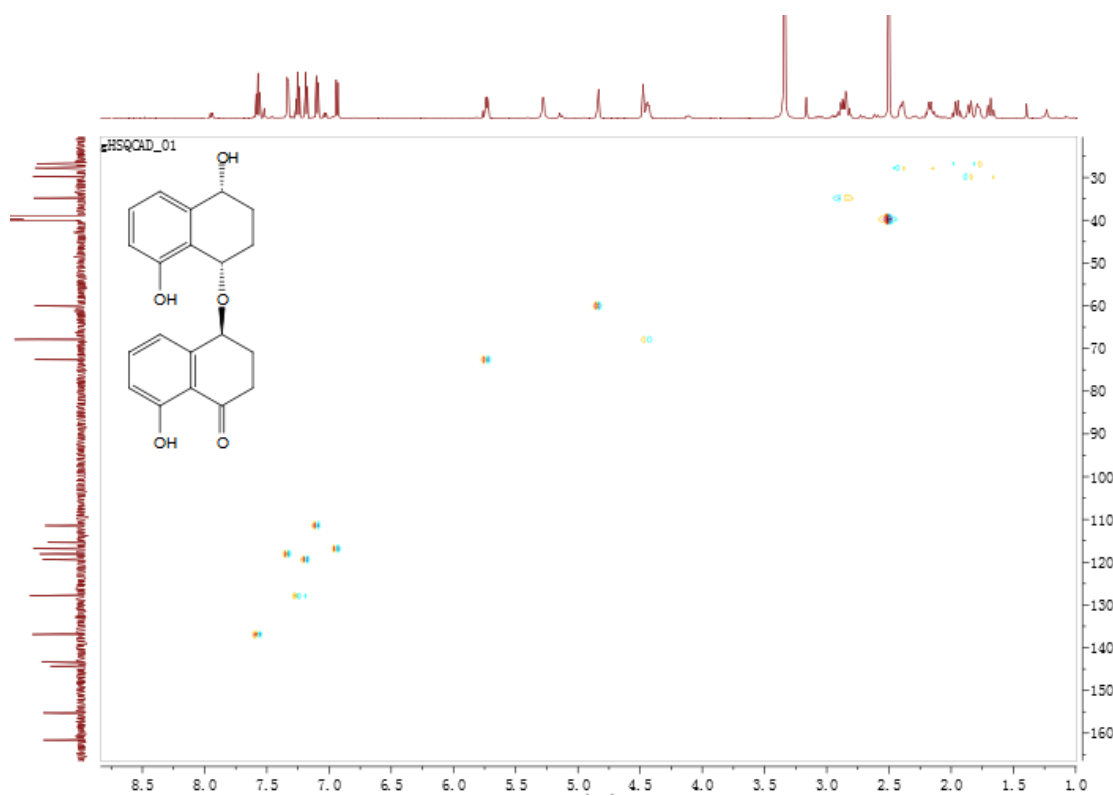

Figure S75. HSQC spectrum (600 MHz) of **12** in  $\text{DMSO-}d_6$ .

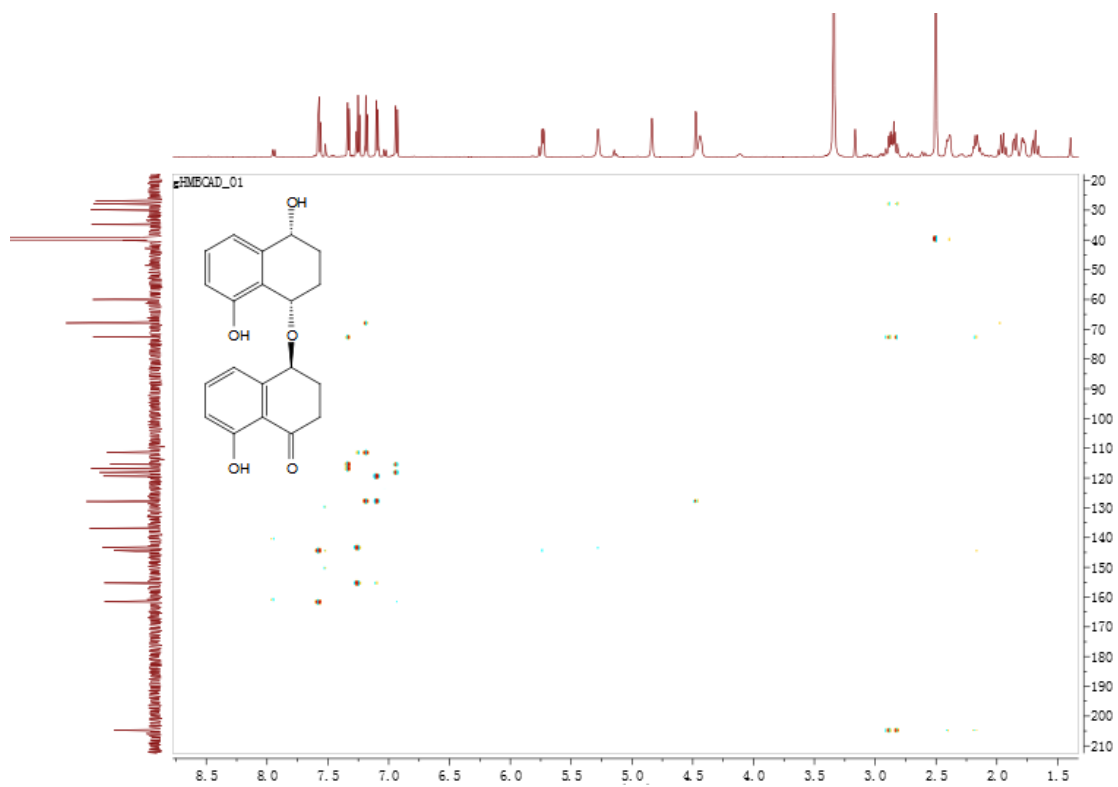

**Figure S76.** HMBC spectrum (600 MHz) of **12** in DMSO- $d_6$ .

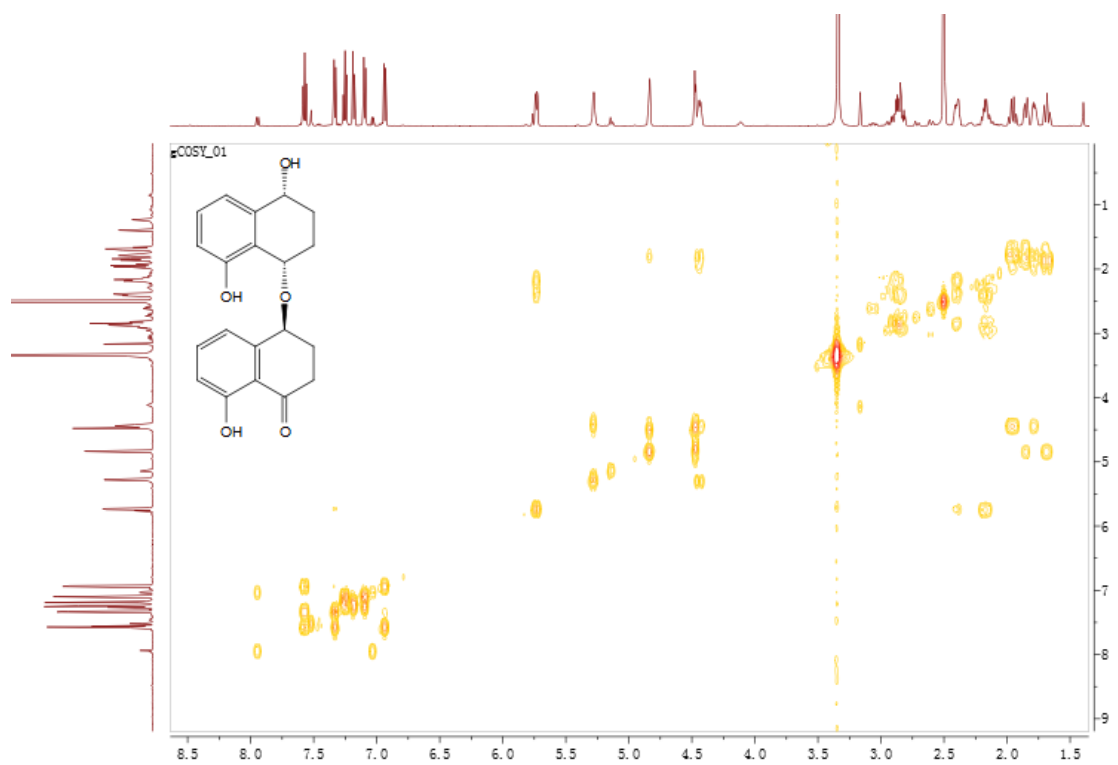

**Figure S77.**  $^1\text{H}$ - $^1\text{H}$  COSY spectrum (600 MHz) of **12** in DMSO- $d_6$ .

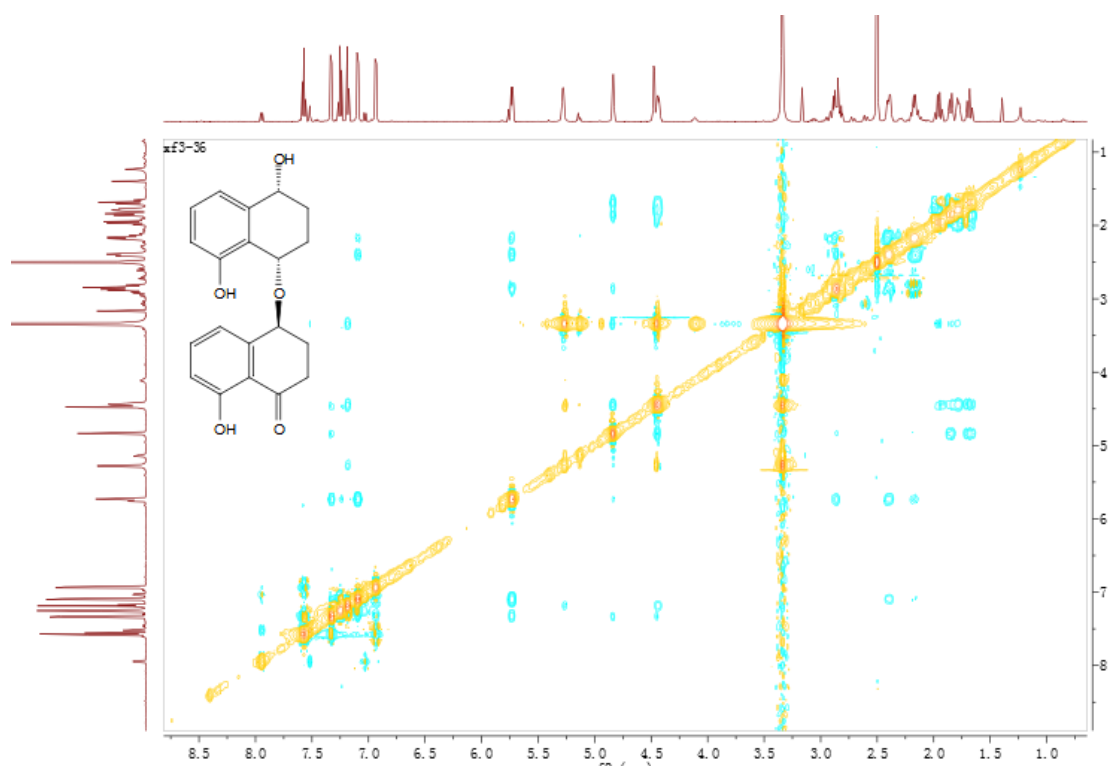

**Figure S78.** NOESY spectrum (600 MHz) of **12** in DMSO- $d_6$ .

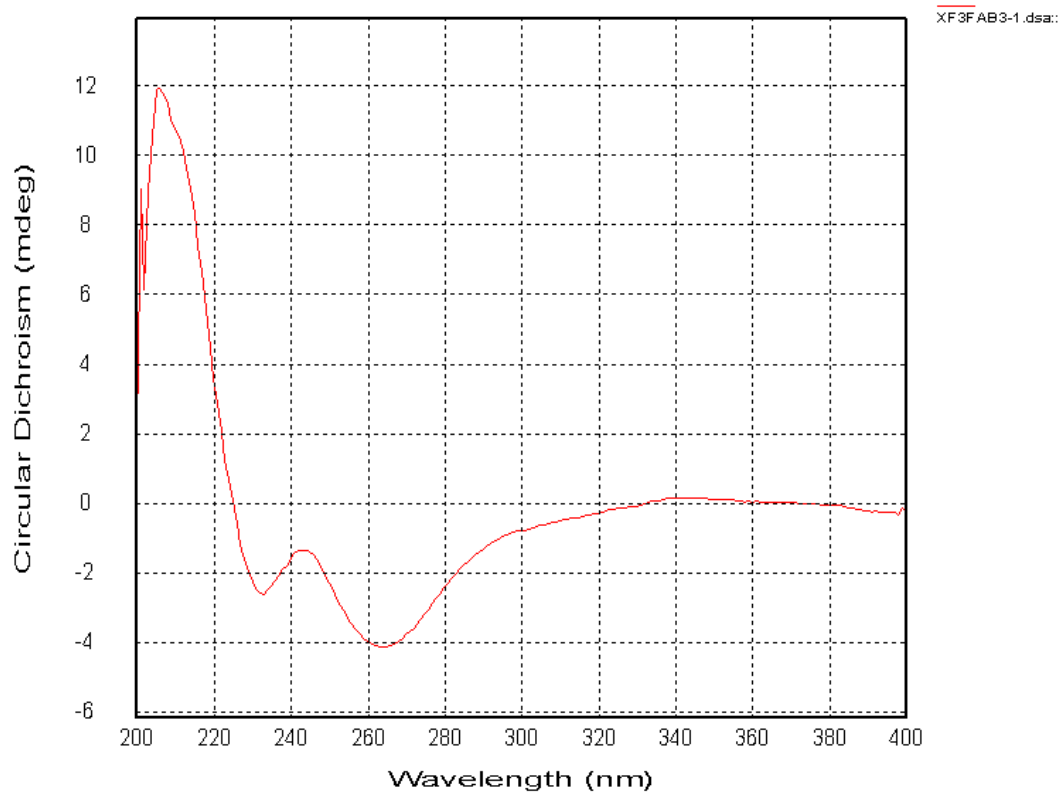

**Figure S79.** CD spectrum of **12**.

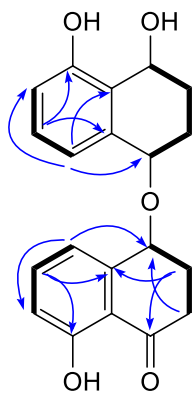

**Figure S80.** Key  $^1\text{H}$ - $^1\text{H}$  COSY (bold lines), HMBC (H $\rightarrow$ C) correlations for compound **13**.

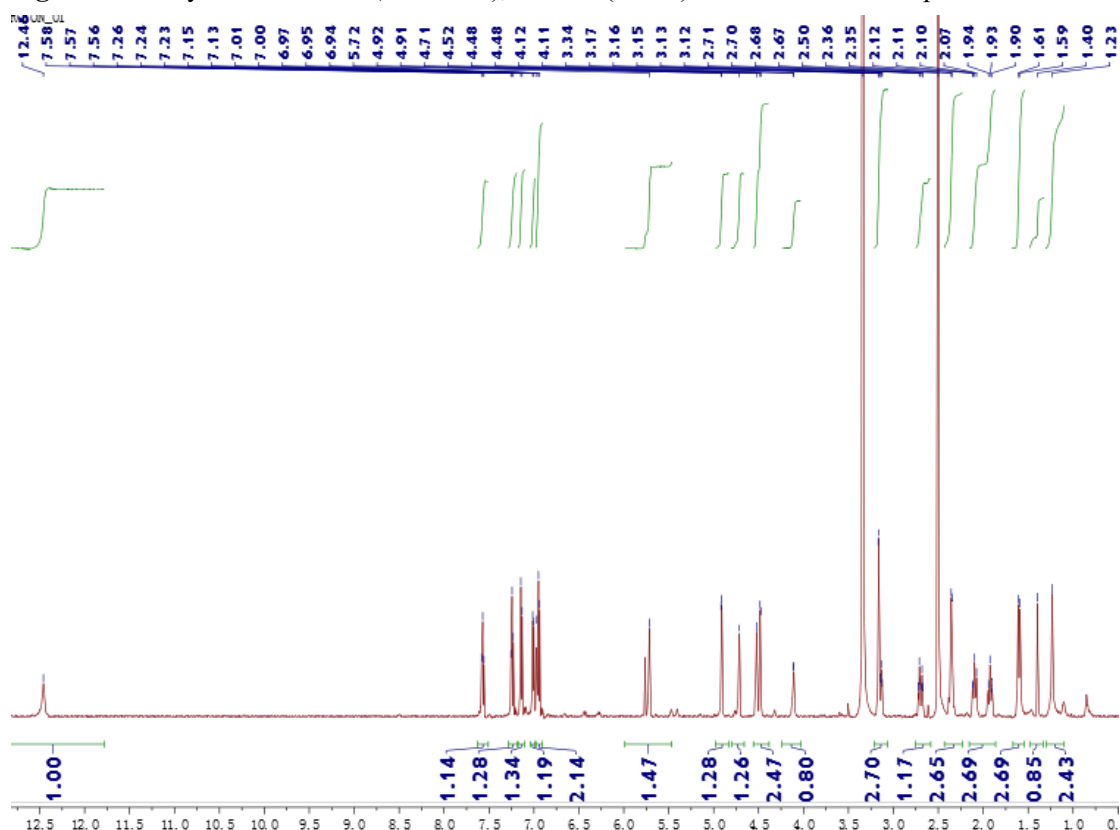

**Figure S81.**  $^1\text{H}$  NMR spectrum (600 MHz) of **13** in  $\text{DMSO-}d_6$ .

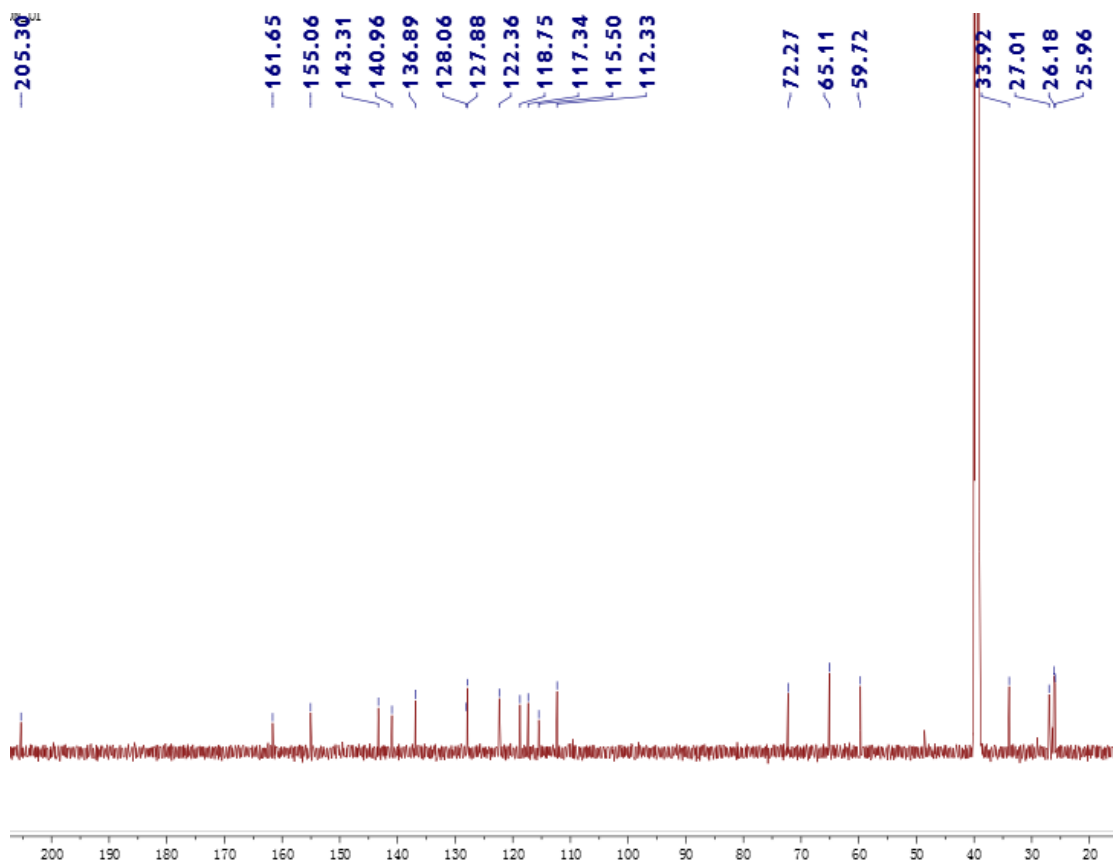

Figure S82.  $^{13}\text{C}$  NMR spectrum (150 MHz) of **13** in  $\text{DMSO-}d_6$ .

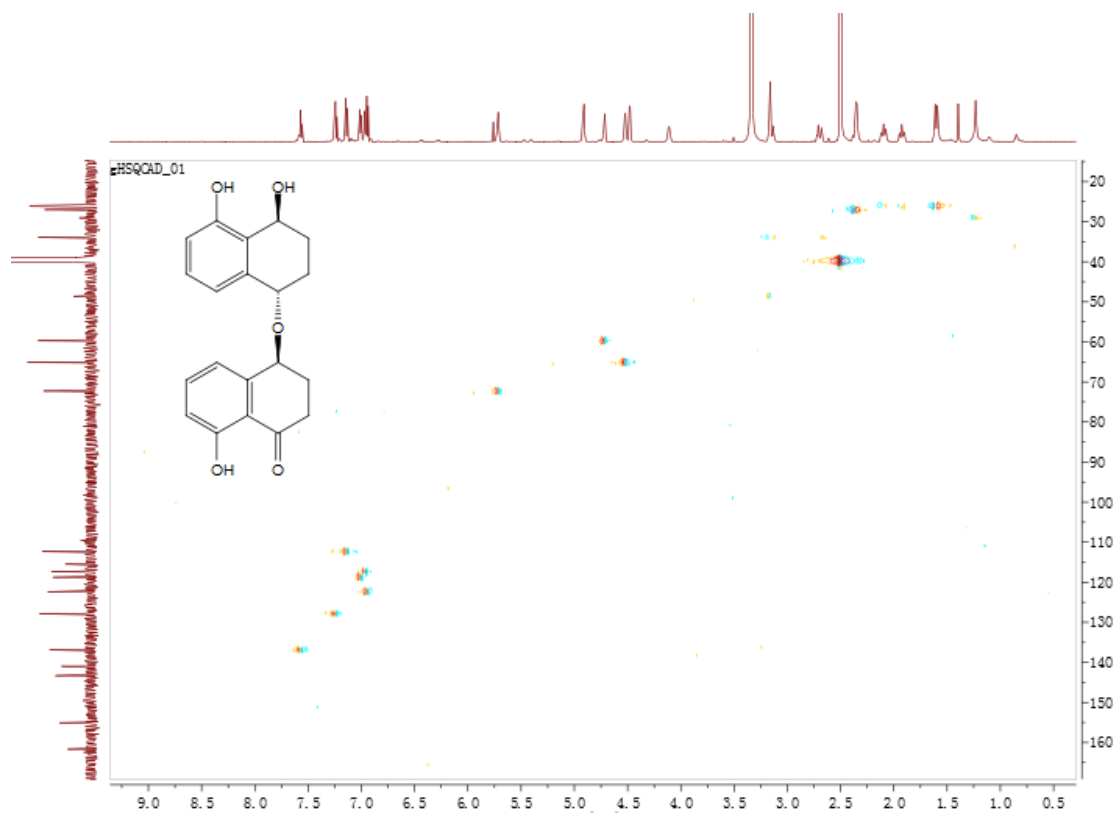

Figure S83. HSQC spectrum (600 MHz) of **13** in  $\text{DMSO-}d_6$ .

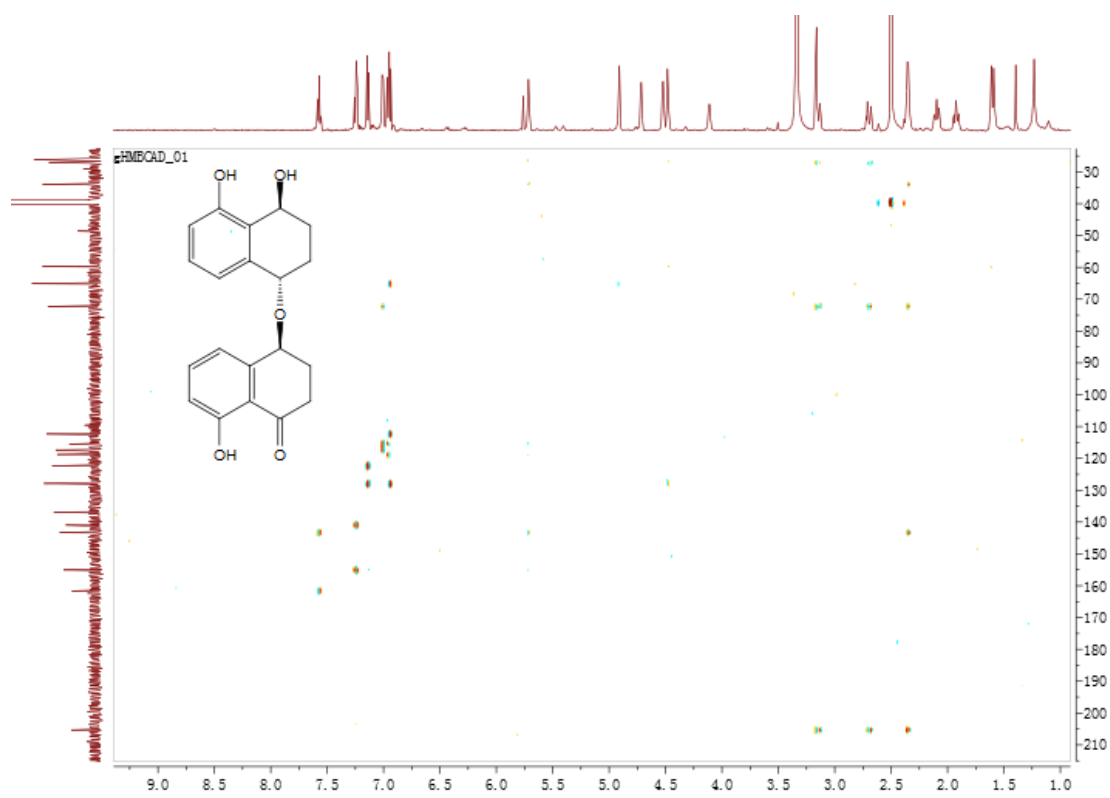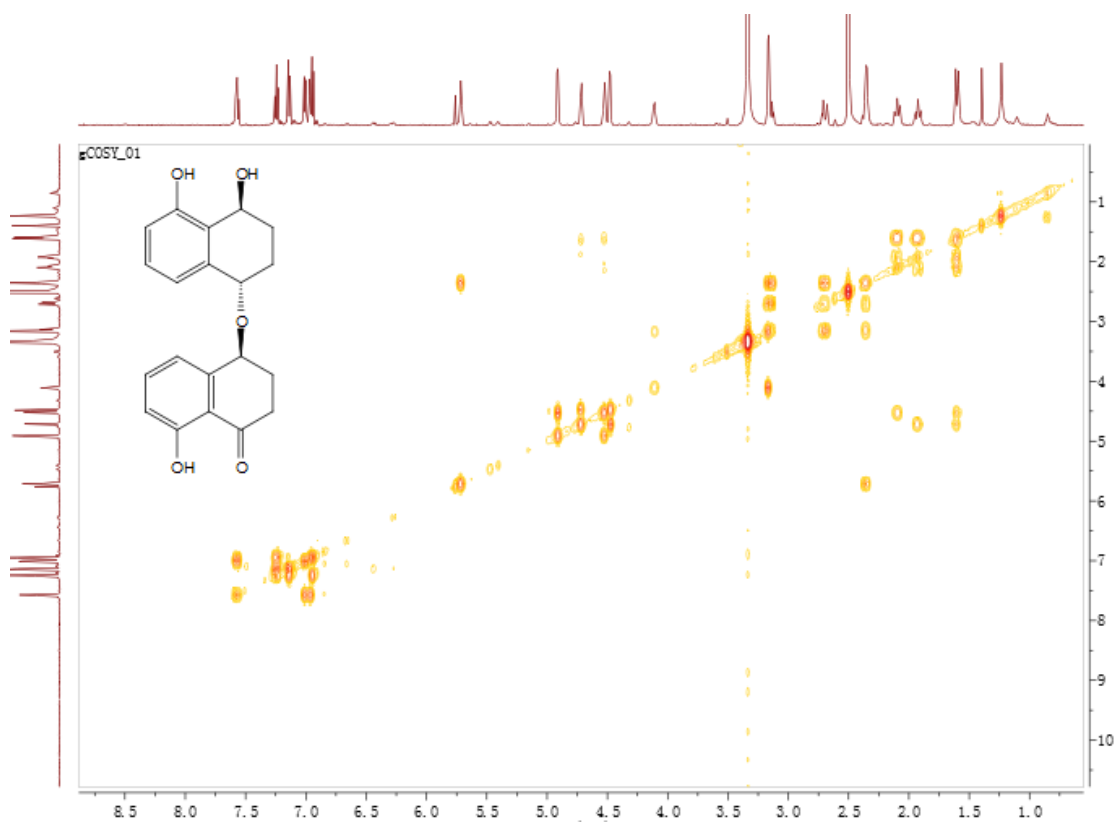

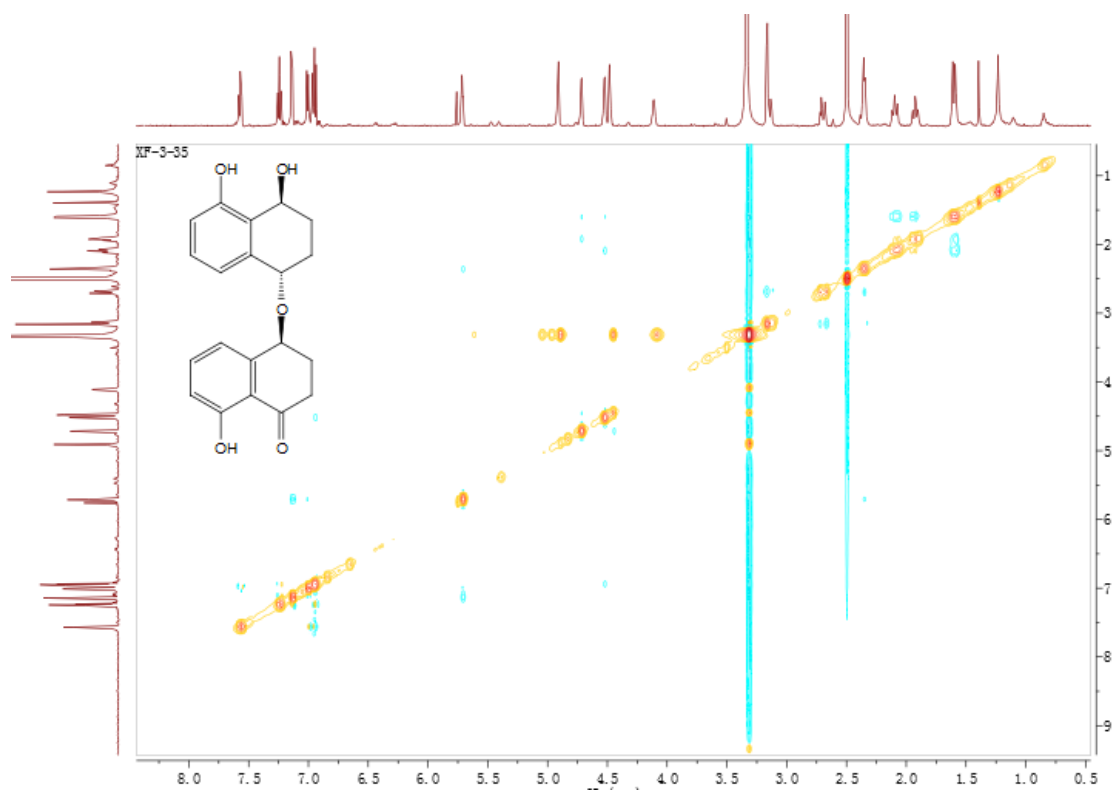

**Figure S86.** NOESY spectrum (600 MHz) of **13** in DMSO- $d_6$ .

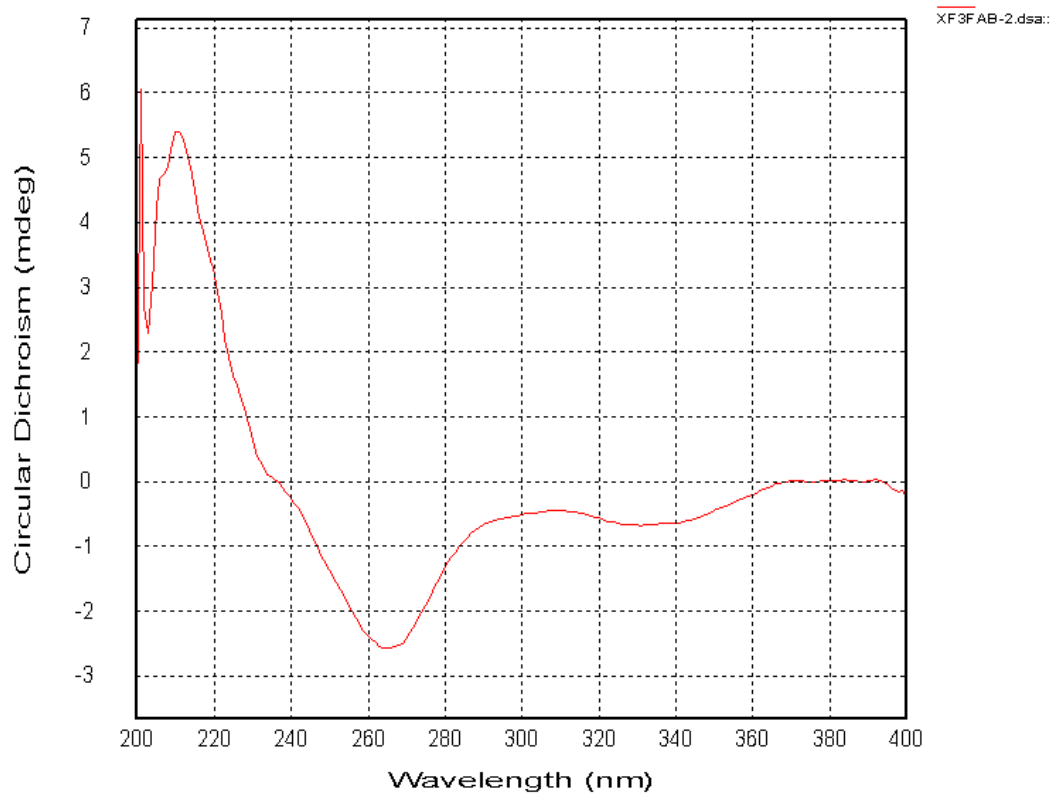

**Figure S87.** CD spectrum of **13**.

## Reference for Supporting Information

1. Shinichi S., Taisuke I. *et al.* CJ-12,371 and CJ-12,372, Two novel DNA gyrase inhibitors fermentation, isolation, structural elucidation and biological activities. *J Antibiot* **48**, 134-142 (1995).
2. Li, C. Y. *et al.* Juglanones A and B: Two Novel Tetralone Dimers from Walnut Pericarp (*Juglans regia*). *Helv Chim Acta* **96**, 1031-1035 (2013).
3. Tetsuo K., Nigel C. V., Paul D. B., Monique S. J. S. Dihydroisocoumarins and a tetralone from *Cytospora eucalypticola*. *Phytochemistry* **62**, 779-782 (2003).
4. Zhu Y. H. *et al.* Screening and isolation of antinematodal metabolites against *Bursaphelenchus xylophilus* produced by fungi. *Ann. Microbiol.* **58**, 375-380 (2008).
5. Sanglard, D. *et al.* Susceptibilities of *Candida albicans* multidrug transporter mutants to various antifungal agents and other metabolic inhibitors. *Antimicrob. Agents Chemother.* **40**, 2300-2305 (1996).
6. Sanglard, D. *et al.* Cloning of *Candida albicans* genes conferring resistance to azole antifungal agents: characterization of *CDR2*, a new multidrug ABC transporter gene. *Microbiology* **143**, 405-416 (1997).
7. Mukherjee, P. K. *et al.* Mechanism of fluconazole resistance in *Candida albicans* biofilms: phase-specific Role of efflux pumps and membrane sterols. *Infection and immunity* **71**, 4333-4340 (2003).
8. Otzen, T. *et al.* Folate-synthesizing enzyme system as target for development of inhibitors and inhibitor combinations against *Candida albicans* synthesis and biological activity of new 2,4-diaminopyrimidines and 4'-substituted 4-aminodiphenyl sulfones. *J. Med. Chem.* **47**, 240-253 (2004).
